# Supplementary material
Source: PubMed Central journal article supplement (PMC2917183)

# Asymmetric Synthesis of Bicyclic Amidines via Rhodium-Catalyzed [2 + 2 + 2] Cycloaddition of Carbodiimides.

Robert T. Yu and Tomislav Rovis\*

*Department of Chemistry, Colorado State University  
Fort Collins, Colorado 80523*

## ***Supporting Information***

|                                                                                     |      |
|-------------------------------------------------------------------------------------|------|
| <b>I.1</b> General Methods.....                                                     | S-2  |
| <b>I.2</b> General Procedure for synthesis of ligands.....                          | S-2  |
| <b>I.3</b> General Procedure for synthesis of carbodiimides.....                    | S-3  |
| <b>I.4</b> General procedure for the Rh-catalyzed [2+2+2] cycloaddition.....        | S-7  |
| <b>I.5</b> <sup>1</sup> H NMR and <sup>13</sup> C NMR spectra of new compounds..... | S-20 |
| <b>I.6</b> X-ray data of <b>3bc</b> .....                                           | S-76 |

**General Methods.** All reactions were carried out under an atmosphere of argon in flame-dried glassware with magnetic stirring. Toluene was degassed with argon and passed through one column of neutral alumina and one column of Q5 reactant. Triethylamine (peptide synthesis grade) was purchased from Fisher Scientific and used without further purification. Column chromatography was performed on Silicycle Inc. silica gel 60 (230-400 mesh). Thin layer chromatography was performed on Silicycle Inc. 0.25 mm silica gel 60-F plates. Visualization was accomplished with UV light (254 nm) and/or potassium permanganate.

Alkynes **1a – 1d**, **1f**, **1h – 1l**, **1p**, and **1q** were purchased from Aldrich Chemicals Co. and used without further purification. Alkynes **1e** and **1g** are known compounds and can be synthesized from the corresponding aryl bromide or iodide via a typical Sonogashira procedure described previously.<sup>1</sup> Alkyne **1m** was prepared by a typical methylation using (trimethylsilyl)diazomethane solution (2.0 M in Et<sub>2</sub>O) of the corresponding carboxylic acid, which was purchased from Aldrich Chemicals Co. Alkyne **1n** and **1o** were prepared by typical TBS-protection of the corresponding alcohols, which were purchased from Aldrich Chemicals Co. [Rh(C<sub>2</sub>H<sub>4</sub>)<sub>2</sub>Cl]<sub>2</sub> and **L1** were purchased from Strem Chemical, Inc. and used without further purification. Synthesis of **L2** was described previously while **L3 – L5** can be synthesized by the procedure described within. All racemate products are obtained via the same cycloaddition using the *rac*-**L3** as the ligand. Carbodiimides **2a – 2f**, **5**, and **8** can be synthesized by the procedures described within.

#### General procedure for synthesis of ligands:

To a flame-dried round bottom flask charged with a magnetic stir bar was added 4 Å molecular sieves, the diol (2.11 mmol) and 9 ml of THF. To the reaction mixture was added Et<sub>3</sub>N (3.40 eq, 7.17 mmol) and phosphorus trichloride (1.2 eq, 2.53 mmol) dropwise at 0 °C. The mixture was allowed to warm to ambient temperature and stirred for 40 minutes. A solution of amine (10 eq, 21.10 mmol) in 11 ml of THF was added slowly at 0 °C. The reaction was allowed to stir overnight at ambient temperature before it was diluted with diethyl ether and filtered. The filtrate was concentrated in vacuo and the resulting crude material was purified by flash column chromatography (4:96 EtOAc:Hexane) to afford the desired phosphoramidite as a white solid.

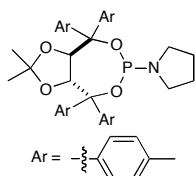

#### **1-[4,4,8,8-Tetrakis-(4-methyl-phenyl)-2,2-dimethyl-tetrahydro-[1,3]dioxolo[4,5-e][1,3,2]dioxaphosphepin-6-yl]-pyrrolidine (L3).**

Flash Chromatography (96:4 Hexanes:EtOAc) yielded a white solid (45%).  $R_f = 0.50$  (90:10 Hexanes:EtOAc);  $[\alpha]_D^{20} = -109.4$  (c=1.0, CHCl<sub>3</sub>); <sup>1</sup>H NMR (400 MHz, CDCl<sub>3</sub>) δ 7.64 (2H, d,  $J = 8.1$  Hz), 7.46 (2H, d,  $J = 8.3$  Hz), 7.34 (2H, d,  $J = 8.1$  Hz), 7.29 (2H, d,  $J = 8.1$  Hz), 7.11-7.01 (6H, m) 7.04 (2H, d, 8.1 Hz), 5.15 (1H, dd,  $J = 8.5, 3.4$  Hz), 4.76 (1H, d,  $J = 8.5$  Hz), 3.41-3.37 (2H, m), 3.25-3.21 (2H, m), 2.31 (3H, s), 2.31 (3H, s), 2.30 (3H, s), 2.28 (3H, s) 1.83-1.78 (4H, m), 1.31 (3H, s), 0.29 (3H, s); <sup>13</sup>C NMR (100 MHz, CDCl<sub>3</sub>) δ 144.6, 144.2,

<sup>1</sup> Yu, R. T.; Rovis, T. *J. Am. Chem. Soc.* **2006**, *128*, 12370.

139.6, 139.5, 137.0, 136.8, 136.6, 129.1, 129.0, 128.8, 128.5, 128.4, 128.0, 127.2, 127.2, 126.3, 111.6, 83.1, 82.8, 82.6, 81.6, 81.1, 45.2, 45.0, 27.8, 26.2, 26.2, 25.6, 21.3, 21.3, 21.2; <sup>31</sup>P NMR (75 MHz, CDCl<sub>3</sub>) δ 138.74; IR (Thin Film) 2924, 2862, 1507, 1452, 1377, 1247, 1161, 1044, 907 cm<sup>-1</sup>.

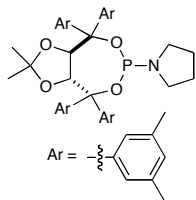

**1-[4,4,8,8-Tetrakis-(3,5-dimethyl-phenyl)-2,2-dimethyl-tetrahydro-[1,3]dioxolo[4,5-e][1,3,2]dioxaphosphepin-6-yl]-pyrrolidine (L4).**

Flash Chromatography (96:4 Hexanes:EtOAc) yielded a white solid (50%).  $R_f = 0.50$  (90:10 Hexanes:EtOAc);  $[\alpha]_D^{20} = -108.0$  (c=1.0, CHCl<sub>3</sub>); <sup>1</sup>H NMR (400 MHz, CDCl<sub>3</sub>) δ 7.37 (2H, s), 7.16 (2H, s), 7.04 (2H, s), 7.02 (2H, s), 6.84 (3H, s), 6.80 (1H, s), 5.08 (1H, dd,  $J = 8.5$ , 2.5 Hz), 4.74 (1H, d,  $J = 8.0$  Hz), 3.47-3.35 (2H, m), 3.35-3.15 (2H, m), 2.27 (6H, s), 2.25 (12H, s), 2.24 (6H, s), 1.86-1.72 (4H, m), 1.32 (3H, s), 0.25 (3H, s); <sup>13</sup>C NMR (100 MHz, CDCl<sub>3</sub>) δ 147.2, 146.9, 142.2, 142.1, 137.3, 136.9, 136.7, 136.3, 129.2, 128.9, 128.7, 127.9, 127.0, 126.8, 125.3, 125.2, 111.7, 83.1 (d,  $J = 4.5$  Hz), 82.9, 82.7, 81.8, 81.1 (d,  $J = 5.5$  Hz), 45.1 (d,  $J = 19.0$  Hz), 27.9, 26.3, 26.2, 25.7, 21.9, 21.8; <sup>31</sup>P NMR (75 MHz, CDCl<sub>3</sub>) δ 138.40; IR (Thin Film) 2917, 2866, 1601, 1456, 1379, 1214, 1159, 1042, 854 cm<sup>-1</sup>; HRMS (ESI)  $m/e$  calcd (M+H<sup>+</sup>) 678.3707, found 678.3702.

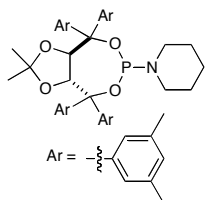

**(R,R)-1-[4,4,8,8-Tetrakis-(3,5-dimethyl-phenyl)-2,2-dimethyl-tetrahydro-[1,3]dioxolo[4,5-e][1,3,2]dioxaphosphepin-6-yl]-piperidine (L5)**

Flash Chromatography (96:4 Hexanes:EtOAc) yielded a white solid (52%);  $R_f = 0.50$  (90:10 Hexanes:EtOAc);  $[\alpha]_D^{20} = -108.0$  (c=1.0, CHCl<sub>3</sub>); <sup>1</sup>H NMR (400 MHz, CDCl<sub>3</sub>) δ 7.39 (2H, s), 7.20 (2H, s), 7.04 (4H, s), 6.84 (3H, s), 6.79 (1H, s), 5.02 (1H, dd,  $J = 8.5$ , 3.0 Hz), 4.67 (1H, d,  $J = 8.5$  Hz), 3.34-3.27 (2H, m), 3.20-3.08 (2H, m), 2.26 (6H, s), 2.26 (6H, s), 2.25 (6H, s), 2.24 (6H, s), 1.65-1.50 (6H, m), 1.37 (3H, s), 0.25 (3H, s); <sup>13</sup>C NMR (100 MHz, CDCl<sub>3</sub>) δ 147.5, 147.0, 142.1, 137.3, 136.9, 136.7, 136.4, 129.2, 128.9, 128.8, 128.7, 127.1, 126.8, 125.3, 111.5, 83.3, 82.9, 82.7, 81.4, 81.3, 81.2, 77.4, 45.3, 45.1, 27.9, 27.2, 27.2, 25.7, 25.5, 21.9, 21.8, 21.7; <sup>31</sup>P NMR (75 MHz, CDCl<sub>3</sub>) δ 138.76; IR (Thin Film) 2931, 2851, 1600, 1448, 1370, 1215, 1159, 1040, 940 cm<sup>-1</sup>; HRMS (ESI)  $m/e$  calcd (M+H<sup>+</sup>) 692.3863, found 692.3843.

**General procedure for synthesis of carbodiimides:**

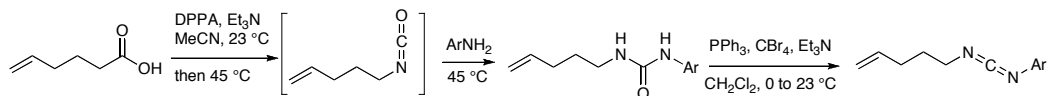

Procedure A: To a solution of 5-hexenoic acid (5.26 mmol) in 6 ml of MeCN (ca. 1 M) was added 0.77 ml of Et<sub>3</sub>N (1.06 eq, 5.57 mmol) slowly, followed by 1.2 ml of diphenyl phosphoryl azide (1.06 eq, 5.57 mmol) dropwise at ambient temperature. The reaction mixture was stirred at ambient temperature for 30 minutes before heated to 45 °C in an oil bath. The reaction mixture was stirred at 45 °C for additional two hours to ensure complete conversion to the isocyanate. The amine (1.2 eq, 6.31 mmol) was added, and the resulting reaction mixture was stirred at 45 °C for 12 hours fitted with a reflux condenser. The reaction was diluted with Et<sub>2</sub>O (40 ml), washed with 1M HCl (2x20 ml)

and brine (20 ml). The organic layer was dried over  $\text{MgSO}_4$ , filtered and concentrated *in vacuo*. The urea was then purified by silica gel flash chromatography (70:30 Hexane:EtOAc). To a solution of the urea (1.76 mmol) in 14 ml of  $\text{CH}_2\text{Cl}_2$  was added triphenyl phosphine (2.0 eq, 3.53 mmol), 1.0 ml of  $\text{Et}_3\text{N}$  (4.0 eq, 7.05 mmol), followed by a solution of  $\text{CBr}_4$  (2.0 eq, 3.53 mmol) in 5 ml of  $\text{CH}_2\text{Cl}_2$  slowly at 0 °C. The reaction mixture was stirred at ambient temperature for 12 hours and then concentrated *in vacuo*. The target carbodiimide was purified by silica gel flash chromatography (96:4 Hexane:EtOAc). Note: Two consecutive purifications of flash chromatography are recommended, as the purity of carbodiimides is vital to the success of cycloaddition.

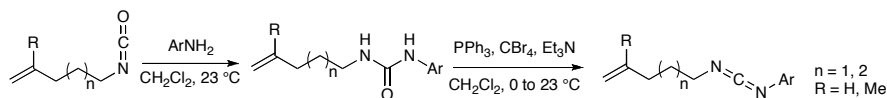

Procedure B: To a solution of isocyanate<sup>2</sup> (2.70 mmol) in 12 ml of  $\text{CH}_2\text{Cl}_2$  was added the amine (1.05 eq, 2.83 mmol). The reaction mixture was stirred at ambient temperature for 12 hours and then concentrated *in vacuo*. The crude material was dissolved in  $\text{Et}_2\text{O}$  followed by addition of Hexane. The urea was then precipitated and filtered as a white solid. To a solution of the urea (1.76 mmol) in 14 ml of  $\text{CH}_2\text{Cl}_2$  was added triphenyl phosphine (2.0 eq, 3.53 mmol), 1.0 ml of  $\text{Et}_3\text{N}$  (4.0 eq, 7.05 mmol), followed by a solution of  $\text{CBr}_4$  (2.0 eq, 3.53 mmol) in 5 ml of  $\text{CH}_2\text{Cl}_2$  slowly at 0 °C. The reaction mixture was stirred at ambient temperature for 12 hours and then concentrated *in vacuo*. The target carbodiimide was purified by silica gel flash chromatography (96:4 Hexane:EtOAc). Note: Two consecutive purifications of flash chromatography are recommended, as the purity of carbodiimides is vital to the success of cycloaddition.

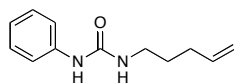

**1-(pent-4-enyl)-3-phenylurea.** Procedure B yielded a white solid (81%);  $R_f = 0.56$  (1:1 Hex/EtOAc);  $^1\text{H NMR}$  (400 MHz,  $\text{CDCl}_3$ )  $\delta$  7.37 (br s, 1H), 7.26 – 7.22 (m, 4H), 7.01 (m, 1H), 5.73 (ddt, 1H,  $J = 6.6, 10.2, 16.6$  Hz), 5.58 (m, 1H), 4.99 – 4.92 (m, 2H), 3.18 (dt, 2H,  $J = 6.4, 6.4$  Hz), 2.03 (dt, 2H,  $J = 7.2, 7.2$  Hz), 1.54 (tt, 2H,  $J = 7.2, 7.2$  Hz);  $^{13}\text{C NMR}$  (100 MHz,  $\text{CDCl}_3$ )  $\delta$  156.7, 139.1, 138.0, 129.3, 123.5, 120.8, 115.3, 39.9, 31.2, 29.5; IR (Thin Film) 3338, 2925, 1647, 1596, 1558, 1500, 1443, 1310, 1240  $\text{cm}^{-1}$ ; HRMS (ESI)  $m/e$  calcd ( $\text{M}+\text{H}^+$ ) 205.13353, found 205.13350.

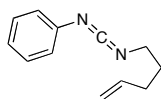

***N*-((pent-4-enylimino)methylene)aniline (2a).** Procedure B yielded a clear oil (66%);  $R_f = 0.63$  (95:5 Hex/EtOAc);  $^1\text{H NMR}$  (400 MHz,  $\text{CDCl}_3$ )  $\delta$  7.30 (t, 2H,  $J = 7.5$  Hz), 7.13 – 7.09 (m, 3H), 5.80 (ddt, 1H,  $J = 6.8, 10.2, 17.0$  Hz), 5.07 (dm, 1H,  $J = 17.1$  Hz), 5.02 (dm, 1H,  $J = 10.0$  Hz), 3.44 (t, 2H,  $J = 6.8$  Hz), 2.20 (dt, 2H,  $J = 7.0, 7.0$  Hz), 1.78 (tt, 2H,  $J = 7.0, 7.0$  Hz);  $^{13}\text{C NMR}$  (100 MHz,  $\text{CDCl}_3$ )  $\delta$  140.8, 137.4, 136.3, 129.6, 124.8, 123.7, 115.9, 46.3, 31.0, 30.6; IR (Thin Film) 2931, 2135, 1595, 1502, 1344, 1153  $\text{cm}^{-1}$ .

<sup>2</sup> (a) Yu, R. T.; Rovis, T. *J. Am. Chem. Soc.* **2006**, 128, 2782. (b) Lee, E. E.; Rovis, T. *Org. Lett. In press.*

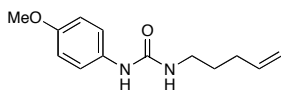

**1-(4-methoxyphenyl)-3-(pent-4-enyl)urea.** Procedure A yielded a white solid (52%);  $R_f = 0.33$  (1:1 Hex/EtOAc);  $^1\text{H NMR}$  (400 MHz,  $\text{CDCl}_3$ )  $\delta$  7.13 (d, 2H,  $J = 7.7$  Hz), 6.92 (m, 1H), 6.79 (d, 2H,  $J = 7.8$  Hz), 5.73 (m, 1H), 5.16 (m, 1H), 4.97 – 4.89 (m, 2H), 3.74 (s, 3H), 3.16 (m, 2H), 2.01 (dt, 2H,  $J = 6.2, 6.2$  Hz), 1.52 (tt, 2H,  $J = 6.6, 6.6$  Hz);  $^{13}\text{C NMR}$  (100 MHz,  $\text{CDCl}_3$ )  $\delta$  157.2, 156.8, 138.1, 131.4, 124.5, 115.2, 114.6, 55.7, 40.0, 31.3, 29.5; IR (Thin Film) 3313, 2938, 1634, 1570, 1513, 1297, 1246, 1176, 1030  $\text{cm}^{-1}$ ; HRMS (ESI)  $m/e$  calcd ( $\text{M}+\text{H}^+$ ) 235.14410, found 235.14350.

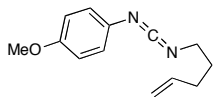

**4-methoxy-*N*-((pent-4-enylimino)methylene)aniline (2b).** Procedure A yielded a clear oil (46%);  $R_f = 0.26$  (95:5 Hex/EtOAc);  $^1\text{H NMR}$  (400 MHz,  $\text{CDCl}_3$ )  $\delta$  7.02 (d, 2H,  $J = 8.7$  Hz), 6.82 (d, 2H,  $J = 8.7$  Hz), 5.80 (ddt, 1H,  $J = 6.6, 10.0, 16.8$  Hz), 5.05 (dm, 1H,  $J = 17.3$  Hz), 5.01 (dm, 1H,  $J = 10.0$  Hz), 3.78 (s, 3H), 3.40 (t, 2H,  $J = 6.8$  Hz), 2.19 (dt, 2H,  $J = 7.0, 7.0$  Hz), 1.76 (tt, 2H,  $J = 7.0, 7.0$  Hz);  $^{13}\text{C NMR}$  (100 MHz,  $\text{CDCl}_3$ )  $\delta$  157.0, 137.5, 137.3, 133.2, 124.5, 115.8, 114.8, 55.7, 46.4, 31.0, 30.6; IR (Thin Film) 2936, 2129, 1582, 1507, 1289, 1240, 1170, 1033  $\text{cm}^{-1}$ .

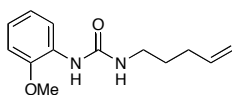

**1-(2-methoxyphenyl)-3-(pent-4-enyl)urea.** Procedure A yielded a white solid (59%);  $R_f = 0.53$  (1:1 Hex/EtOAc);  $^1\text{H NMR}$  (400 MHz,  $\text{CDCl}_3$ )  $\delta$  8.01 (dd, 1H,  $J = 1.9, 7.7$  Hz), 7.03 (s, 1H), 6.98 – 6.90 (m, 2H), 6.84 (dd, 2H,  $J = 1.7, 7.7$  Hz), 5.78 (ddt, 1H,  $J = 6.6, 10.2, 17.1$  Hz), 5.21 (m, 1H), 5.01 (dm, 1H,  $J = 17.0$  Hz), 4.96 (dm, 1H,  $J = 10.2$  Hz), 3.81 (s, 3H), 3.26 (dt, 2H,  $J = 6.7, 6.7$  Hz), 2.09 (dt, 2H,  $J = 7.2, 7.2$  Hz), 1.62 (tt, 2H,  $J = 7.2, 7.2$  Hz);  $^{13}\text{C NMR}$  (100 MHz,  $\text{CDCl}_3$ )  $\delta$  155.9, 148.5, 138.1, 128.9, 122.7, 121.4, 119.9, 115.3, 110.4, 55.8, 40.0, 31.3, 29.5; IR (Thin Film) 3326, 2933, 1640, 1602, 1564, 1462, 1284, 1252, 1170, 1025  $\text{cm}^{-1}$ ; HRMS (ESI)  $m/e$  calcd ( $\text{M}+\text{H}^+$ ) 235.14410, found 235.14318.

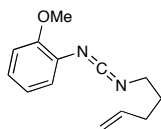

**2-methoxy-*N*-((pent-4-enylimino)methylene)aniline (2c).** Procedure A yielded a clear oil (72%);  $R_f = 0.29$  (95:5 Hex/EtOAc);  $^1\text{H NMR}$  (400 MHz,  $\text{CDCl}_3$ )  $\delta$  7.07 (ddd, 1H,  $J = 1.5, 7.7, 7.7$  Hz), 7.02 (dd, 1H,  $J = 1.6, 8.1$  Hz), 6.89 – 6.85 (m, 2H), 5.81 (ddt, 1H,  $J = 6.6, 10.0, 16.8$  Hz), 5.07 (dm, 1H,  $J = 17.0$  Hz), 5.00 (dm, 1H,  $J = 10.2$  Hz), 3.89 (s, 3H), 3.41 (t, 2H,  $J = 6.8$  Hz), 2.20 (dt, 2H,  $J = 7.0, 7.0$  Hz), 1.77 (tt, 2H,  $J = 7.0, 7.0$  Hz);  $^{13}\text{C NMR}$  (100 MHz,  $\text{CDCl}_3$ )  $\delta$  154.1, 137.7, 137.1, 129.1, 125.5, 124.8, 121.2, 115.6, 111.3, 56.1, 46.4, 31.1, 30.4; IR (Thin Film) 2936, 2135, 1589, 1502, 1464, 1344, 1245, 1109, 1027  $\text{cm}^{-1}$ .

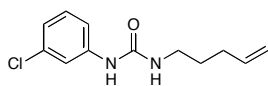

**1-(3-chlorophenyl)-3-(pent-4-enyl)urea.** Procedure A yielded a yellow oil (51%);  $R_f = 0.63$  (1:1 Hex/EtOAc);  $^1\text{H NMR}$  (400 MHz,  $\text{CDCl}_3$ )  $\delta$  7.69 (s, 1H), 7.33 (s, 1H), 7.13 – 7.11 (m, 2H), 6.96 (m, 1H), 5.77 (m, 1H), 5.73 (ddt, 1H,  $J = 6.6, 10.0, 16.8$  Hz), 5.00 – 4.85 (m, 2H), 3.18 (dt, 2H,  $J = 6.8, 6.8$  Hz), 2.03 (dt, 2H,  $J = 7.0, 7.0$  Hz), 1.53 (tt, 2H,  $J = 7.2, 7.2$  Hz);  $^{13}\text{C NMR}$  (100 MHz,  $\text{CDCl}_3$ )  $\delta$  156.5, 140.4, 137.8, 134.8, 130.2, 123.1, 120.1, 118.0, 115.4, 39.9, 31.2, 29.3; IR (Thin Film) 3326, 2931, 1653, 1595, 1558, 1475, 1271, 1233, 1093, 1074  $\text{cm}^{-1}$ ; HRMS (ESI)  $m/e$  calcd ( $\text{M}+\text{H}^+$ ) 239.09456, found 239.09391.

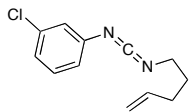

**3-chloro-*N*-((pent-4-enylimino)methylene)aniline (2d).** Procedure A yielded a clear oil (55%);  $R_f = 0.57$  (10:1 Hex/EtOAc);  $^1\text{H NMR}$  (400 MHz,  $\text{CDCl}_3$ )  $\delta$  7.20 (m, 1H), 7.08 – 7.06 (m, 2H), 6.96 (dm, 1H,  $J = 8.1$  Hz), 5.80 (ddt, 1H,  $J = 6.8, 10.2, 17.1$  Hz), 5.09 – 5.01 (m, 2H), 3.46 (t, 2H,  $J = 6.8$  Hz), 2.20 (dt, 2H,  $J = 7.0, 7.0$  Hz), 1.78 (tt, 2H,  $J = 6.8, 6.8$  Hz);  $^{13}\text{C NMR}$  (100 MHz,  $\text{CDCl}_3$ )  $\delta$  142.4, 137.2, 134.9, 134.8, 130.4, 124.9, 123.9, 121.9, 116.0, 46.2, 31.0, 30.5; IR (Thin Film) 2936, 2140, 1589, 1485, 1344, 1164, 1109  $\text{cm}^{-1}$ .

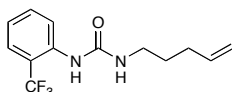

**1-(pent-4-enyl)-3-(2-(trifluoromethyl)phenyl)urea.** Procedure A yielded a white solid (70%);  $R_f = 0.47$  (7:3 Hex/EtOAc);  $^1\text{H NMR}$  (400 MHz,  $\text{CDCl}_3$ )  $\delta$  7.89 (d, 1H,  $J = 7.9$  Hz), 7.56 (d, 1H,  $J = 7.7$  Hz), 7.47 (dd 1H,  $J = 7.7, 7.7$  Hz), 7.20 – 7.16 (m, 2H), 6.85 (m, 1H), 5.75 (ddt, 1H,  $J = 6.6, 10.2, 16.8$  Hz), 5.01 – 4.92 (m, 2H), 3.17 (dt, 2H,  $J = 6.8, 6.8$  Hz), 2.04 (dt, 2H,  $J = 6.8, 6.8$  Hz), 1.56 (tt, 2H,  $J = 7.0, 7.0$  Hz);  $^{13}\text{C NMR}$  (100 MHz,  $\text{CDCl}_3$ )  $\delta$  155.8, 137.9, 136.5, 133.0, 129.6, 126.3, 125.5, 124.0, 120.4, 115.4, 40.2, 31.2, 29.1; IR (Thin Film) 3326, 2938, 1650, 1564, 1456, 1322, 1284, 1175, 1119, 1030  $\text{cm}^{-1}$ ; HRMS (ESI)  $m/e$  calcd ( $\text{M}+\text{H}^+$ ) 273.12092, found 273.12023.

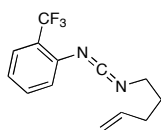

***N*-((pent-4-enylimino)methylene)-2-(trifluoromethyl)aniline (2e).** Procedure A yielded a clear oil (60%);  $R_f = 0.52$  (95:5 Hex/EtOAc);  $^1\text{H NMR}$  (400 MHz,  $\text{CDCl}_3$ )  $\delta$  7.58 (d, 1H,  $J = 7.9$  Hz), 7.46 (dd, 1H,  $J = 7.9, 7.9$  Hz), 7.25 (d, 1H,  $J = 7.7$  Hz), 7.15 (dd, 1H,  $J = 7.7, 7.7$  Hz), 5.79 (ddt, 1H,  $J = 6.8, 10.2, 17.0$  Hz), 5.05 (dm, 1H,  $J = 17.3$  Hz), 5.01 (dm, 1H,  $J = 10.8$  Hz), 3.47 (t, 2H,  $J = 6.8$  Hz), 2.19 (dt, 2H,  $J = 7.0, 7.0$  Hz), 1.78 (tt, 2H,  $J = 7.0, 7.0$  Hz);  $^{13}\text{C NMR}$  (100 MHz,  $\text{CDCl}_3$ )  $\delta$  139.7, 137.3, 132.8, 132.6, 127.0, 126.9, 125.5, 124.1, 122.4, 116.0, 46.0, 30.9, 30.4; IR (Thin Film) 2942, 2151, 1581, 1507, 1462, 1315, 1130, 1056  $\text{cm}^{-1}$ .

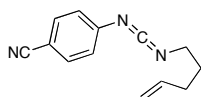

**4-((pent-4-enylimino)methyleneamino)benzonitrile (2f).** After a quick flash chromatography, the crude urea was converted to the target carbodiimide according to Procedure A as an clear oil (25% overall);  $R_f = 0.18$  (95:5 Hex/EtOAc);  $^1\text{H NMR}$  (400 MHz,  $\text{CDCl}_3$ )  $\delta$  7.56 (d, 2H,  $J = 8.3$  Hz), 7.12 (d, 2H,  $J = 8.3$  Hz), 5.79 (ddt, 1H,  $J = 6.6, 10.2, 17.1$  Hz), 5.08 – 5.01 (m, 2H), 3.50 (t, 2H,  $J = 6.8$  Hz), 2.19 (dt, 2H,  $J = 7.0, 7.0$  Hz), 1.79 (tt, 2H,  $J = 7.0, 7.0$  Hz);  $^{13}\text{C NMR}$  (100 MHz,  $\text{CDCl}_3$ )  $\delta$  146.4, 137.0, 133.6, 132.5, 124.3, 119.1, 116.2, 107.7, 46.0, 30.9, 30.4; IR (Thin Film) 2936, 2230, 2150, 1594, 1507, 1340, 1155  $\text{cm}^{-1}$ .

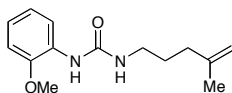

**1-(2-methoxyphenyl)-3-(4-methylpent-4-enyl)urea.** Procedure B yielded a white solid (67%);  $R_f = 0.54$  (1:1 Hex/EtOAc);  $^1\text{H NMR}$  (400 MHz,  $\text{CDCl}_3$ )  $\delta$  8.01 (d, 1H,  $J = 7.7$  Hz), 6.98 – 6.90 (m, 3H), 6.84 (d, 2H,  $J = 7.9$  Hz), 5.15 (m, 1H), 4.70 (s, 1H), 4.67 (s, 1H), 3.82 (s, 3H), 3.25 (dt, 2H,  $J = 6.7, 6.7$  Hz), 2.05 (t, 2H,  $J = 7.6$  Hz), 1.70 (s, 3H), 1.67 (tt, 2H,  $J = 7.3, 7.3$  Hz);  $^{13}\text{C NMR}$  (100 MHz,  $\text{CDCl}_3$ )  $\delta$  155.8, 148.5, 145.3, 128.8, 122.7, 121.4, 120.0, 110.5, 110.4, 55.8, 40.3, 35.2, 28.2, 22.6; IR (Thin Film) 3326, 2938, 1640, 1602, 1558, 1462, 1431, 1246, 1106, 1025  $\text{cm}^{-1}$ ; HRMS (ESI)  $m/e$  calcd ( $\text{M}+\text{H}^+$ ) 249.15975, found 249.15873.

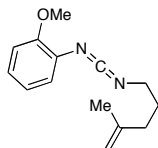

**2-methoxy-*N*-((4-methylpent-4-enylimino)methylene)aniline (5).**

Procedure B yielded a clear oil (68%);  $R_f = 0.34$  (95:5 Hex/EtOAc);  $^1\text{H}$  NMR (400 MHz,  $\text{CDCl}_3$ )  $\delta$  7.07 (ddd, 1H,  $J = 1.5, 7.7, 7.7$  Hz), 7.02 (dd, 1H,  $J = 1.5, 8.3$  Hz), 6.88 – 6.85 (m, 2H), 4.75 (s, 1H), 4.71 (s, 1H), 3.89 (s, 3H), 3.40 (t, 2H,  $J = 6.8$  Hz), 2.15 (t, 2H,  $J = 7.5$  Hz), 1.82 (tt, 2H,  $J = 7.0, 7.0$  Hz), 1.73 (s, 3H);  $^{13}\text{C}$  NMR (100 MHz,  $\text{CDCl}_3$ )  $\delta$  154.1, 144.9, 137.1, 129.2, 125.5, 124.8, 121.2, 111.3, 110.8, 56.0, 46.6, 35.1, 29.2, 22.6; IR (Thin Film) 2940, 2131, 1588, 1501, 1465, 1347, 1245, 1107, 1020  $\text{cm}^{-1}$ .

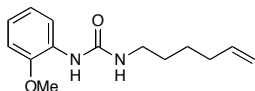

**1-(hex-5-enyl)-3-(2-methoxyphenyl)urea.**

Procedure B yielded a white solid (80%);  $R_f = 0.53$  (1:1 Hex/EtOAc);  $^1\text{H}$  NMR (400 MHz,  $\text{CDCl}_3$ )  $\delta$  8.02 (dd, 1H,  $J = 1.9, 7.7$  Hz), 7.00 (s, 1H), 6.99 – 6.90 (m, 2H), 6.84 (dd, 2H,  $J = 1.7, 7.7$  Hz), 5.77 (ddt, 1H,  $J = 6.8, 10.2, 17.1$  Hz), 5.13 (m, 1H), 4.99 (dm, 1H,  $J = 17.1$  Hz), 4.94 (dm, 1H,  $J = 10.2$  Hz), 3.81 (s, 3H), 3.25 (dt, 2H,  $J = 6.7, 6.7$  Hz), 2.05 (dt, 2H,  $J = 7.0, 7.0$  Hz), 1.58 – 1.48 (m, 2H), 1.46 – 1.38 (m, 2H);  $^{13}\text{C}$  NMR (100 MHz,  $\text{CDCl}_3$ )  $\delta$  155.8, 148.4, 138.7, 128.9, 122.6, 121.4, 119.8, 114.9, 110.3, 55.8, 40.4, 33.6, 29.8, 26.3; IR (Thin Film) 3319, 2931, 1640, 1602, 1551, 1456, 1240, 1214, 1170, 1030  $\text{cm}^{-1}$ ; HRMS (ESI)  $m/e$  calcd ( $\text{M}+\text{H}^+$ ) 249.15975, found 249.15959.

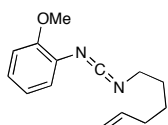

***N*-((hex-5-enylimino)methylene)-2-methoxyaniline (8).**

Procedure B yielded a clear oil (70%);  $R_f = 0.32$  (95:5 Hex/EtOAc);  $^1\text{H}$  NMR (400 MHz,  $\text{CDCl}_3$ )  $\delta$  7.07 (dd, 1H,  $J = 7.5, 7.5$  Hz), 7.02 (d, 1H,  $J = 8.1$  Hz), 6.89 – 6.85 (m, 2H), 5.80 (ddt, 1H,  $J = 6.8, 10.2, 17.1$  Hz), 5.01 (dm, 1H,  $J = 17.1$  Hz), 4.96 (dm, 1H,  $J = 10.2$  Hz), 3.88 (s, 3H), 3.40 (t, 2H,  $J = 6.8$  Hz), 2.10 (dt, 2H,  $J = 6.9, 6.9$  Hz), 1.74 – 1.66 (m, 2H), 1.58 – 1.50 (m, 2H);  $^{13}\text{C}$  NMR (100 MHz,  $\text{CDCl}_3$ )  $\delta$  154.1, 138.6, 137.1, 129.2, 125.5, 124.8, 121.2, 115.0, 111.3, 56.1, 47.0, 33.5, 30.8, 26.3; IR (Thin Film) 2936, 2132, 1594, 1501, 1464, 1342, 1242, 1107, 1025  $\text{cm}^{-1}$ .

**General procedure for the Rh-catalyzed [2+2+2] cycloaddition of alkenyl carbodiimides and terminal alkynes:**

A flame-dried round bottom flask was charged with  $[\text{Rh}(\text{C}_2\text{H}_4)_2\text{Cl}]_2$  (1.8 mg, 0.0048 mmol) and the phosphoramidite ligand **L4** (6.5 mg, 0.0097 mmol), and was fitted with a flame-dried reflux condenser in an inert atmosphere ( $\text{N}_2$ ) glove box. Upon removal from the glove box, 1.0 ml toluene was added via syringe and the resulting yellow solution was stirred at ambient temperature under argon flow for 15 minutes. To this solution was added a solution of alkyne **1** (0.322 mmol) and carbodiimide **2**, **5**, or **8** (0.161 mmol) in 1 ml of toluene via syringe or cannula. After an additional 1 ml of toluene to wash down the remaining residue, the resulting solution was heated to 110 °C in an oil bath, and maintained at reflux for *ca.* 3 h. The reaction mixture was cooled to ambient temperature, concentrated in vacuo, and purified by flash column chromatography (gradient elution typically 50:50 Hex:EtOAc, then 100% EtOAc, followed by 60:40:4 Hex:EtOAc:Et<sub>3</sub>N). Evaporation of solvent afforded the analytically pure product **3**, **6**, or **9**. The minor products **4**, **7**, **10** were much more polar (basic), requiring 96:4 EtOAc:Et<sub>3</sub>N for isolation. The minor products were typically a 2:1 or 3:1 mixture of imine isomers, and often

contaminated with other by-products. For characterization purpose, products that can be isolated relatively clean such as **4aa**, **4ab**, **4ac**, **7a**, **4ke**, and **4kc**, analytical data are provided. Others are not provided due to the impurities.

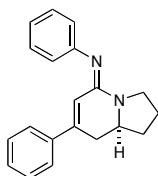

**(S,E)-N-(7-phenyl-2,3,8,8a-tetrahydroindolizin-5(1H)-ylidene)aniline (3aa).** General procedure with alkyne **1a** and carbodiimide **2a** yielded 32.5 mg of the cycloadduct (70%);  $R_f = 0.46$  (96:4 EtOAc/Et<sub>3</sub>N);  $[\alpha]_D^{20} = -430.8$  ( $c = 1$ , CHCl<sub>3</sub>); HPLC analysis – Chiracel OD-H column 85:15 hexane:iPrOH, 1.0 ml/min, Major: 8.34 minutes, Minor: 7.22 minutes, 254 nm detection light,  $ee = 97\%$ ; <sup>1</sup>H NMR (400 MHz, CDCl<sub>3</sub>)  $\delta$  7.37 – 7.26 (m, 7H), 6.99 (t, 1H,  $J = 7.5$  Hz), 6.88 (d, 2H,  $J = 7.5$  Hz), 6.42 (d, 1H,  $J = 2.6$  Hz), 3.78 (m, 1H), 3.70 (m, 1H), 3.64 (m, 1H), 2.92 (dd, 1H,  $J = 4.3, 16.2$  Hz), 2.59 (ddd, 1H,  $J = 2.8, 13.2, 16.0$  Hz), 2.29 (ddd, 1H,  $J = 5.5, 5.5, 11.3$  Hz), 2.14 (m, 1H), 1.94 (m, 1H), 1.75 (m, 1H); <sup>13</sup>C NMR (100 MHz, CDCl<sub>3</sub>)  $\delta$  152.1, 150.7, 145.4, 139.2, 129.0, 128.8, 126.0, 123.4, 122.0, 114.6, 56.4, 45.6, 33.8, 33.7, 23.3; IR (Thin Film) 2959, 1629, 1573, 1454, 1350, 1328 cm<sup>-1</sup>; HRMS (ESI)  $m/e$  calcd (M+H<sup>+</sup>) 289.16992, found 289.16896.

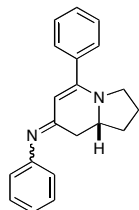

**(R)-N-(5-phenyl-2,3,8,8a-tetrahydroindolizin-7(1H)-ylidene)aniline (4aa).** General procedure with alkyne **1a** and carbodiimide **2a** yielded 8.5 mg of the cycloadduct (18%) as a 3:1 mixture of the imine isomers;  $R_f = 0.28$  (96:4 EtOAc/Et<sub>3</sub>N);  $ee$  not determined; See spectra for its <sup>1</sup>H NMR (400 MHz, CDCl<sub>3</sub>) and <sup>13</sup>C NMR (100 MHz, CDCl<sub>3</sub>); IR (Thin Film) 2967, 1600, 1575, 1489, 1452, 1235, 1111 cm<sup>-1</sup>; HRMS (ESI)  $m/e$  calcd (M+H<sup>+</sup>) 289.16992, found 289.1702.

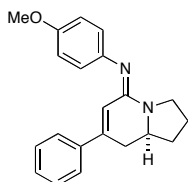

**(S,E)-4-methoxy-N-(7-phenyl-2,3,8,8a-tetrahydroindolizin-5(1H)-ylidene)aniline (3ab).** General procedure with alkyne **1a** and carbodiimide **2b** yielded 36.0 mg of the cycloadduct (70%);  $R_f = 0.43$  (96:4 EtOAc/Et<sub>3</sub>N);  $[\alpha]_D^{20} = -329.0$  ( $c = 1$ , CHCl<sub>3</sub>); HPLC analysis – Chiracel OD-H column 85:15 hexane:iPrOH with 0.1% diethyl amine, 1.0 ml/min, Major: 9.05 minutes, Minor: 8.06 minutes, 254 nm detection light,  $ee = 94\%$ ; <sup>1</sup>H NMR (400 MHz, CDCl<sub>3</sub>)  $\delta$  7.37 – 7.30 (m, 5H), 6.83 – 6.78 (m, 4H), 6.42 (d, 1H,  $J = 2.1$  Hz), 3.79 (s, 3H), 3.75 (m, 1H), 3.68 (m, 1H), 3.60 (m, 1H), 2.90 (dd, 1H,  $J = 4.1, 16.2$  Hz), 2.56 (m, 1H), 2.27 (ddd, 1H,  $J = 5.7, 5.7, 11.5$  Hz), 2.13 (m, 1H), 1.92 (m, 1H), 1.72 (m, 1H); <sup>13</sup>C NMR (100 MHz, CDCl<sub>3</sub>)  $\delta$  155.1, 152.5, 145.1, 144.0, 139.3, 128.9, 128.8, 125.9, 124.1, 114.6, 114.1, 56.4, 55.6, 45.5, 33.8, 33.6, 23.2; IR (Thin Film) 2954, 1627, 1571, 1496, 1446, 1322, 1235 cm<sup>-1</sup>; HRMS (ESI)  $m/e$  calcd (M+H<sup>+</sup>) 319.18048, found 319.17926.

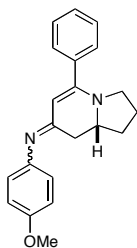

**(R)-4-methoxy-N-(5-phenyl-2,3,8,8a-tetrahydroindolizin-7(1H)-ylidene)aniline (4ab).** General procedure with alkyne **1a** and carbodiimide **2b** yielded 9.2 mg of the cycloadduct (18%) as a 3:1 mixture of the imine isomers;  $R_f = 0.17$  (96:4 EtOAc/Et<sub>3</sub>N);  $ee$  not determined; See spectra for its <sup>1</sup>H NMR (400 MHz, CDCl<sub>3</sub>) and <sup>13</sup>C NMR (100 MHz, CDCl<sub>3</sub>); IR (Thin Film) 2961, 1600, 1581, 1544, 1489, 1452, 1235, 1111 cm<sup>-1</sup>; HRMS (ESI)  $m/e$  calcd (M+H<sup>+</sup>) 319.18048, found 319.1812.



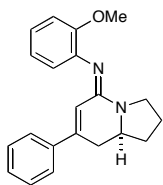

**(*S,E*)-2-methoxy-*N*-(7-phenyl-2,3,8,8a-tetrahydroindolizin-5(1*H*)-ylidene)aniline (3ac).** General procedure with alkyne **1a** and carbodiimide **2c** yielded 35.0 mg of the cycloadduct (68%);  $R_f = 0.49$  (96:4 EtOAc/Et<sub>3</sub>N);  $[\alpha]_D^{20} = -330.1$  ( $c = 1$ , CHCl<sub>3</sub>); HPLC analysis – Chiracel OD-H column 80:20 hexane:iPrOH, 1.0 ml/min, Major: 12.35 minutes, Minor: 8.67 minutes, 210 nm detection light,  $ee = 98\%$ ; <sup>1</sup>H NMR (400 MHz, CDCl<sub>3</sub>)  $\delta$  7.36 – 7.28 (m, 5H), 6.96 (m, 1H), 6.88 – 6.83 (m, 2H), 6.77 (d, 1H,  $J = 7.5$  Hz), 6.34 (m, 1H), 3.83 (m, 1H), 3.81 (s, 3H), 3.75 – 3.63 (m, 2H), 2.89 (dd, 1H,  $J = 4.0, 16.2$  Hz), 2.57 (ddd, 1H,  $J = 2.3, 12.2, 15.8$  Hz), 2.27 (ddd, 1H,  $J = 6.0, 6.0, 11.5$  Hz), 2.12 (m, 1H), 1.92 (m, 1H), 1.73 (m, 1H); <sup>13</sup>C NMR (100 MHz, CDCl<sub>3</sub>)  $\delta$  152.2, 146.1, 139.0, 134.3, 129.7, 129.2, 128.9, 126.0, 123.5, 121.9, 121.7, 114.3, 56.4, 45.5, 33.8, 33.7, 23.2; IR (Thin Film) 2946, 1635, 1579, 1491, 1441, 1328, 1240 cm<sup>-1</sup>; HRMS (ESI)  $m/e$  calcd (M+H<sup>+</sup>) 319.18048, found 319.17991.

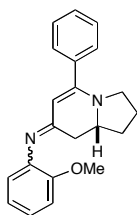

**(*R*)-2-methoxy-*N*-(5-phenyl-2,3,8,8a-tetrahydroindolizin-7(1*H*)-ylidene)aniline (4ac).** General procedure with alkyne **1a** and carbodiimide **2c** yielded 7.2 mg of the cycloadduct (14%) as a 3:1 mixture of the imine isomers;  $R_f = 0.15$  (96:4 EtOAc/Et<sub>3</sub>N);  $ee$  not determined; See spectra for its <sup>1</sup>H NMR (400 MHz, CDCl<sub>3</sub>) and <sup>13</sup>C NMR (100 MHz, CDCl<sub>3</sub>); IR (Thin Film) 2955, 1600, 1575, 1551, 1489, 1452, 1235, 1111 cm<sup>-1</sup>; HRMS (ESI)  $m/e$  calcd (M+H<sup>+</sup>) 319.18048, found 319.1801.

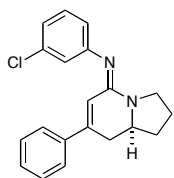

**(*S,E*)-3-chloro-*N*-(7-phenyl-2,3,8,8a-tetrahydroindolizin-5(1*H*)-ylidene)aniline (3ad).** General procedure with alkyne **1a** and carbodiimide **2d** yielded 34.9 mg of the cycloadduct (67%);  $R_f = 0.60$  (96:4 EtOAc/Et<sub>3</sub>N);  $[\alpha]_D^{20} = -391.8$  ( $c = 1$ , CHCl<sub>3</sub>); HPLC analysis – Chiracel AD-H column 99:1 hexane:iPrOH, 1.0 ml/min, Major: 8.90 minutes, Minor: 8.21 minutes, 254 nm detection light,  $ee = 97\%$ ; <sup>1</sup>H NMR (400 MHz, CDCl<sub>3</sub>)  $\delta$  7.36 – 7.32 (m, 5H), 7.15 (dd, 1H,  $J = 7.9, 8.1$  Hz), 6.94 (d, 1H,  $J = 8.1$  Hz), 6.93 (s, 1H), 6.74 (d, 1H,  $J = 7.9$  Hz), 6.36 (d, 1H,  $J = 2.3$  Hz), 3.76 – 3.67 (m, 2H), 3.57 (m, 1H), 2.92 (dd, 1H,  $J = 4.1, 16.2$  Hz), 2.57 (ddd, 1H,  $J = 2.6, 13.6, 16.0$  Hz), 2.28 (m, 1H), 2.13 (m, 1H), 1.93 (m, 1H), 1.74 (m, 1H); <sup>13</sup>C NMR (100 MHz, CDCl<sub>3</sub>)  $\delta$  152.2, 146.1, 139.0, 134.3, 129.7, 129.2, 128.9, 126.0, 123.5, 121.9, 121.7, 114.3, 56.4, 45.5, 33.8, 33.7, 23.3; IR (Thin Film) 2959, 1623, 1573, 1447, 1353, 1328, 1278 cm<sup>-1</sup>; HRMS (ESI)  $m/e$  calcd (M+H<sup>+</sup>) 323.13095, found 323.12911.

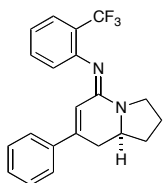

**(*S,E*)-*N*-(7-phenyl-2,3,8,8a-tetrahydroindolizin-5(1*H*)-ylidene)-2-(trifluoromethyl)aniline (3ae).** General procedure with alkyne **1a** and carbodiimide **2e** yielded 47.0 mg of the cycloadduct (82%);  $R_f = 0.56$  (EtOAc);  $[\alpha]_D^{20} = -212.7$  ( $c = 1$ , CHCl<sub>3</sub>); HPLC analysis – Chiracel AD-H column 99:1 hexane:iPrOH, 1.0 ml/min, Major: 5.24 minutes, Minor: 5.54 minutes, 210 nm detection light,  $ee = 97\%$ ; <sup>1</sup>H NMR (400 MHz, CDCl<sub>3</sub>)  $\delta$  7.57 (d, 1H,  $J = 7.7$  Hz), 7.38 – 7.32 (m, 6H), 7.01 (dd, 1H,  $J = 7.5, 7.7$  Hz), 6.81 (d, 1H,  $J = 7.9$  Hz), 6.16 (d, 1H,  $J = 2.6$  Hz), 3.76 – 3.68 (m, 2H), 3.62 (m, 1H), 2.90 (dd, 1H,  $J = 4.3, 16.2$  Hz), 2.58 (m, 1H), 2.29 (m, 1H), 2.13 (m, 1H), 1.94 (m, 1H), 1.75 (m, 1H); <sup>13</sup>C NMR (100 MHz, CDCl<sub>3</sub>)  $\delta$  151.3, 150.2, 146.1, 139.1, 132.1, 129.0, 128.8, 126.5, 126.4,

126.1, 126.0, 124.7, 123.4, 123.1, 121.3, 114.7, 56.4, 45.3, 33.9, 33.7, 23.2; IR (Thin Film) 2963, 1633, 1578, 1559, 1443, 1248, 1126  $\text{cm}^{-1}$ ; HRMS (ESI)  $m/e$  calcd ( $\text{M}+\text{H}^+$ ) 357.15730, found 357.15647.

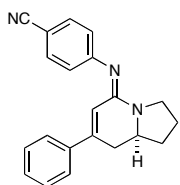

**(*S,E*)-4-(7-phenyl-2,3,8,8a-tetrahydroindolizin-5(1*H*)-ylideneamino)benzonitrile (3af).** General procedure with alkyne **1a** and carbodiimide **2f** in the presence of 5 mol%  $[\text{Rh}(\text{C}_2\text{H}_4)_2\text{Cl}]_2$  and 10 mol% **L4** yielded 28.0 mg of the cycloadduct (55%);  $R_f = 0.12$  (EtOAc);  $[\alpha]_D^{20} = -413.2$  ( $c = 1$ ,  $\text{CHCl}_3$ ); HPLC analysis – Chiracel OD-H column 90:10 hexane:iPrOH, 1.0 ml/min, Major: 11.26 minutes, Minor: 12.37 minutes, 210 nm detection light,  $ee = 92\%$ ;  $^1\text{H}$  NMR (400 MHz,  $\text{CDCl}_3$ )  $\delta$  7.51 (d, 2H,  $J = 8.3$  Hz), 7.38 – 7.34 (m, 5H), 6.88 (d, 2H,  $J = 8.3$  Hz), 6.29 (d, 1H,  $J = 2.6$  Hz), 3.78 – 3.70 (m, 2H), 3.56 (m, 1H), 2.95 (dd, 1H,  $J = 4.3, 16.4$  Hz), 2.60 (ddd, 1H,  $J = 2.8, 13.4, 16.2$  Hz), 2.32 (ddd, 1H,  $J = 6.0, 6.0, 11.9$  Hz), 2.15 (m, 1H), 1.93 (m, 1H), 1.75 (m, 1H);  $^{13}\text{C}$  NMR (100 MHz,  $\text{CDCl}_3$ )  $\delta$  155.7, 152.0, 146.8, 138.7, 133.1, 129.4, 129.0, 125.9, 124.0, 120.4, 114.1, 104.2, 56.3, 45.6, 33.7, 23.2; IR (Thin Film) 2963, 2218, 1626, 1553, 1456, 1322, 1273, 1163  $\text{cm}^{-1}$ ; HRMS (ESI)  $m/e$  calcd ( $\text{M}+\text{H}^+$ ) 314.16468, found 314.16517.

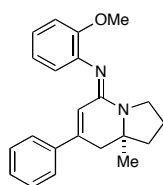

**(*S,E*)-2-methoxy-*N*-(8a-methyl-7-phenyl-2,3,8,8a-tetrahydroindolizin-5(1*H*)-ylidene)aniline (6a).** General procedure with alkyne **1a** and carbodiimide **5** yielded 34.3 mg of the cycloadduct (64%);  $R_f = 0.44$  (96:4 EtOAc/ $\text{Et}_3\text{N}$ );  $[\alpha]_D^{20} = -249.8$  ( $c = 1$ ,  $\text{CHCl}_3$ ); HPLC analysis – Chiracel OD-H column 80:20 hexane:iPrOH, 1.0 ml/min, Major: 6.74 minutes, Minor: 8.76 minutes, 210 nm detection light,  $ee = 99\%$ ;  $^1\text{H}$  NMR (400 MHz,  $\text{CDCl}_3$ )  $\delta$  7.36 – 7.29 (m, 5H), 6.95 (m, 1H), 6.87 – 6.83 (m, 2H), 6.77 (d, 1H,  $J = 7.7$  Hz), 6.30 (m, 1H), 3.79 (s, 3H), 3.79 – 3.65 (m, 2H), 2.83 (d, 1H,  $J = 16.2$  Hz), 2.77 (dd, 1H,  $J = 2.1, 16.2$  Hz), 2.11 – 2.04 (m, 3H), 1.93 (m, 1H), 1.23 (s, 3H);  $^{13}\text{C}$  NMR (100 MHz,  $\text{CDCl}_3$ )  $\delta$  152.3, 151.8, 143.3, 140.4, 139.9, 128.7, 126.0, 124.6, 122.6, 120.8, 114.7, 111.5, 60.2, 55.9, 45.1, 40.9, 40.8, 23.1, 21.7; IR (Thin Film) 2963, 1626, 1578, 1486, 1431, 1236, 1169  $\text{cm}^{-1}$ ; HRMS (ESI)  $m/e$  calcd ( $\text{M}+\text{H}^+$ ) 333.19614, found 333.19614.

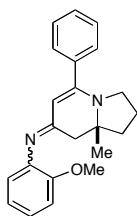

**(*R*)-2-methoxy-*N*-(8a-methyl-5-phenyl-2,3,8,8a-tetrahydroindolizin-7(1*H*)-ylidene)aniline (7a).** General procedure with alkyne **1a** and carbodiimide **5** yielded 10.8 mg of the cycloadduct (20%) as a 2:1 mixture of the imine isomers;  $R_f = 0.36$  (96:4 EtOAc/ $\text{Et}_3\text{N}$ );  $ee$  not determined; See spectra for its  $^1\text{H}$  NMR (400 MHz,  $\text{CDCl}_3$ ) and  $^{13}\text{C}$  NMR (100 MHz,  $\text{CDCl}_3$ ); IR (Thin Film) 2967, 1600, 1575, 1551, 1489, 1452, 1241, 1111  $\text{cm}^{-1}$ ; HRMS (ESI)  $m/e$  calcd ( $\text{M}+\text{H}^+$ ) 333.19614, found 333.1963.

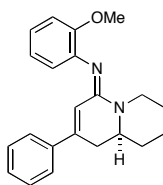

**(*S,E*)-2-methoxy-*N*-(2-phenyl-1*H*-quinolizin-4(6*H*,7*H*,8*H*,9*H*,9*aH*)-ylidene)aniline (9a).** General procedure with alkyne **1a** and carbodiimide **8** in the presence of 5 mol%  $[\text{Rh}(\text{C}_2\text{H}_4)_2\text{Cl}]_2$  and 10 mol% **L4** yielded 23.0 mg of the cycloadduct (43%);  $R_f = 0.55$  (65:35:4 Hex/EtOAc/ $\text{Et}_3\text{N}$ );  $[\alpha]_D^{20} = -240.1$  ( $c = 1$ ,  $\text{CHCl}_3$ ); HPLC analysis – Chiracel OD-H column 85:15 hexane:iPrOH, 1.0 ml/min, Major: 20.39 minutes, Minor: 11.03 minutes, 210 nm

detection light, *ee* = 98%; <sup>1</sup>H NMR (400 MHz, CDCl<sub>3</sub>) δ 7.33 – 7.28 (m, 5H), 6.97 (m, 1H), 6.89 – 6.86 (m, 2H), 6.74 (d, 1H, *J* = 6.6 Hz), 6.26 (d, 1H, *J* = 1.7 Hz), 4.62 (dm, 1H, *J* = 12.8 Hz), 3.79 (s, 3H), 3.37 (m, 1H), 2.78 (dd, 1H, *J* = 4.9, 17.1 Hz), 2.71 (dd, 1H, *J* = 3.2, 13.2 Hz), 2.61 (ddd, 1H, *J* = 1.7, 10.4, 16.8 Hz), 1.87 – 1.80 (m, 3H), 1.72 – 1.42 (m, 3H); <sup>13</sup>C NMR (100 MHz, CDCl<sub>3</sub>) δ 155.8, 151.7, 143.4, 140.4, 139.1, 128.9, 128.7, 125.8, 123.6, 122.8, 121.0, 113.7, 111.6, 56.0, 55.1, 45.3, 34.6, 33.6, 24.8, 24.1; IR (Thin Film) 2930, 1637, 1581, 1489, 1440, 1328, 1260 cm<sup>-1</sup>; HRMS (ESI) *m/e* calcd (M+H<sup>+</sup>) 333.19614, found 333.19535.

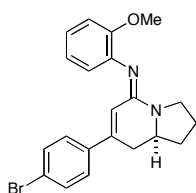

**(*S,E*)-*N*-(7-(4-bromophenyl)-2,3,8,8a-tetrahydroindolizin-5(1*H*)-ylidene)-2-methoxyaniline (3bc).** General procedure with alkyne **1b** and carbodiimide **2c** yielded 47.7 mg of the cycloadduct (75%); *R<sub>f</sub>* = 0.45 (96:4 EtOAc/Et<sub>3</sub>N); [α]<sub>D</sub><sup>20</sup> = - 345.1 (*c* = 1, CHCl<sub>3</sub>); HPLC analysis – Chiracel OD-H column 80:20 hexane:iPrOH, 1.0 ml/min, Major: 12.44 minutes, Minor: 9.03 minutes, 210 nm detection light, *ee* = 98%; <sup>1</sup>H NMR (400 MHz, CDCl<sub>3</sub>) δ 7.43 (d, 2H, *J* = 8.3 Hz), 7.20 (d, 2H, *J* = 8.3 Hz), 6.98 (m, 1H), 6.88 – 6.83 (m, 2H), 6.77 (d, 1H, *J* = 7.2 Hz), 6.32 (m, 1H), 3.86 (m, 1H), 3.80 (s, 3H), 3.75 – 3.63 (m, 2H), 2.83 (dd, 1H, *J* = 4.3, 16.2 Hz), 2.55 (ddd, 1H, *J* = 2.3, 13.2, 15.8 Hz), 2.27 (ddd, 1H, *J* = 6.0, 6.0, 11.5 Hz), 2.24 (m, 1H), 1.92 (m, 1H), 1.72 (m, 1H); <sup>13</sup>C NMR (100 MHz, CDCl<sub>3</sub>) δ 152.4, 143.7, 138.1, 131.9, 127.5, 124.5, 123.0, 120.8, 115.5, 111.3, 56.4, 55.9, 45.7, 33.6, 23.2; IR (Thin Film) 2938, 1620, 1578, 1431, 1320, 1230, 1108 cm<sup>-1</sup>; HRMS (ESI) *m/e* calcd (M+H<sup>+</sup>) 397.09100, found 397.08916. X-ray data is attached at the end of this manuscript.

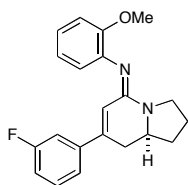

**(*S,E*)-*N*-(7-(3-fluorophenyl)-2,3,8,8a-tetrahydroindolizin-5(1*H*)-ylidene)-2-methoxyaniline (3cc).** General procedure with alkyne **1c** and carbodiimide **2c** yielded 41.9 mg of the cycloadduct (77%); *R<sub>f</sub>* = 0.48 (96:4 EtOAc/Et<sub>3</sub>N); [α]<sub>D</sub><sup>20</sup> = - 359.1 (*c* = 1, CHCl<sub>3</sub>); HPLC analysis – Chiracel OD-H column 80:20 hexane:iPrOH, 1.0 ml/min, Major: 11.83 minutes, Minor: 8.45 minutes, 210 nm detection light, *ee* = 99%; <sup>1</sup>H NMR (400 MHz, CDCl<sub>3</sub>) δ 7.27 (m, 1H), 7.12 (d, 1H, *J* = 7.9 Hz), 7.04 -- 6.95 (m, 3H), 6.88 – 6.83 (m, 2H), 6.74 (dd, 1H, *J* = 1.7, 7.7 Hz), 6.34 (d, 1H, *J* = 2.4 Hz), 3.82 (m, 1H), 3.81 (s, 3H), 3.73 – 3.61 (m, 2H), 2.83 (dd, 1H, *J* = 4.3, 16.2 Hz), 2.55 (ddd, 1H, *J* = 2.6, 13.0, 15.8 Hz), 2.27 (ddd, 1H, *J* = 5.8, 5.8, 11.3 Hz), 2.12 (m, 1H), 1.92 (m, 1H), 1.73 (m, 1H); <sup>13</sup>C NMR (100 MHz, CDCl<sub>3</sub>) δ 164.3, 161.8, 152.2, 152.1, 143.3, 141.8, 141.7, 139.9, 130.3, 130.2, 124.3, 122.8, 121.6, 120.8, 116.2, 115.7, 115.5, 113.0, 112.8, 111.3, 56.3, 55.9, 45.5, 33.8, 33.6, 23.2; IR (Thin Film) 2953, 1636, 1579, 1485, 1435, 1328, 1247, 1109 cm<sup>-1</sup>; HRMS (ESI) *m/e* calcd (M+H<sup>+</sup>) 337.17106, found 337.17014.

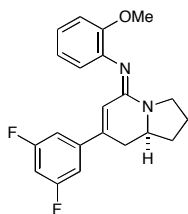

**(*S,E*)-*N*-(7-(3,5-difluorophenyl)-2,3,8,8a-tetrahydroindolizin-5(1*H*)-ylidene)-2-methoxyaniline (3dc).** General procedure with alkyne **1d** and carbodiimide **2c** yielded 37.7 mg of the cycloadduct (66%); *R<sub>f</sub>* = 0.43 (96:4 EtOAc/Et<sub>3</sub>N); [α]<sub>D</sub><sup>20</sup> = - 341.4 (*c* = 1, CHCl<sub>3</sub>); HPLC analysis – Chiracel OD-H column 80:20 hexane:iPrOH, 1.0 ml/min, Major: 11.40 minutes, Minor: 8.20 minutes, 210 nm detection light, *ee* =

99%; <sup>1</sup>H NMR (400 MHz, CDCl<sub>3</sub>) δ 6.98 (m, 1H), 6.89 – 6.86 (m, 4H), 6.75 – 6.71 (m, 2H), 6.33 (d, 1H, *J* = 2.6 Hz), 3.81 (m, 1H), 3.81 (s, 3H), 3.73 – 3.60 (m, 2H), 2.78 (dd, 1H, *J* = 4.3, 16.2 Hz), 2.54 (ddd, 1H, *J* = 2.6, 13.0, 16.0 Hz), 2.27 (ddd, 1H, *J* = 6.2, 6.2, 12.1 Hz), 2.13 (m, 1H), 1.92 (m, 1H), 1.72 (m, 1H); <sup>13</sup>C NMR (100 MHz, CDCl<sub>3</sub>) δ 161.9, 152.2, 151.7, 142.2, 139.7, 124.2, 123.0, 120.8, 117.0, 111.4, 109.0, 108.8, 104.2, 103.9, 103.7, 56.2, 55.9, 45.6, 33.7, 33.6, 23.2; IR (Thin Film) 2938, 1626, 1596, 1443, 1322, 1242, 1120 cm<sup>-1</sup>; HRMS (ESI) *m/e* calcd (M+H<sup>+</sup>) 355.16164, found 355.16026.

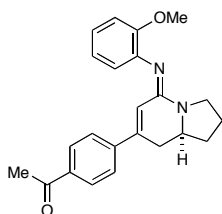

**(*S,E*)-1-(4-(5-(2-methoxyphenylimino)-1,2,3,5,8,8a-hexahydroindolizin-7-yl)phenyl)ethanone (3ec).** General procedure with alkyne **1e** and carbodiimide **2c** yielded 45.2 mg of the cycloadduct (78%); *R<sub>f</sub>* = 0.37 (96:4 EtOAc/Et<sub>3</sub>N); [ $\alpha$ ]<sub>D</sub><sup>20</sup> = -352.8 (*c* = 1, CHCl<sub>3</sub>); HPLC analysis – Chiracel OD-H column 80:20 hexane:iPrOH, 1.0 ml/min, Major: 25.11 minutes, Minor: 17.29 minutes, 210 nm detection light, *ee* = 99%; <sup>1</sup>H NMR (400 MHz, CDCl<sub>3</sub>) δ 7.89 (d, 2H, *J* = 7.0 Hz), 7.42 (d, 2H, *J* = 7.0 Hz), 6.97 (m, 1H), 6.88 – 6.82 (m, 2H), 6.74 (d, 1H, *J* = 7.5 Hz), 6.42 (m, 1H), 3.82 (m, 1H), 3.81 (s, 3H), 3.75 – 3.66 (m, 2H), 2.88 (dd, 1H, *J* = 4.1, 16.0 Hz), 2.59 (m, 1H), 2.57 (s, 3H), 2.28 (ddd, 1H, *J* = 6.6, 6.6, 11.9 Hz), 2.13 (m, 1H), 1.92 (m, 1H), 1.74 (m, 1H); <sup>13</sup>C NMR (100 MHz, CDCl<sub>3</sub>) δ 197.6, 152.2, 152.0, 143.9, 143.3, 139.8, 136.9, 128.8, 126.1, 124.3, 122.9, 120.8, 117.1, 111.3, 56.3, 55.9, 45.6, 33.7, 26.9, 23.2; IR (Thin Film) 2954, 1683, 1627, 1577, 1434, 1353, 1271, 1235, 1116 cm<sup>-1</sup>; HRMS (ESI) *m/e* calcd (M+H<sup>+</sup>) 361.19105, found 361.19049.

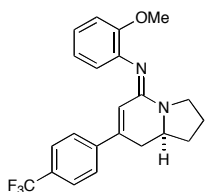

**(*S,E*)-2-methoxy-*N*-(7-(4-(trifluoromethyl)phenyl)-2,3,8,8a-tetrahydroindolizin-5(1*H*)-ylidene)aniline (3fc).** General procedure with alkyne **1f** and carbodiimide **2c** yielded 42.5 mg of the cycloadduct (68%); *R<sub>f</sub>* = 0.44 (96:4 EtOAc/Et<sub>3</sub>N); [ $\alpha$ ]<sub>D</sub><sup>20</sup> = -303.4 (*c* = 1, CHCl<sub>3</sub>); HPLC analysis – Chiracel OD-H column 80:20 hexane:iPrOH, 1.0 ml/min, Major: 9.49 minutes, Minor: 7.13 minutes, 210 nm detection light, *ee* = 96%; <sup>1</sup>H NMR (400 MHz, CDCl<sub>3</sub>) δ 7.56 (d, 2H, *J* = 8.3 Hz), 7.43 (d, 2H, *J* = 8.1 Hz), 6.98 (m, 1H), 6.88 – 6.83 (m, 2H), 6.76 (d, 1H, *J* = 6.8 Hz), 6.38 (d, 1H, *J* = 2.3 Hz), 3.83 (m, 1H), 3.80 (s, 3H), 3.78 – 3.63 (m, 2H), 2.86 (dd, 1H, *J* = 4.3, 16.0 Hz), 2.60 (ddd, 1H, *J* = 2.4, 13.2, 15.8 Hz), 2.28 (ddd, 1H, *J* = 5.8, 5.8, 11.3 Hz), 2.14 (m, 1H), 1.93 (m, 1H), 1.74 (m, 1H); <sup>13</sup>C NMR (100 MHz, CDCl<sub>3</sub>) δ 152.3, 152.0, 143.3, 142.9, 131.1, 130.5, 126.2, 125.7, 125.7, 124.4, 123.1, 120.8, 117.0, 111.4, 56.3, 55.9, 45.7, 33.7, 33.6, 23.2; IR (Thin Film) 2948, 1625, 1581, 1439, 1328, 1235, 1111 cm<sup>-1</sup>; HRMS (ESI) *m/e* calcd (M+H<sup>+</sup>) 387.16787, found 387.16857.

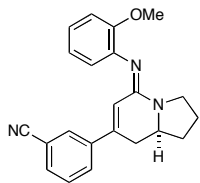

**(*S,E*)-3-(5-(2-methoxyphenylimino)-1,2,3,5,8,8a-hexahydroindolizin-7-yl)benzotrile (3gc).** General procedure with alkyne **1g** and carbodiimide **2c** yielded 34.3 mg of the cycloadduct (62%); *R<sub>f</sub>* = 0.49 (96:4 EtOAc/Et<sub>3</sub>N); [ $\alpha$ ]<sub>D</sub><sup>20</sup> = -280.9 (*c* = 1, CHCl<sub>3</sub>); HPLC analysis – Chiracel OD-H column 80:20 hexane:iPrOH, 1.0 ml/min, Major: 21.14 minutes, Minor: 15.22 minutes, 210 nm detection light, *ee* = 94%; <sup>1</sup>H NMR (400 MHz, CDCl<sub>3</sub>) δ 7.60 (s, 1H), 7.57 – 7.54 (m, 2H), 7.42 (dd, 1H, *J* = 7.9, 7.9 Hz), 6.98 (m, 1H), 6.89 – 6.84 (m, 2H), 6.73 (dd, 1H, *J* = 7.5 Hz), 6.35 (d, 1H, *J* = 2.3

Hz), 3.82 (m, 1H), 3.81 (s, 3H), 3.76 – 3.61 (m, 2H), 2.82 (dd, 1H,  $J = 4.3, 16.2$  Hz), 2.59 (ddd, 1H,  $J = 2.6, 13.2, 15.8$  Hz), 2.28 (m, 1H), 2.12 (m, 1H), 1.93 (m, 1H), 1.74 (m, 1H);  $^{13}\text{C}$  NMR (100 MHz,  $\text{CDCl}_3$ )  $\delta$  152.2, 151.7, 142.2, 140.8, 139.7, 132.0, 130.2, 129.7, 129.5, 124.2, 123.0, 120.9, 118.7, 117.1, 113.1, 111.4, 56.2, 55.9, 45.6, 33.7, 33.6, 23.2; IR (Thin Film) 2953, 2225, 1629, 1573, 1485, 1435, 1328, 1234, 1115  $\text{cm}^{-1}$ ; HRMS (ESI)  $m/e$  calcd ( $\text{M}+\text{H}^+$ ) 344.17573, found 344.17469.

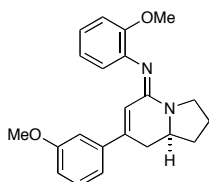

**(*S,E*)-2-methoxy-*N*-(7-(3-methoxyphenyl)-2,3,8,8a-tetrahydroindolizin-5(1*H*)-ylidene)aniline (3hc).** General procedure with alkyne **1h** and carbodiimide **2c** yielded 38.8 mg of the cycloadduct (69%);  $R_f = 0.40$  (96:4 EtOAc/Et<sub>3</sub>N);  $[\alpha]_D^{20} = -280.9$  ( $c = 1$ ,  $\text{CHCl}_3$ ); HPLC analysis – Chiracel OD-H column 80:20 hexane:iPrOH, 1.0 ml/min, Major: 15.51 minutes, Minor: 11.07 minutes, 210 nm detection light,  $ee = 99\%$ ;  $^1\text{H}$  NMR (400 MHz,  $\text{CDCl}_3$ )  $\delta$  7.23 (dd, 1H,  $J = 7.9, 7.9$  Hz), 6.98 – 6.93 (m, 2H), 6.87 – 6.84 (m, 2H), 6.83 (s, 1H), 6.77 (dd, 1H,  $J = 7.5$  Hz), 6.33 (m, 1H), 3.82 (m, 1H), 3.81 (s, 3H), 3.78 (s, 3H), 3.76 – 3.63 (m, 2H), 2.86 (dd, 1H,  $J = 4.3, 16.2$  Hz), 2.56 (ddd, 1H,  $J = 2.1, 13.0, 15.6$  Hz), 2.26 (ddd, 1H,  $J = 6.0, 6.0, 11.7$  Hz), 2.12 (m, 1H), 1.92 (m, 1H), 1.73 (m, 1H);  $^{13}\text{C}$  NMR (100 MHz,  $\text{CDCl}_3$ )  $\delta$  159.8, 152.5, 152.4, 144.7, 140.9, 129.8, 124.5, 122.9, 120.8, 118.5, 115.5, 113.8, 112.0, 111.3, 56.4, 55.9, 55.5, 45.7, 33.9, 33.6, 23.2; IR (Thin Film) 2947, 1633, 1583, 1490, 1440, 1328, 1253, 1116  $\text{cm}^{-1}$ ; HRMS (ESI)  $m/e$  calcd ( $\text{M}+\text{H}^+$ ) 349.19105, found 349.19044.

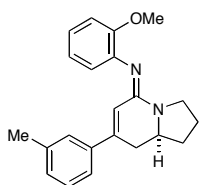

**(*S,E*)-2-methoxy-*N*-(7-*m*-tolyl-2,3,8,8a-tetrahydroindolizin-5(1*H*)-ylidene)aniline (3ic).** General procedure with alkyne **1i** and carbodiimide **2c** yielded 32.8 mg of the cycloadduct (61%);  $R_f = 0.47$  (96:4 EtOAc/Et<sub>3</sub>N);  $[\alpha]_D^{20} = -349.2$  ( $c = 1$ ,  $\text{CHCl}_3$ ); HPLC analysis – Chiracel OD-H column 80:20 hexane:iPrOH, 1.0 ml/min, Major: 11.50 minutes, Minor: 8.21 minutes, 210 nm detection light,  $ee = 98\%$ ;  $^1\text{H}$  NMR (400 MHz,  $\text{CDCl}_3$ )  $\delta$  7.2 – 7.16 (m, 3H), 7.11 (d, 1H,  $J = 7.3$  Hz), 6.97 (m, 1H), 6.88 – 6.83 (m, 2H), 6.78 (d, 1H,  $J = 7.5$  Hz), 6.32 (d, 1H,  $J = 2.1$  Hz), 3.84 (m, 1H), 3.82 (s, 3H), 3.74 – 3.63 (m, 2H), 2.88 (dd, 1H,  $J = 4.3, 16.2$  Hz), 2.57 (ddd, 1H,  $J = 2.6, 13.2, 16.0$  Hz), 2.32 (s, 3H), 2.26 (ddd, 1H,  $J = 5.8, 5.8, 11.7$  Hz), 2.12 (m, 1H), 1.92 (m, 1H), 1.73 (m, 1H);  $^{13}\text{C}$  NMR (100 MHz,  $\text{CDCl}_3$ )  $\delta$  152.6, 152.4, 145.0, 139.4, 138.4, 129.6, 128.7, 126.7, 124.5, 123.1, 122.8, 120.8, 115.1, 111.2, 56.4, 55.9, 45.7, 33.9, 33.7, 23.2, 21.7; IR (Thin Film) 2942, 1631, 1569, 1489, 1439, 1322, 1235, 1114  $\text{cm}^{-1}$ ; HRMS (ESI)  $m/e$  calcd ( $\text{M}+\text{H}^+$ ) 333.19614, found 333.19545.

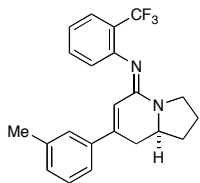

**(*S,E*)-*N*-(7-*m*-tolyl-2,3,8,8a-tetrahydroindolizin-5(1*H*)-ylidene)-2-(trifluoromethyl)aniline (3ie).** General procedure with alkyne **1i** and carbodiimide **2e** yielded 44.0 mg of the cycloadduct (74%);  $R_f = 0.51$  (EtOAc);  $[\alpha]_D^{20} = -230.2$  ( $c = 1$ ,  $\text{CHCl}_3$ ); HPLC analysis – Chiracel AD-H column 99:1 hexane:iPrOH, 1.0 ml/min, Major: 4.81 minutes, Minor: 5.41 minutes, 210 nm detection light,  $ee = 98\%$ ;  $^1\text{H}$  NMR (400 MHz,  $\text{CDCl}_3$ )  $\delta$  7.55 (d, 1H,  $J = 7.5$  Hz), 7.33 (dd, 1H,  $J = 7.6, 7.6$  Hz), 7.18 (dd, 1H,  $J = 7.0, 7.0$  Hz), 7.14 – 7.08 (m, 3H), 6.98 (dd, 1H,  $J = 7.5, 7.5$  Hz), 6.79 (d, 1H,  $J = 7.5$  Hz), 6.11 (m,

1H), 3.74 – 3.65 (m, 2H), 3.58 (m, 1H), 2.86 (dm, 1H,  $J = 6.4$  Hz), 2.55 (m, 1H), 2.30 (s, 3H), 2.25 (m, 1H), 2.10 (m, 1H), 1.91 (m, 1H), 1.72 (m, 1H);  $^{13}\text{C}$  NMR (100 MHz,  $\text{CDCl}_3$ )  $\delta$  151.4, 146.3, 139.2, 138.4, 132.1, 129.8, 128.7, 126.6, 126.5, 126.4, 124.7, 123.1, 121.2, 114.5, 56.4, 45.3, 34.1, 33.7, 23.2, 21.6; IR (Thin Film) 2961, 1631, 1594, 1563, 1439, 1310, 1124  $\text{cm}^{-1}$ ; HRMS (ESI)  $m/e$  calcd ( $\text{M}+\text{H}^+$ ) 371.17296, found 371.1734.

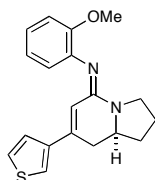

**(*S,E*)-2-methoxy-*N*-(7-(thiophen-3-yl)-2,3,8,8a-tetrahydroindolizin-5(1*H*)-ylidene)aniline (3jc).** General procedure with alkyne **1j** and carbodiimide **2c** yielded 30.6 mg of the cycloadduct (58%);  $R_f = 0.46$  (96:4 EtOAc/ $\text{Et}_3\text{N}$ );  $[\alpha]_D^{20} = -311.5$  ( $c = 1$ ,  $\text{CHCl}_3$ ); HPLC analysis – Chiracel OD-H column 80:20 hexane:*i*PrOH, 1.0 ml/min, Major: 16.30 minutes, Minor: 10.22 minutes, 210 nm detection light,  $ee = 98\%$ ;  $^1\text{H}$  NMR (400 MHz,  $\text{CDCl}_3$ )  $\delta$  7.30 – 7.26 (m, 2H), 7.10 (d, 1H,  $J = 4.9$  Hz), 6.98 (m, 1H), 6.88 – 6.86 (m, 2H), 6.78 (d, 1H,  $J = 7.5$  Hz), 6.32 (m, 1H), 3.82 (m, 1H), 3.80 (s, 3H), 3.72 – 3.64 (m, 2H), 2.89 (dd, 1H,  $J = 4.0, 16.2$  Hz), 2.50 (ddd, 1H,  $J = 1.7, 10.2, 15.3$  Hz), 2.27 (ddd, 1H,  $J = 5.8, 5.8, 11.3$  Hz), 2.10 (m, 1H), 1.91 (m, 1H), 1.72 (m, 1H);  $^{13}\text{C}$  NMR (100 MHz,  $\text{CDCl}_3$ )  $\delta$  152.8, 152.4, 141.0, 139.3, 126.6, 125.4, 124.9, 122.8, 120.8, 113.8, 111.3, 56.2, 55.9, 45.7, 33.6, 23.2; IR (Thin Film) 2948, 1625, 1575, 1495, 1439, 1328, 1235, 1111  $\text{cm}^{-1}$ ; HRMS (ESI)  $m/e$  calcd ( $\text{M}+\text{H}^+$ ) 325.13691, found 325.13691.

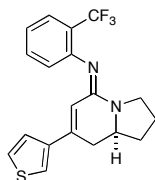

**(*S,E*)-*N*-(7-(thiophen-3-yl)-2,3,8,8a-tetrahydroindolizin-5(1*H*)-ylidene)-2-(trifluoromethyl)aniline (3je).** General procedure with alkyne **1j** and carbodiimide **2e** yielded 46.1 mg of the cycloadduct (79%);  $R_f = 0.46$  (EtOAc);  $[\alpha]_D^{20} = -265.9$  ( $c = 1$ ,  $\text{CHCl}_3$ ); HPLC analysis – Chiracel AD-H column 99:1 hexane(with 0.01% diethyl amine):*i*PrOH, 1.0 ml/min, Major: 6.31 minutes, Minor: 6.66 minutes, 254 nm detection light,  $ee = 97\%$ ;  $^1\text{H}$  NMR (400 MHz,  $\text{CDCl}_3$ )  $\delta$  7.55 (d, 1H,  $J = 6.8$  Hz), 7.34 (dd, 1H,  $J = 7.5, 7.5$  Hz), 7.25 – 7.23 (m, 2H), 7.04 (m, 1H), 6.99 (dd, 1H,  $J = 7.5, 7.5$  Hz), 6.78 (d, 1H,  $J = 7.5$  Hz), 6.11 (m, 1H), 3.74 – 3.64 (m, 2H), 3.57 (m, 1H), 2.88 (dm, 1H,  $J = 16.2$  Hz), 2.49 (m, 1H), 2.26 (m, 1H), 2.08 (m, 1H), 1.91 (m, 1H), 1.71 (m, 1H);  $^{13}\text{C}$  NMR (100 MHz,  $\text{CDCl}_3$ )  $\delta$  151.6, 140.8, 132.1, 126.7, 126.4, 125.3, 124.7, 123.1, 121.3, 113.1, 56.2, 45.4, 33.8, 33.7, 23.1; IR (Thin Film) 2967, 1631, 1587, 1563, 1439, 1315, 1247, 1123, 1031  $\text{cm}^{-1}$ ; HRMS (ESI)  $m/e$  calcd ( $\text{M}+\text{H}^+$ ) 363.11373, found 363.11471.

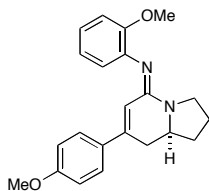

**(*S,E*)-2-methoxy-*N*-(7-(4-methoxyphenyl)-2,3,8,8a-tetrahydroindolizin-5(1*H*)-ylidene)aniline (3kc).** General procedure with alkyne **1k** and carbodiimide **2c** yielded 11.2 mg of the cycloadduct (20%);  $R_f = 0.43$  (96:4 EtOAc/ $\text{Et}_3\text{N}$ );  $[\alpha]_D^{20} = -165.2$  ( $c = 0.73$ ,  $\text{CHCl}_3$ ); HPLC analysis – Chiracel OD-H column 80:20 hexane:*i*PrOH, 1.0 ml/min, Major: 18.71 minutes, Minor: 12.56 minutes, 210 nm detection light,  $ee = 99\%$ ;  $^1\text{H}$  NMR (400 MHz,  $\text{CDCl}_3$ )  $\delta$  7.31 (d, 2H,  $J = 8.8$  Hz), 6.98 (m, 1H), 6.88 – 6.78 (m, 5H), 6.27 (m, 1H), 3.85 (m, 1H), 3.81 (s, 3H), 3.80 (s, 3H), 3.75 – 3.66 (m, 2H), 2.89 (dd, 1H,  $J = 4.0, 16.0$  Hz), 2.52 (ddd, 1H,  $J = 2.4, 11.6, 16.0$  Hz), 2.27 (ddd, 1H,  $J = 6.0, 6.0, 11.2$  Hz), 2.12 (m, 1H), 1.92 (m, 1H), 1.73 (m, 1H);  $^{13}\text{C}$  NMR (100 MHz,  $\text{CDCl}_3$ )  $\delta$  171.0, 160.3, 152.9, 152.5, 140.1, 131.4, 127.3,

124.7, 122.9, 120.8, 114.1, 113.3, 111.3, 56.5, 55.9, 55.5, 45.8, 33.6, 23.2; IR (Thin Film) 2954, 1627, 1577, 1515, 1440, 1241, 1179, 1116  $\text{cm}^{-1}$ ; HRMS (ESI)  $m/e$  calcd ( $\text{M}+\text{H}^+$ ) 349.19105, found 349.18953.

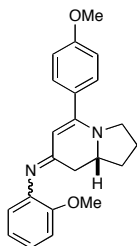

**(R)-2-methoxy-N-(5-(4-methoxyphenyl)-2,3,8,8a-tetrahydroindolizin-7(1H)-ylidene)aniline (4kc).** General procedure with alkyne **1k** and carbodiimide **2c** yielded 29.3 mg of the cycloadduct (52%) as a 2:1 mixture of the imine isomers;  $R_f = 0.17$  (96:4 EtOAc/Et<sub>3</sub>N); *ee* not determined; See spectra for its <sup>1</sup>H NMR (400 MHz, CDCl<sub>3</sub>) and <sup>13</sup>C NMR (100 MHz, CDCl<sub>3</sub>); IR (Thin Film) 2954, 1602, 1577, 1509, 1453, 1247, 1172, 1116  $\text{cm}^{-1}$ ; HRMS (ESI)  $m/e$  calcd ( $\text{M}+\text{H}^+$ ) 349.19105, found 349.18960.

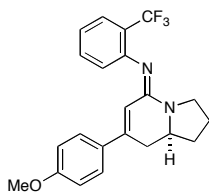

**(S,E)-N-(7-(4-methoxyphenyl)-2,3,8,8a-tetrahydroindolizin-5(1H)-ylidene)-2-(trifluoromethyl)aniline (3ke).** General procedure with alkyne **1k** and carbodiimide **2e** yielded 23.0 mg of the cycloadduct (37%);  $R_f = 0.79$  (96:4 EtOAc/Et<sub>3</sub>N);  $[\alpha]_D^{20} = -236.7$  ( $c = 1.0$ , CHCl<sub>3</sub>); HPLC analysis – Chiracel AD-H column 90:10 hexane:iPrOH, 1.0 ml/min, Major: 4.98 minutes, Minor: 5.45 minutes, 210 nm detection light, *ee* = 96%; <sup>1</sup>H NMR (400 MHz, CDCl<sub>3</sub>)  $\delta$  7.55 (d, 1H,  $J = 7.9$  Hz), 7.34 (dd, 1H,  $J = 7.7, 7.7$  Hz), 7.32 – 7.23 (m, 2H), 6.98 (dd, 1H,  $J = 7.6, 7.6$  Hz), 6.84 – 6.78 (m, 3H), 6.60 (m, 1H), 3.77 (s, 3H), 3.75 – 3.63 (m, 2H), 3.58 (m, 1H), 2.87 (dd, 1H,  $J = 4.0, 16.2$  Hz), 2.41 (m, 1H), 2.25 (m, 1H), 2.09 (m, 1H), 1.91 (m, 1H), 1.72 (m, 1H); <sup>13</sup>C NMR (100 MHz, CDCl<sub>3</sub>)  $\delta$  160.4, 151.6, 145.5, 132.1, 131.3, 127.3, 126.4, 124.8, 121.2, 114.1, 112.9, 56.4, 55.6, 45.3, 33.8, 33.7, 23.2; IR (Thin Film) 2945, 1631, 1557, 1510, 1439, 1247, 1179, 1124  $\text{cm}^{-1}$ ; HRMS (ESI)  $m/e$  calcd ( $\text{M}+\text{H}^+$ ) 387.16787, found 387.16883.

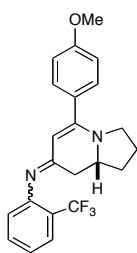

**(R)-N-(5-(4-methoxyphenyl)-2,3,8,8a-tetrahydroindolizin-7(1H)-ylidene)-2-(trifluoromethyl)aniline (4ke).** General procedure with alkyne **1k** and carbodiimide **2e** yielded 22.3 mg of the cycloadduct (36%) as a 3:1 mixture of the imine isomers;  $R_f = 0.56$  (96:4 EtOAc/Et<sub>3</sub>N); *ee* not determined; See spectra for its <sup>1</sup>H NMR (400 MHz, CDCl<sub>3</sub>) and <sup>13</sup>C NMR (100 MHz, CDCl<sub>3</sub>); IR (Thin Film) 2961, 1600, 1563, 1513, 1443, 1247, 1172, 1117  $\text{cm}^{-1}$ ; HRMS (ESI)  $m/e$  calcd ( $\text{M}+\text{H}^+$ ) 387.16787, found 387.16797.

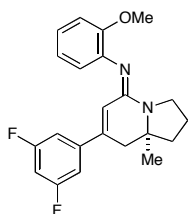

**(S,E)-N-(7-(3,5-difluorophenyl)-8a-methyl-2,3,8,8a-tetrahydroindolizin-5(1H)-ylidene)-2-methoxyaniline (6d).** General procedure with alkyne **1d** and carbodiimide **5** yielded 47.0 mg of the cycloadduct (79%);  $R_f = 0.53$  (96:4 EtOAc/Et<sub>3</sub>N);  $[\alpha]_D^{20} = -253.6$  ( $c = 1$ , CHCl<sub>3</sub>); HPLC analysis – Chiracel OD-H column 80:20 hexane:iPrOH, 1.0 ml/min, Major: 6.41 minutes, Minor: 7.96 minutes, 210 nm detection light, *ee* = 98%; <sup>1</sup>H NMR (400 MHz, CDCl<sub>3</sub>)  $\delta$  6.97 (m, 1H), 6.88 – 6.83 (m, 4H), 6.75 – 6.70 (m, 2H), 6.29 (m, 1H), 3.78 (s, 3H), 3.78 – 3.64 (m, 2H), 2.76 – 2.68 (m, 2H), 2.11 – 2.06 (m, 3H), 1.93 (m, 1H), 1.21 (s, 3H); <sup>13</sup>C NMR (100 MHz, CDCl<sub>3</sub>)  $\delta$  164.4, 162.1, 152.1, 151.0, 124.4, 122.9, 120.9, 116.3, 111.6, 109.0, 108.8,

104.2, 103.9, 103.7, 60.1, 55.9, 45.1, 40.8, 40.6, 23.2, 21.7; IR (Thin Film) 2969, 1626, 1585, 1571, 1431, 1242, 1174, 1120  $\text{cm}^{-1}$ ; HRMS (ESI)  $m/e$  calcd ( $\text{M}+\text{H}^+$ ) 369.17729, found 369.17689.

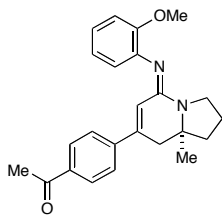

**(*S,E*)-1-(4-(5-(2-methoxyphenylimino)-8a-methyl-1,2,3,5,8,8a-hexahydroindolizin-7-yl)phenyl)ethanone (6e).** General procedure with alkyne **1e** and carbodiimide **5** yielded 45.0 mg of the cycloadduct (74%);  $R_f = 0.43$  (96:4 EtOAc/Et<sub>3</sub>N);  $[\alpha]_D^{20} = -245.8$  ( $c = 1$ , CHCl<sub>3</sub>); HPLC analysis – Chiracel OD-H column 80:20 hexane:iPrOH, 1.0 ml/min, Major: 13.21 minutes, Minor: 16.64 minutes, 210 nm detection light,  $ee = 99\%$ ; <sup>1</sup>H NMR (400 MHz, CDCl<sub>3</sub>)  $\delta$  7.90 (d, 2H,  $J = 8.5$  Hz), 7.42 (d, 2H,  $J = 8.1$  Hz), 6.96 (m, 1H), 6.88 – 6.84 (m, 2H), 6.76 (d, 1H,  $J = 7.5$  Hz), 6.38 (m, 1H), 3.79 (s, 3H), 3.79 – 3.65 (m, 2H), 2.83 – 2.78 (m, 2H), 2.58 (s, 3H), 2.14 – 2.06 (m, 3H), 1.93 (m, 1H), 1.23 (s, 3H); <sup>13</sup>C NMR (100 MHz, CDCl<sub>3</sub>)  $\delta$  197.6, 152.2, 151.3, 144.4, 142.1, 140.2, 136.9, 128.8, 126.1, 124.5, 122.8, 120.9, 116.5, 111.5, 60.1, 55.9, 45.1, 40.9, 40.6, 26.9, 23.2, 21.7; IR (Thin Film) 2967, 1680, 1625, 1569, 1427, 1266, 1111  $\text{cm}^{-1}$ ; HRMS (ESI)  $m/e$  calcd ( $\text{M}+\text{H}^+$ ) 375.20670, found 375.20550.

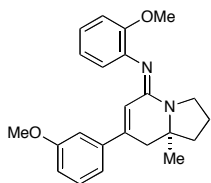

**(*S,E*)-2-methoxy-*N*-(7-(3-methoxyphenyl)-8a-methyl-2,3,8,8a-tetrahydroindolizin-5(1*H*)-ylidene)aniline (6h).** General procedure with alkyne **1h** and carbodiimide **5** yielded 38.7 mg of the cycloadduct (66%);  $R_f = 0.49$  (96:4 EtOAc/Et<sub>3</sub>N);  $[\alpha]_D^{20} = -244.0$  ( $c = 1$ , CHCl<sub>3</sub>); HPLC analysis – Chiracel OD-H column 80:20 hexane:iPrOH, 1.0 ml/min, Major: 7.95 minutes, Minor: 10.68 minutes, 210 nm detection light,  $ee = 96\%$ ; <sup>1</sup>H NMR (400 MHz, CDCl<sub>3</sub>)  $\delta$  7.23 (dd, 1H,  $J = 8.0, 8.0$  Hz), 6.96 – 6.92 (m, 2H), 6.86 – 6.82 (m, 4H), 6.77 (d, 1H,  $J = 7.7$  Hz), 6.29 (m, 1H), 3.79 (s, 3H), 3.78 (s, 3H), 3.78 – 3.63 (m, 2H), 2.81 – 2.73 (m, 2H), 2.11 – 2.06 (m, 3H), 1.92 (m, 1H), 1.22 (s, 3H); <sup>13</sup>C NMR (100 MHz, CDCl<sub>3</sub>)  $\delta$  170.6, 159.8, 152.3, 151.7, 143.2, 141.4, 129.8, 124.6, 122.6, 120.8, 118.5, 115.0, 113.7, 112.1, 111.4, 60.2, 55.9, 55.5, 45.1, 40.9, 23.1, 21.7; IR (Thin Film) 2957, 1626, 1577, 1492, 1430 1242, 1162, 1108  $\text{cm}^{-1}$ ; HRMS (ESI)  $m/e$  calcd ( $\text{M}+\text{H}^+$ ) 363.20670, found 363.20638.

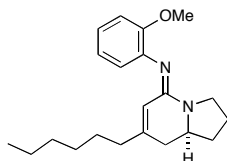

**(*S,E*)-*N*-(7-hexyl-2,3,8,8a-tetrahydroindolizin-5(1*H*)-ylidene)-2-methoxyaniline (3lc).** General procedure with alkyne **1l** and carbodiimide **2c** in the presence of 5 mol% [Rh(C<sub>2</sub>H<sub>4</sub>)<sub>2</sub>Cl]<sub>2</sub> and 10 mol% **L4** yielded 38.8 mg of the cycloadduct (74%);  $R_f = 0.41$  (96:4 EtOAc/Et<sub>3</sub>N);  $[\alpha]_D^{20} = -211.9$  ( $c = 1$ , CHCl<sub>3</sub>); HPLC analysis – Chiracel OD-H column 85:15 hexane:iPrOH, 1.0 ml/min, Major: 8.59 minutes, Minor: 7.05 minutes, 230 nm detection light,  $ee = 91\%$ ; <sup>1</sup>H NMR (400 MHz, CDCl<sub>3</sub>)  $\delta$  6.96 (m, 1H), 6.85 – 6.82 (m, 2H), 6.74 (d, 1H,  $J = 7.0$  Hz), 5.72 (m, 1H), 3.79 (s, 3H), 3.77 (m, 1H), 3.62 – 3.51 (m, 2H), 2.29 (dd, 1H,  $J = 4.5, 16.2$  Hz), 2.18 – 2.14 (m, 2H), 2.10 – 2.05 (m, 3H), 1.85 (m, 1H), 1.61 (m, 1H), 1.37 – 1.21 (m, 8H), 0.86 (t, 3H,  $J = 6.8$  Hz); <sup>13</sup>C NMR (100 MHz, CDCl<sub>3</sub>)  $\delta$  152.8, 152.4, 149.3, 124.5, 122.5, 120.6, 114.5, 111.2, 56.5, 55.8, 45.5, 37.2, 34.7, 33.6, 31.8, 29.0, 27.2, 23.2, 22.8, 14.3; IR (Thin Film) 2928,



1651, 1583, 1490, 1440, 1322, 1247, 1116  $\text{cm}^{-1}$ ; HRMS (ESI)  $m/e$  calcd ( $\text{M}+\text{H}^+$ ) 327.24309, found 327.24281.

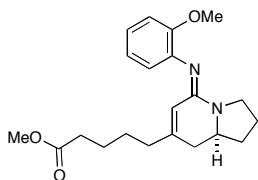

**(*S,E*)-methyl 5-(5-(2-methoxyphenylimino)-1,2,3,5,8,8a-hexahydroindolizin-7-yl)pentanoate (3mc).** General procedure with alkyne **1m** and carbodiimide **2c** in the presence of 5 mol%  $[\text{Rh}(\text{C}_2\text{H}_4)_2\text{Cl}]_2$  and 10 mol% **L4** yielded 39.0 mg of the cycloadduct (68%);  $R_f = 0.42$  (96:4 EtOAc/Et<sub>3</sub>N);  $[\alpha]_D^{20} = -212.4$  ( $c = 1$ ,  $\text{CHCl}_3$ ); HPLC analysis – Chiracel OD-H column 85:15 hexane:iPrOH, 1.0 ml/min, Major: 19.00 minutes, Minor: 13.29 minutes, 230 nm detection light,  $ee = 92\%$ ;  $^1\text{H}$  NMR (400 MHz,  $\text{CDCl}_3$ )  $\delta$  6.93 (m, 1H), 6.85 – 6.81 (m, 2H), 6.70 (d, 1H,  $J = 7.7$  Hz), 5.73 (m, 1H), 3.78 (s, 3H), 3.73 (m, 1H), 3.64 (s, 3H), 3.61 – 3.51 (m, 2H), 2.30 – 2.25 (m, 3H), 2.19 – 2.14 (m, 2H), 2.10 – 2.03 (m, 3H), 1.84 (m, 1H), 1.64 – 1.54 (m, 3H), 1.44 – 1.38 (m, 2H);  $^{13}\text{C}$  NMR (100 MHz,  $\text{CDCl}_3$ )  $\delta$  174.1, 152.6, 152.3, 148.1, 140.3, 124.4, 122.4, 120.6, 115.0, 111.2, 56.4, 55.8, 51.7, 45.4, 36.8, 34.6, 33.9, 33.6, 26.7, 24.5, 23.2; IR (Thin Film) 2942, 1736, 1649, 1575, 1489, 1439, 1328, 1235, 1173  $\text{cm}^{-1}$ ; HRMS (ESI)  $m/e$  calcd ( $\text{M}+\text{H}^+$ ) 357.21726, found 357.21669.

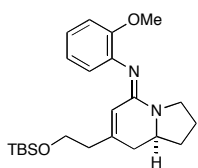

**(*S,E*)-*N*-(7-(2-(*tert*-butyldimethylsilyloxy)ethyl)-2,3,8,8a-tetrahydroindolizin-5(1*H*)-ylidene)-2-methoxyaniline (3nc).** General procedure with alkyne **1n** and carbodiimide **2c** in the presence of 5 mol%  $[\text{Rh}(\text{C}_2\text{H}_4)_2\text{Cl}]_2$  and 10 mol% **L4** yielded 49.3 mg of the cycloadduct (76%);  $R_f = 0.48$  (96:4 EtOAc/Et<sub>3</sub>N);  $[\alpha]_D^{20} = -169.9$  ( $c = 1$ ,  $\text{CHCl}_3$ ); HPLC analysis – Chiracel OD-H column 85:15 hexane:iPrOH, 1.0 ml/min, Major: 8.24 minutes, Minor: 5.98 minutes, 230 nm detection light,  $ee = 96\%$ ;  $^1\text{H}$  NMR (400 MHz,  $\text{CDCl}_3$ )  $\delta$  6.93 (m, 1H), 6.84 – 6.81 (m, 2H), 6.70 (d, 1H,  $J = 7.7$  Hz), 5.78 (d, 1H,  $J = 1.7$  Hz), 3.79 (s, 3H), 3.73 (m, 1H), 3.65 (m, 2H), 3.62 – 3.52 (m, 2H), 2.38 (dd, 1H,  $J = 4.3, 16.4$  Hz), 2.28 (t, 2H,  $J = 6.4$  Hz), 2.21 – 2.13 (m, 2H), 2.04 (m, 1H), 1.85 (m, 1H), 1.60 (m, 1H), 0.85 (s, 9H), 0.003 (s, 6H);  $^{13}\text{C}$  NMR (100 MHz,  $\text{CDCl}_3$ )  $\delta$  152.6, 152.4, 146.4, 140.3, 124.4, 122.4, 120.7, 116.0, 111.2, 61.8, 56.3, 55.8, 45.4, 40.4, 35.3, 33.6, 26.1, 23.1, 18.4, -5.22; IR (Thin Film) 2947, 1652, 1577, 1490, 1465, 1434, 1328, 1253, 1097  $\text{cm}^{-1}$ ; HRMS (ESI)  $m/e$  calcd ( $\text{M}+\text{H}^+$ ) 401.26188, found 401.26217.

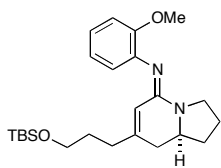

**(*S,E*)-*N*-(7-(3-(*tert*-butyldimethylsilyloxy)propyl)-2,3,8,8a-tetrahydroindolizin-5(1*H*)-ylidene)-2-methoxyaniline (3oc).** General procedure with alkyne **1o** and carbodiimide **2c** in the presence of 5 mol%  $[\text{Rh}(\text{C}_2\text{H}_4)_2\text{Cl}]_2$  and 10 mol% **L4** yielded 48.5 mg of the cycloadduct (73%);  $R_f = 0.49$  (96:4 EtOAc/Et<sub>3</sub>N);  $[\alpha]_D^{20} = -181.1$  ( $c = 1$ ,  $\text{CHCl}_3$ ); HPLC analysis – Chiracel OD-H column 85:15 hexane:iPrOH, 1.0 ml/min, Major: 7.21 minutes, Minor: 5.69 minutes, 230 nm detection light,  $ee = 94\%$ ;  $^1\text{H}$  NMR (400 MHz,  $\text{CDCl}_3$ )  $\delta$  6.93 (m, 1H), 6.85 – 6.81 (m, 2H), 6.71 (d, 1H,  $J = 7.6$  Hz), 5.75 (m, 1H), 3.79 (s, 3H), 3.73 (m, 1H), 3.62 – 3.51 (m, 4H), 2.30 (dd, 1H,  $J = 4.4, 16.4$  Hz), 2.20 – 2.10 (m, 5H), 2.05 (m, 1H), 1.85 (m, 1H), 1.66 – 1.56 (m, 3H), 0.86 (s, 9H), 0.006 (s, 6H);  $^{13}\text{C}$  NMR (100 MHz,  $\text{CDCl}_3$ )  $\delta$  152.6, 152.4, 148.6, 140.4, 124.4, 122.4, 120.7, 114.6, 111.2, 62.6, 56.4, 55.8, 45.4, 34.9, 33.6, 30.5, 26.1, 23.2, 18.5, -5.13; IR

(Thin Film) 2940, 1654, 1579, 1441, 1322, 1252, 1102  $\text{cm}^{-1}$ ; HRMS (ESI)  $m/e$  calcd ( $\text{M}+\text{H}^+$ ) 415.27753, found 415.27832.

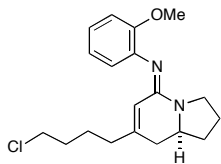

**(S,E)-N-(7-(4-chlorobutyl)-2,3,8,8a-tetrahydroindolizin-5(1H)-ylidene)-2-methoxyaniline (3pc).** General procedure with alkyne **1p** and carbodiimide **2c** in the presence of 5 mol%  $[\text{Rh}(\text{C}_2\text{H}_4)_2\text{Cl}]_2$  and 10 mol% **L4** yielded 32.1 mg of the cycloadduct (60%);  $R_f = 0.46$  (96:4 EtOAc/Et<sub>3</sub>N);  $[\alpha]_D^{20} = -179.6$  ( $c = 1$ ,  $\text{CHCl}_3$ ); HPLC analysis – Chiracel OD-H column 85:15 hexane:iPrOH, 1.0 ml/min, Major: 13.88 minutes, Minor: 11.04 minutes, 230 nm detection light,  $ee = 88\%$ ;  $^1\text{H}$  NMR (400 MHz,  $\text{CDCl}_3$ )  $\delta$  6.95 (m, 1H), 6.86 – 6.83 (m, 2H), 6.73 (d, 1H,  $J = 7.5$  Hz), 5.74 (m, 1H), 3.79 (s, 3H), 3.76 (m, 1H), 3.62 – 3.53 (m, 2H), 3.49 (t, 2H,  $J = 6.4$  Hz), 2.30 (dd, 1H,  $J = 4.5, 16.4$  Hz), 2.20 – 2.05 (m, 5H), 1.86 (m, 1H), 1.74 – 1.52 (m, 5H);  $^{13}\text{C}$  NMR (100 MHz,  $\text{CDCl}_3$ )  $\delta$  152.5, 152.4, 140.0, 124.4, 122.6, 120.7, 115.1, 111.2, 56.4, 55.8, 45.5, 44.8, 36.3, 34.6, 33.6, 32.0, 24.4, 23.2; IR (Thin Film) 2942, 1649, 1581, 1489, 1439, 1328, 1241, 1173, 1118  $\text{cm}^{-1}$ ; HRMS (ESI)  $m/e$  calcd ( $\text{M}+\text{H}^+$ ) 333.17281, found 333.17217.

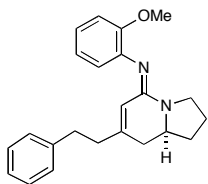

**(S,E)-2-methoxy-N-(7-phenethyl-2,3,8,8a-tetrahydroindolizin-5(1H)-ylidene)aniline (3qc).** General procedure with alkyne **1q** and carbodiimide **2c** in the presence of 5 mol%  $[\text{Rh}(\text{C}_2\text{H}_4)_2\text{Cl}]_2$  and 10 mol% **L4** yielded 39.3 mg of the cycloadduct (70%);  $R_f = 0.47$  (96:4 EtOAc/Et<sub>3</sub>N);  $[\alpha]_D^{20} = -219.8$  ( $c = 1$ ,  $\text{CHCl}_3$ ); HPLC analysis – Chiracel OD-H column 85:15 hexane:iPrOH, 1.0 ml/min, Major: 17.02 minutes, Minor: 12.63 minutes, 230 nm detection light,  $ee = 92\%$ ;  $^1\text{H}$  NMR (400 MHz,  $\text{CDCl}_3$ )  $\delta$  7.28 – 7.24 (m, 2H), 7.18 (m, 1H), 7.10 (d, 2H,  $J = 7.9$  Hz), 6.93 (m, 1H), 6.84 – 6.78 (m, 2H), 6.58 (d, 1H,  $J = 7.7$  Hz), 5.75 (m, 1H), 3.78 (s, 3H), 3.74 (m, 1H), 3.61 – 3.52 (m, 2H), 2.72 – 2.61 (m, 2H), 2.42 – 2.38 (m, 2H), 2.31 (dd, 1H,  $J = 4.5, 16.4$  Hz), 2.22 – 2.14 (m, 2H), 2.04 (m, 1H), 1.85 (m, 1H), 1.60 (m, 1H);  $^{13}\text{C}$  NMR (100 MHz,  $\text{CDCl}_3$ )  $\delta$  152.5, 152.4, 147.7, 141.2, 140.2, 128.6, 128.5, 126.3, 124.4, 122.4, 120.6, 115.2, 111.2, 56.3, 55.8, 45.4, 39.0, 35.0, 33.8, 33.6, 23.2; IR (Thin Film) 2930, 1649, 1581, 1489, 1439, 1328, 1247, 1118  $\text{cm}^{-1}$ ; HRMS (ESI)  $m/e$  calcd ( $\text{M}+\text{H}^+$ ) 342.21179, found 342.21059.

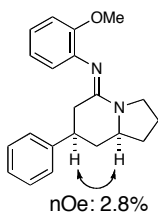

**(E)-2-methoxy-N-((7R,8aS)-7-phenylhexahydroindolizin-5(1H)-ylidene)aniline (11).** A mixture of **3ac** (29.1 mg, 0.0914 mmol) and 34 mg of 10% Pd/C in 3 ml of MeOH was stirred at ambient temperature under hydrogen atmosphere (1 atm) for 3 hours. The reaction mixture was filtered through celite and concentrated *in vacuo*. Upon purification by column chromatography 27.0 mg (92%) of the desired product was isolated;  $R_f = 0.44$  (96:4 EtOAc/Et<sub>3</sub>N);  $[\alpha]_D^{20} = -155.0$  ( $c = 1$ ,  $\text{CHCl}_3$ );  $^1\text{H}$  NMR (400 MHz,  $\text{CDCl}_3$ )  $\delta$  7.28 – 7.24 (m, 2H), 7.19 – 7.12 (m, 3H), 6.87 (ddd, 1H,  $J = 1.7, 7.7, 7.7$  Hz), 6.82 – 6.74 (m, 3H), 3.79 (s, 3H), 3.74 – 3.66 (m, 2H), 3.54 (dddd, 1H,  $J = 4.1, 4.1, 10.9, 10.9$  Hz), 2.94 (dddd, 1H,  $J = 3.3, 5.3, 12.2, 17.7$  Hz), 2.55 (dd, 1H,  $J = 5.3, 16.8$  Hz), 2.27 – 2.20 (m, 2H), 2.12 (m, 1H), 2.05 (m, 1H), 1.87 (m, 1H), 1.66 – 1.55 (m, 2H);  $^{13}\text{C}$  NMR (100 MHz,  $\text{CDCl}_3$ )  $\delta$  155.9, 151.6, 145.0, 140.5, 128.8, 126.9, 126.8, 124.1, 122.4, 121.1, 111.5, 59.3, 55.8, 46.4, 39.9, 36.8, 34.3, 33.7, 22.8; IR (Thin Film) 2932,

1602, 1584, 1462, 1443, 1320, 1242, 1110  $\text{cm}^{-1}$ ; HRMS (ESI)  $m/e$  calcd ( $\text{M}+\text{H}^+$ ) 321.19614, found 321.19721.

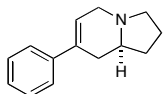

**(S)-7-phenyl-1,2,3,5,8,8a-hexahydroindolizine (12).** To a solution of **3ac** (33.0 mg, 0.104 mmol) in 2 ml of anhydrous THF was added 0.5 ml of 1M DIBAL solution (in hexane) at 0 °C. The reaction mixture was stirred at ambient temperature until the disappearance of starting material. The reaction was quenched with  $\text{H}_2\text{O}$  and then 2N NaOH, and extracted with EtOAc. The combined organic layers were washed with brine, dried over  $\text{MgSO}_4$ , and concentrated *in vacuo*. Upon purification by column chromatography 15.0 mg (72%) of the desired product was isolated;  $R_f = 0.36$  (96:4 EtOAc/ $\text{Et}_3\text{N}$ );  $[\alpha]_D^{20} = +85.3$  ( $c = 1$ ,  $\text{CHCl}_3$ );  $^1\text{H NMR}$  (400 MHz,  $\text{CDCl}_3$ )  $\delta$  7.39 (d, 2H,  $J = 7.6$  Hz), 7.32 (t, 2H,  $J = 7.6$  Hz), 7.23 (t, 1H,  $J = 7.2$  Hz), 6.08 (m, 1H), 3.69 (dm, 1H,  $J = 16.4$  Hz), 3.25 (ddd, 1H,  $J = 2.0, 8.8, 8.8$  Hz), 2.93 (dm, 1H,  $J = 16.4$  Hz), 2.67 (ddd, 1H,  $J = 2.8, 2.8, 16.0$  Hz), 2.40 (m, 1H), 2.30 (m, 1H), 2.20 (q, 1H, 8.9 Hz), 2.07 (m, 1H), 1.92 (m, 1H), 1.80 (m, 1H), 1.56 (m, 1H);  $^{13}\text{C NMR}$  (100 MHz,  $\text{CDCl}_3$ )  $\delta$  141.6, 135.9, 128.5, 127.1, 125.4, 122.6, 60.4, 54.5, 53.1, 35.0, 31.1, 21.7; IR (Thin Film) 2960, 2910, 2779, 1496, 1446, 1384, 1328, 1147  $\text{cm}^{-1}$ ; HRMS (ESI)  $m/e$  calcd ( $\text{M}+\text{H}^+$ ) 200.14337, found 200.14313.

$^1\text{H NMR}$  and  $^{13}\text{C NMR}$  spectra of new compounds are attached:

X-ray data of **3bc** is attached following the spectra

### L3

STANDARD 1H OBSERVE

yu3-55  
yu3-55

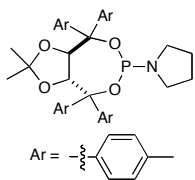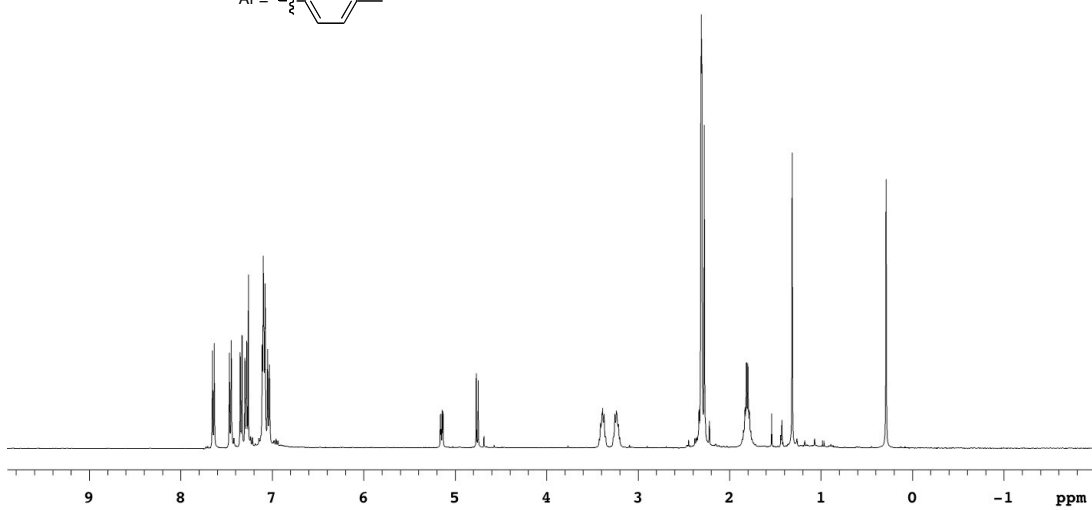

13C OBSERVE

yu3-55  
yu3-55

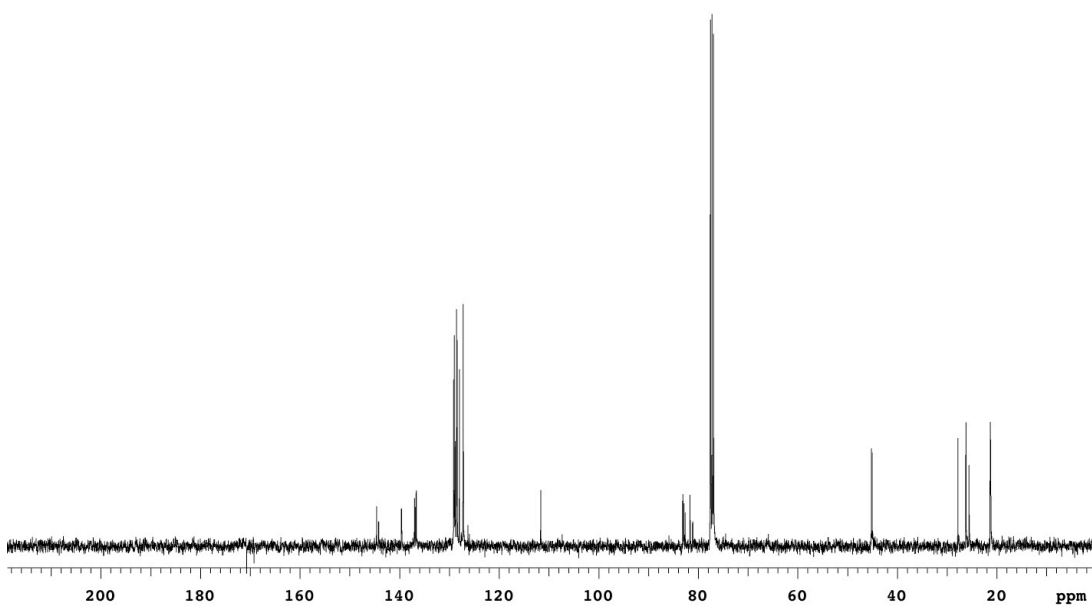

L4

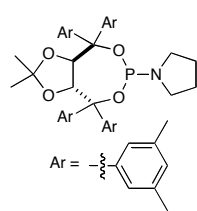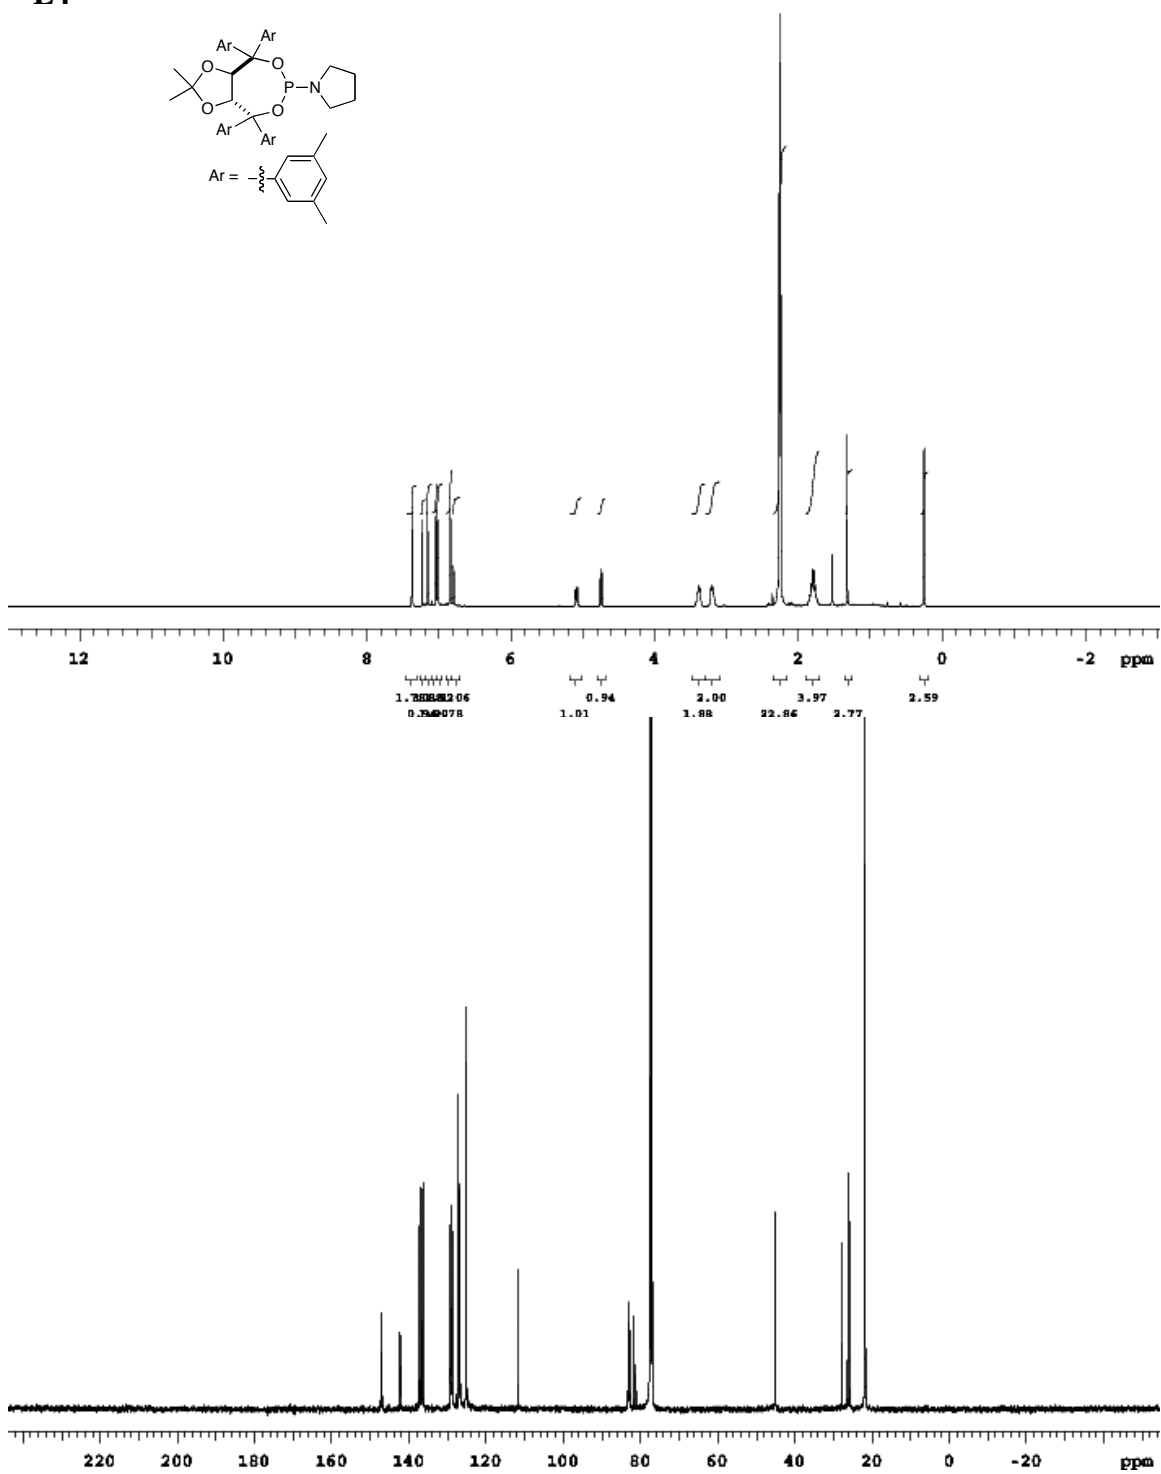

L5

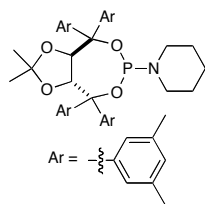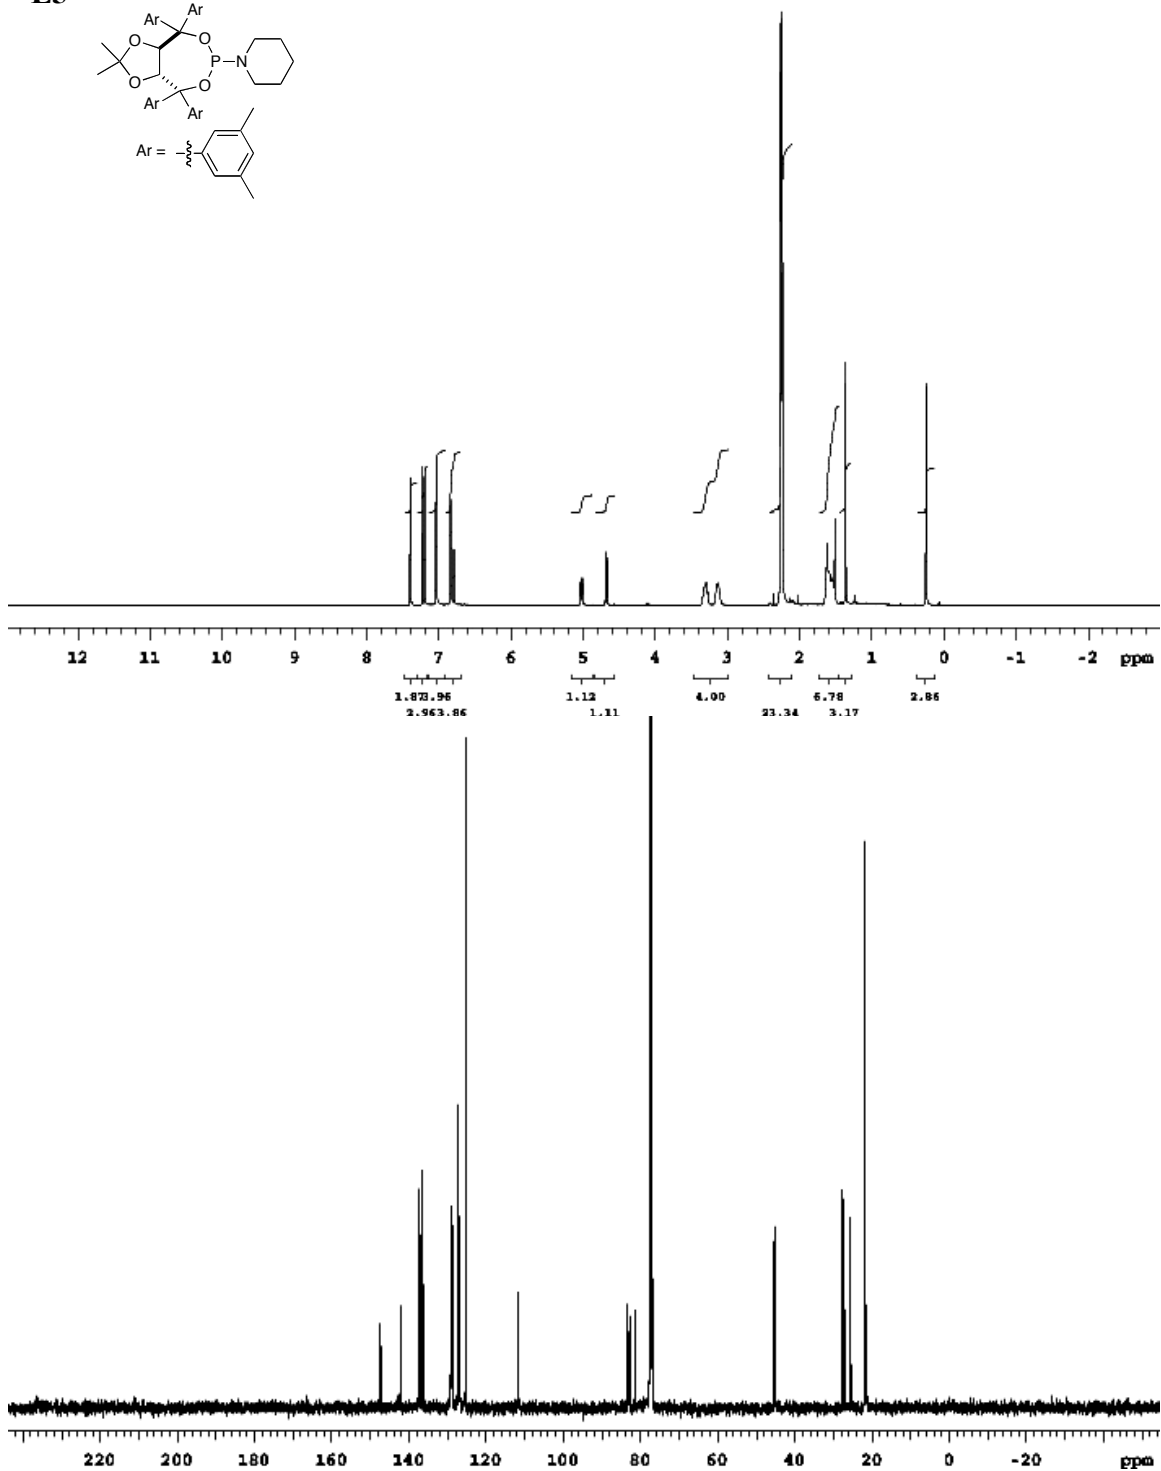

STANDARD 1H OBSERVE

yu3-58

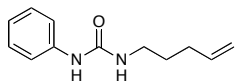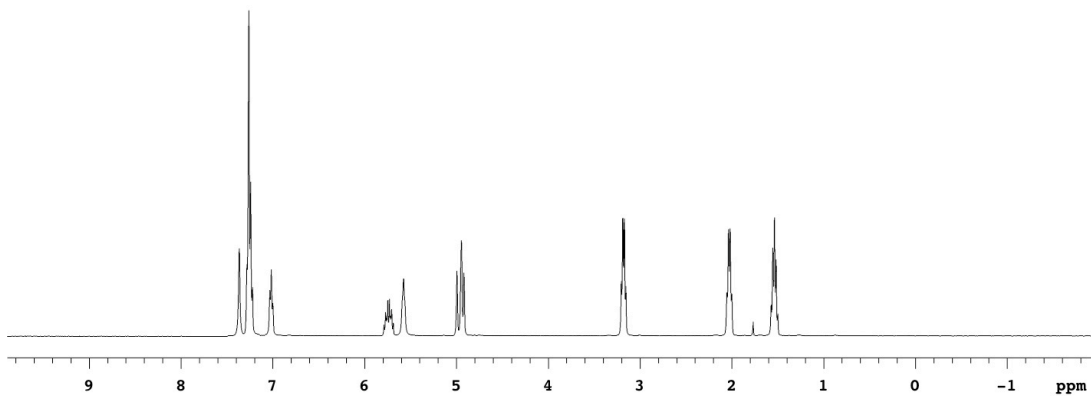

<sup>13</sup>C OBSERVE

yu3-58

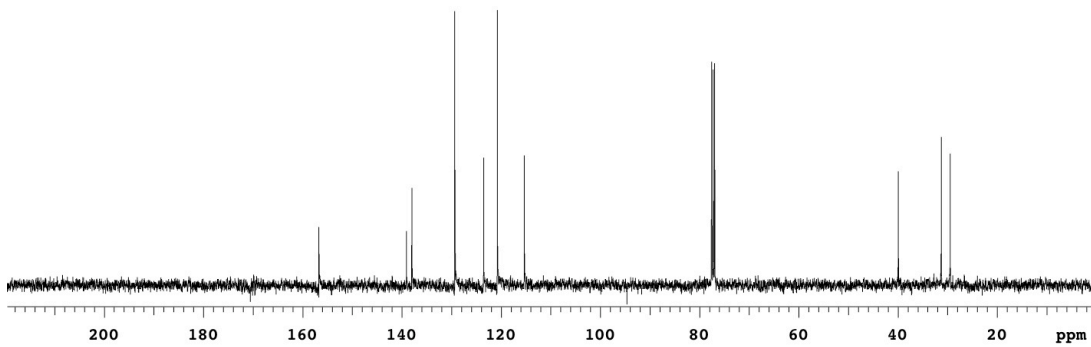

**2a**

STANDARD 1H OBSERVE

yu3-60

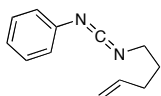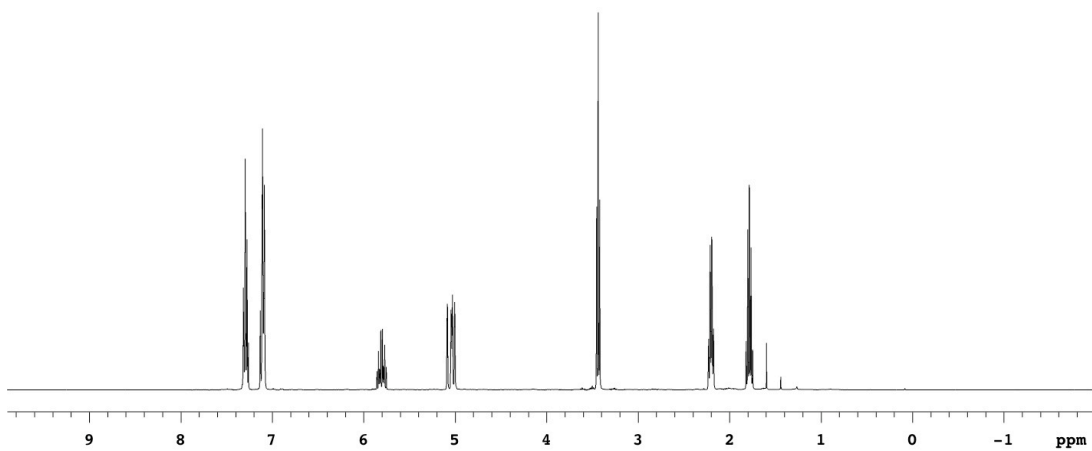

13C OBSERVE

yu3-60  
yu3-60

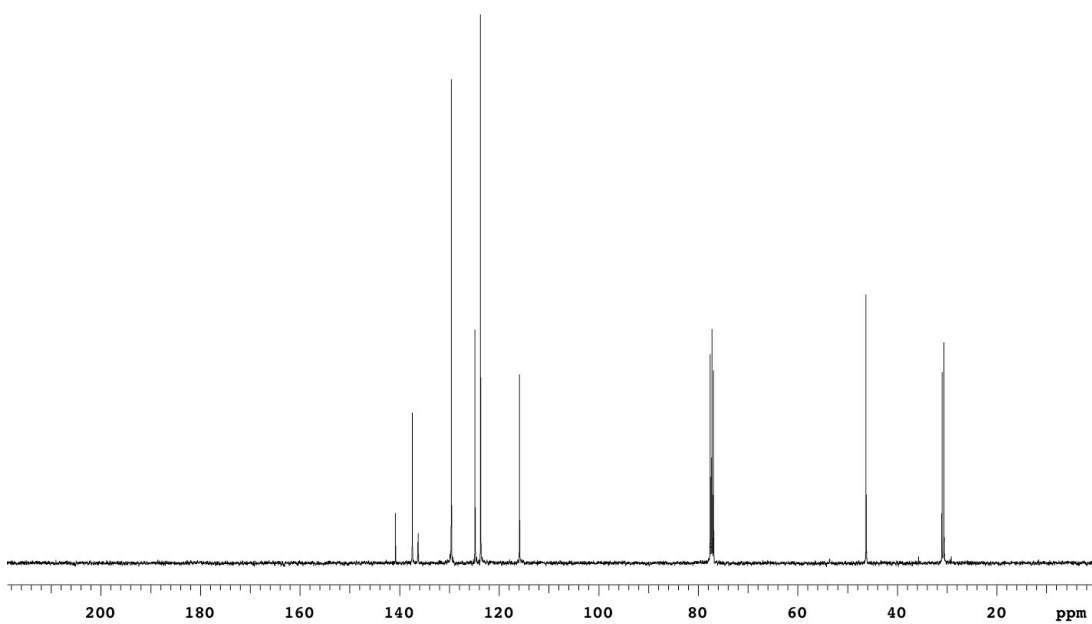



STANDARD 1H OBSERVE

yu3-26

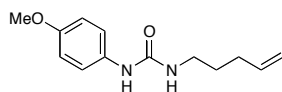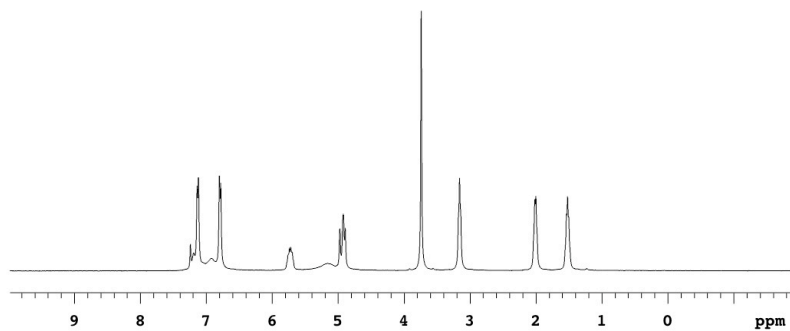

13C OBSERVE

yu3-26

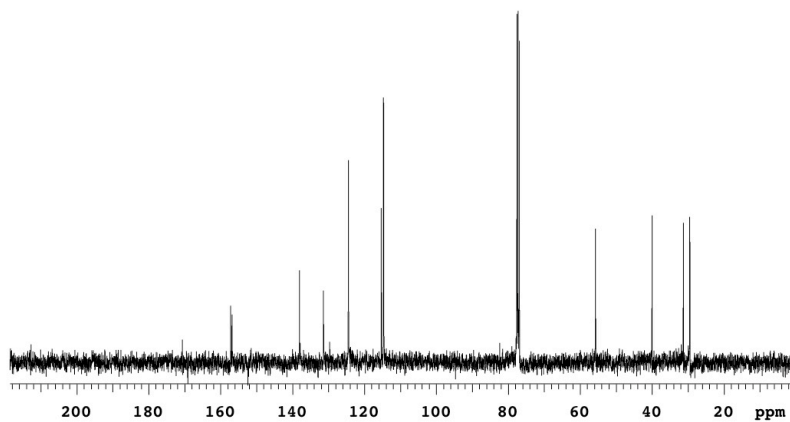

**2b**

STANDARD 1H OBSERVE

yu3-31

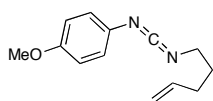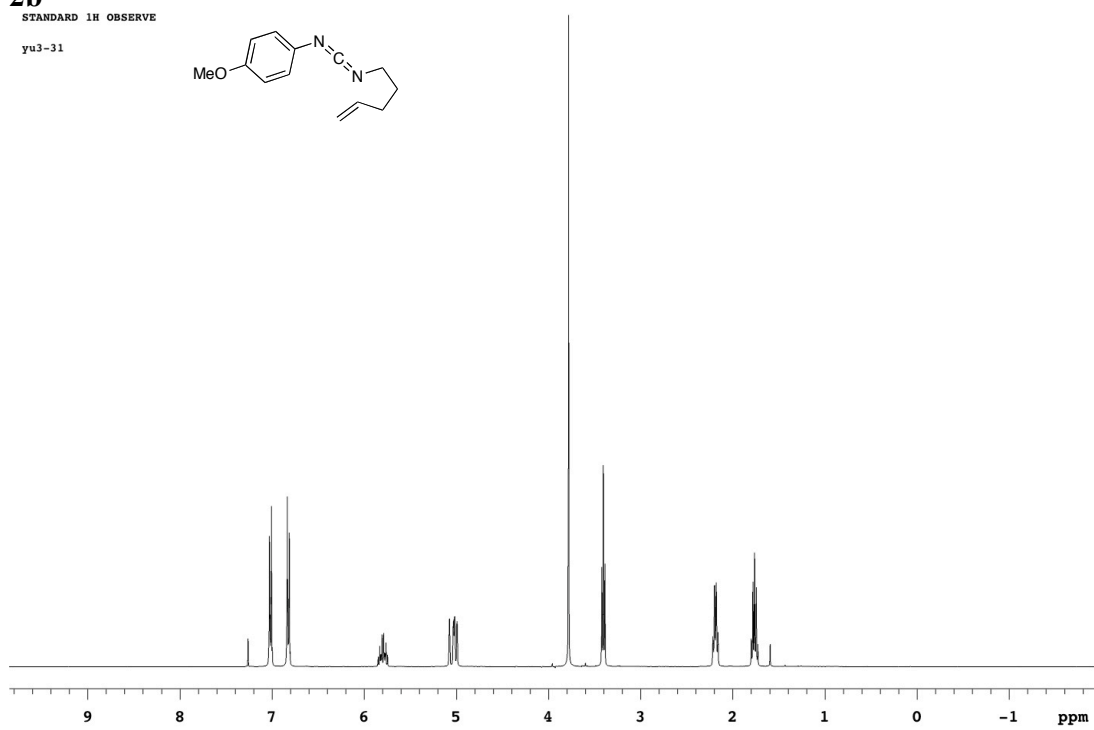

13C OBSERVE

yu3-31

yu3-31

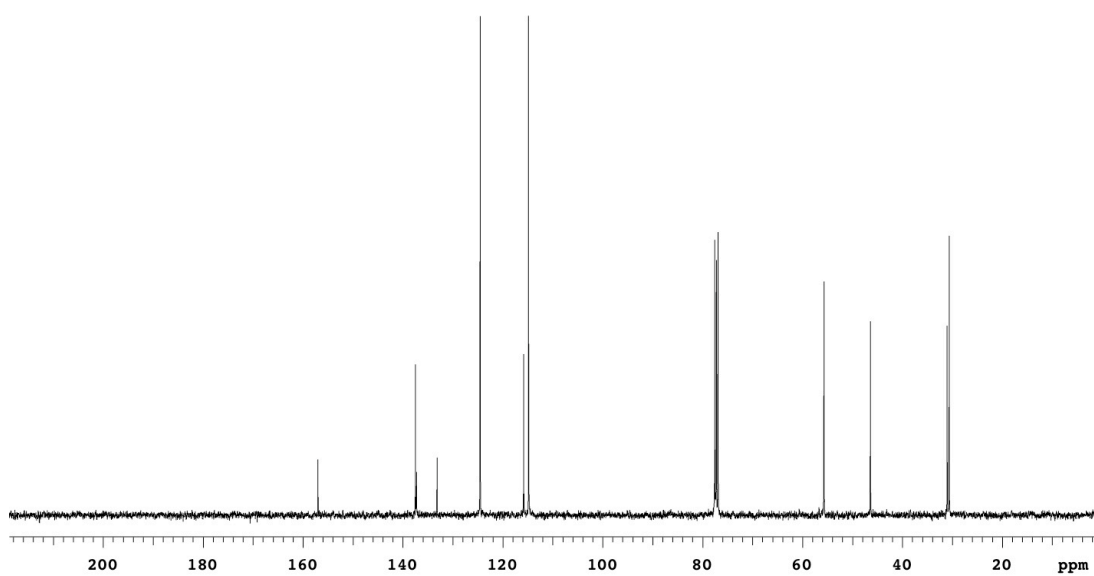

STANDARD 1H OBSERVE

yu3-27

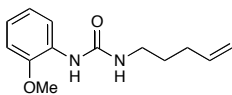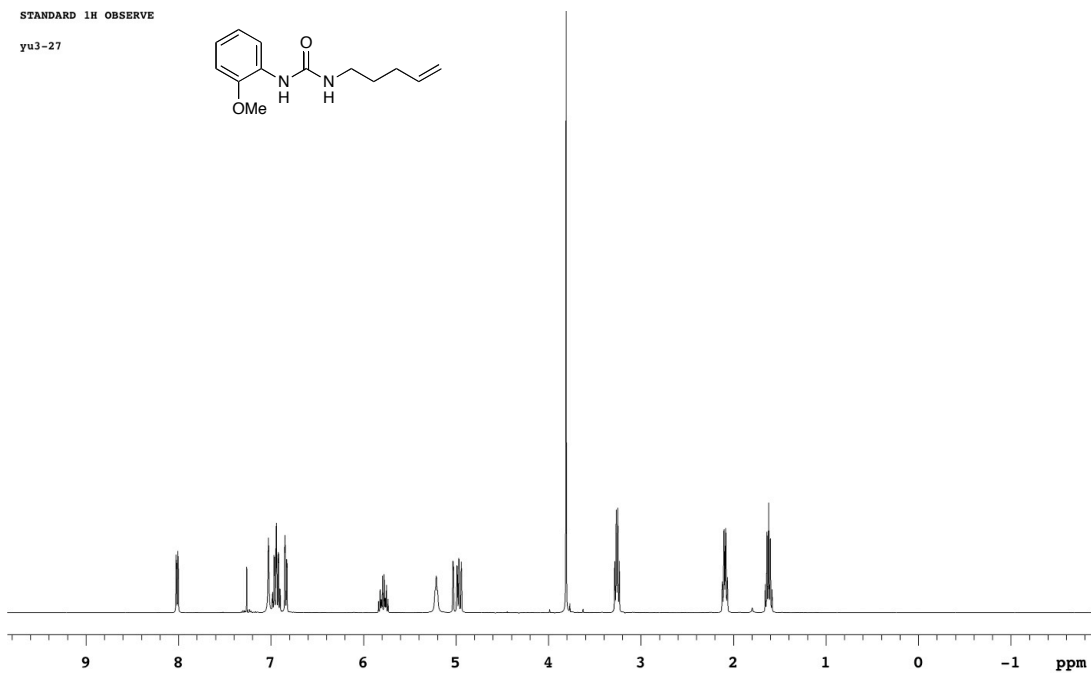

13C OBSERVE

yu3-27

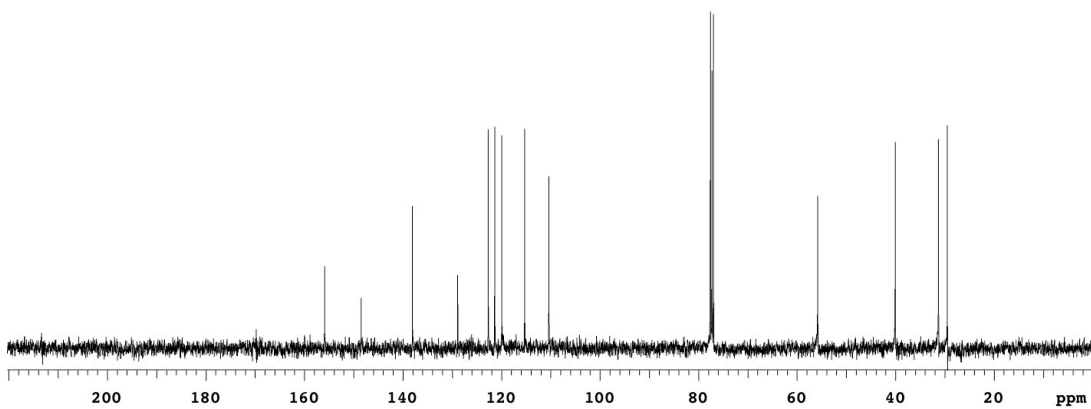

2c

STANDARD 1H OBSERVE

yu3-119

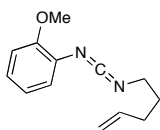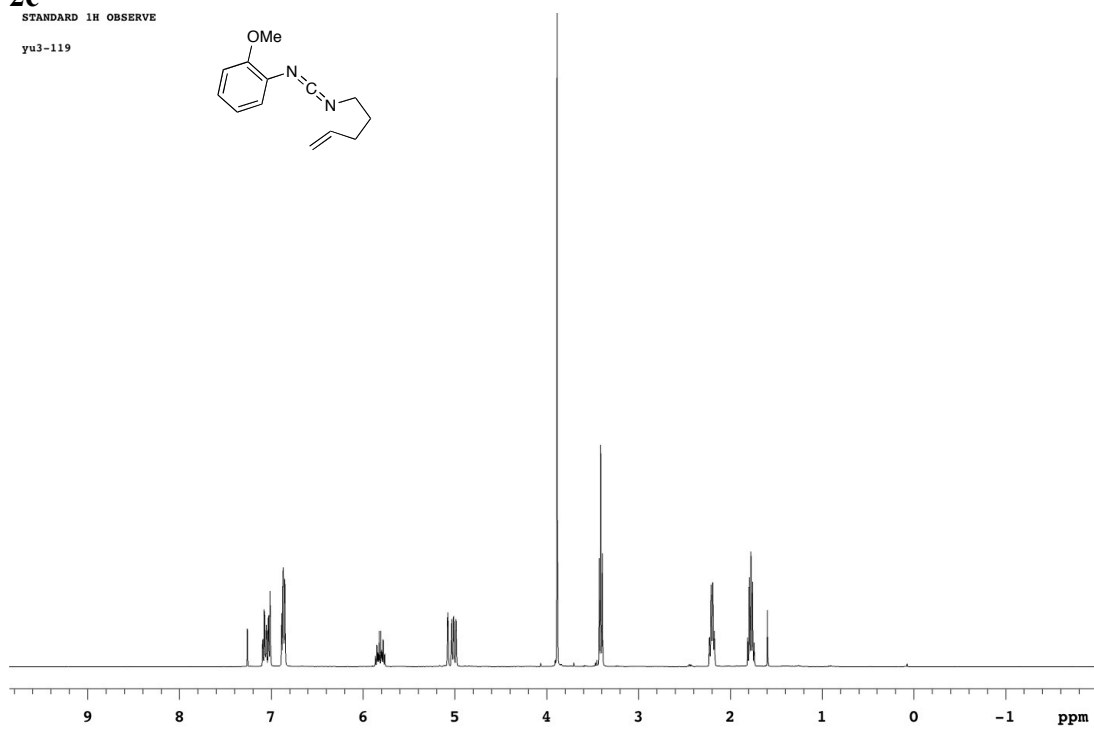

13C OBSERVE

yu3-119

yu3-119

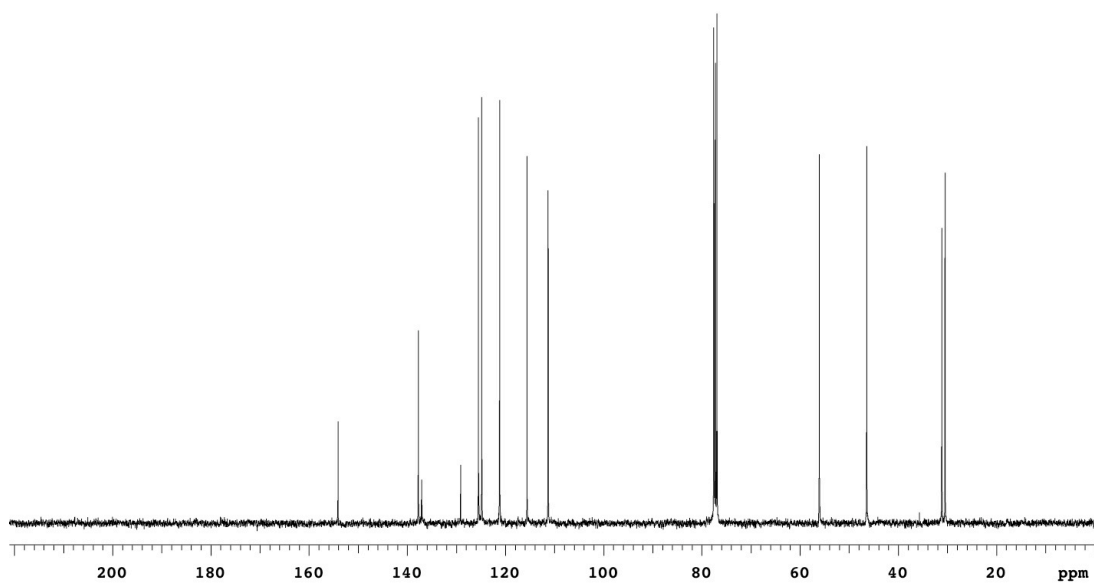

STANDARD 1H OBSERVE

yu3-59  
yu3-59

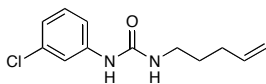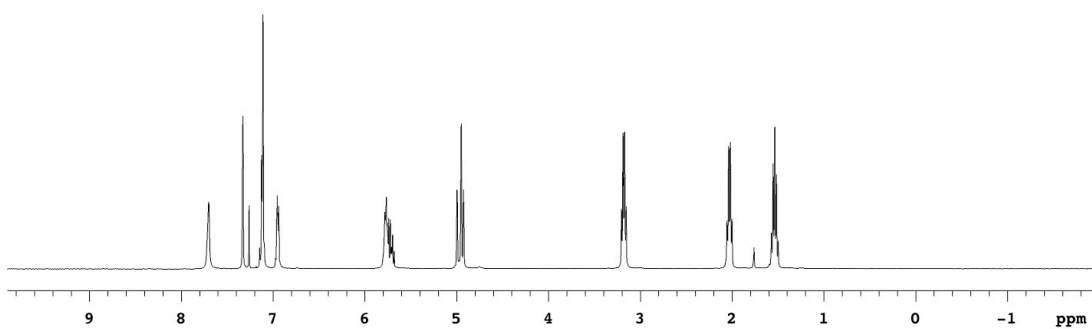

13C OBSERVE

yu3-59  
yu3-59

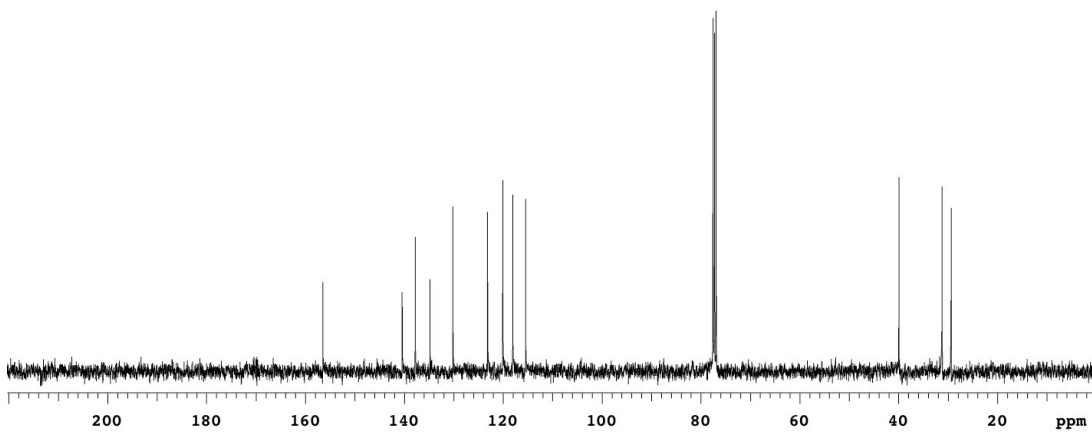

**2d**

STANDARD 1H OBSERVE

yu3-111  
yu3-111

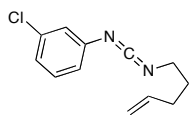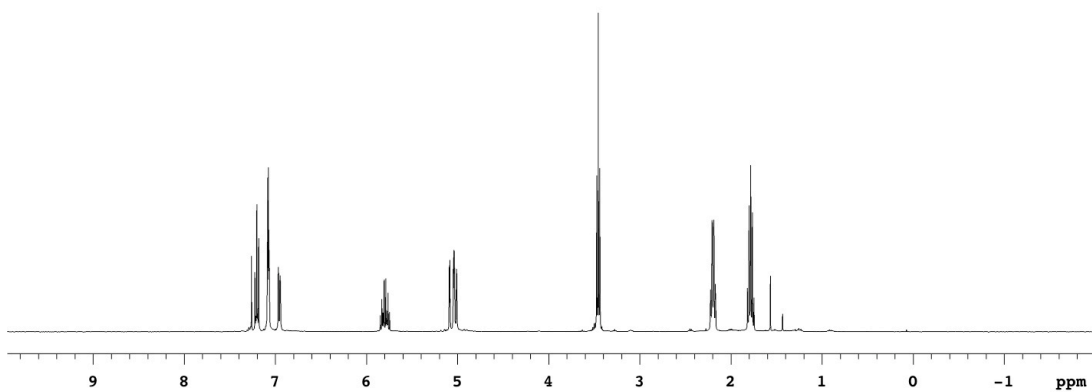

13C OBSERVE

yu3-111  
yu3-111

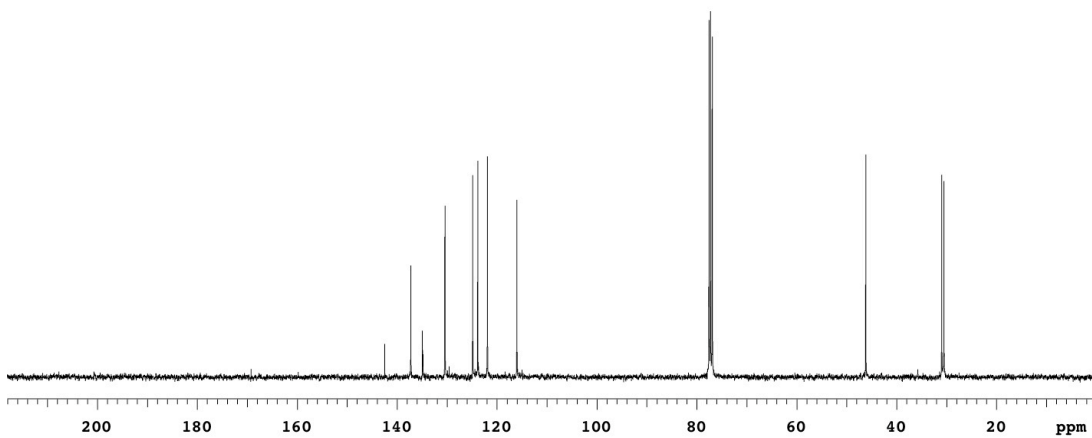

STANDARD 1H OBSERVE

yu3-78

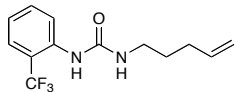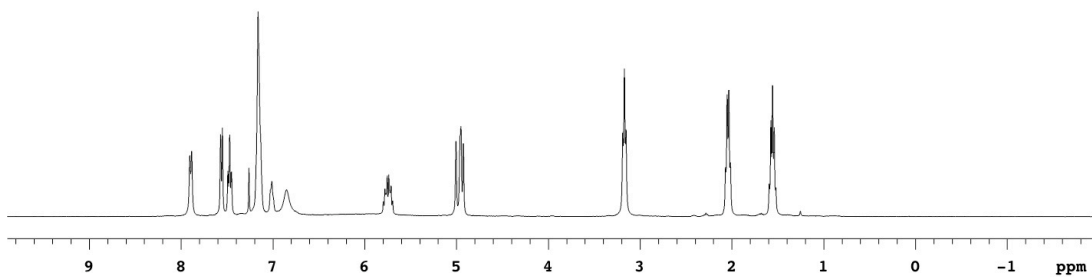

13C OBSERVE

yu3-78

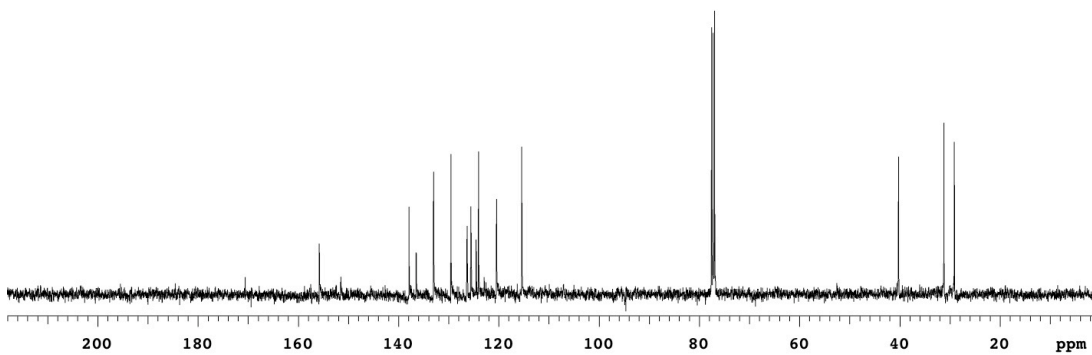

2e

STANDARD 1H OBSERVE

yu3-175  
yu3-175

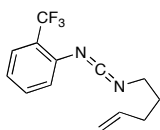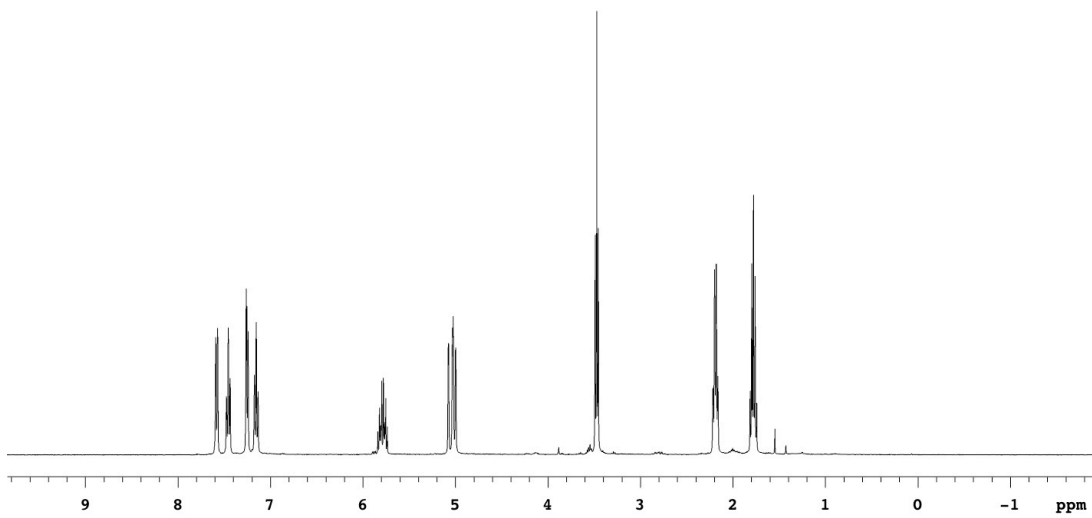

13C OBSERVE

yu3-175

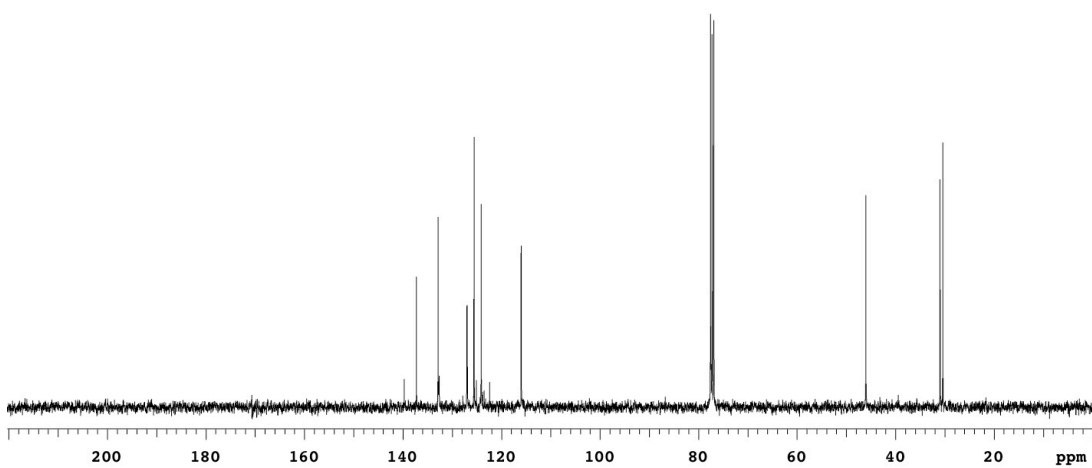



2f

STANDARD 1H OBSERVE

yu3-197  
yu3-197

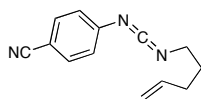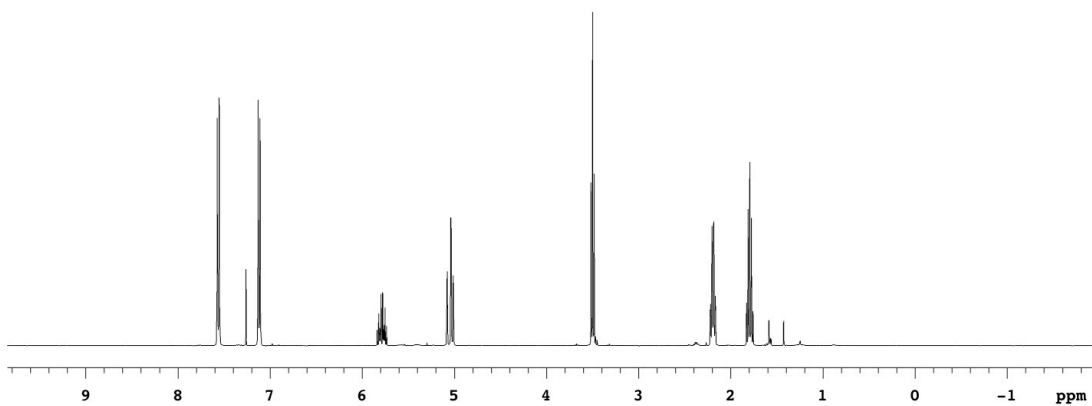

13C OBSERVE

yu3-197  
yu3-197

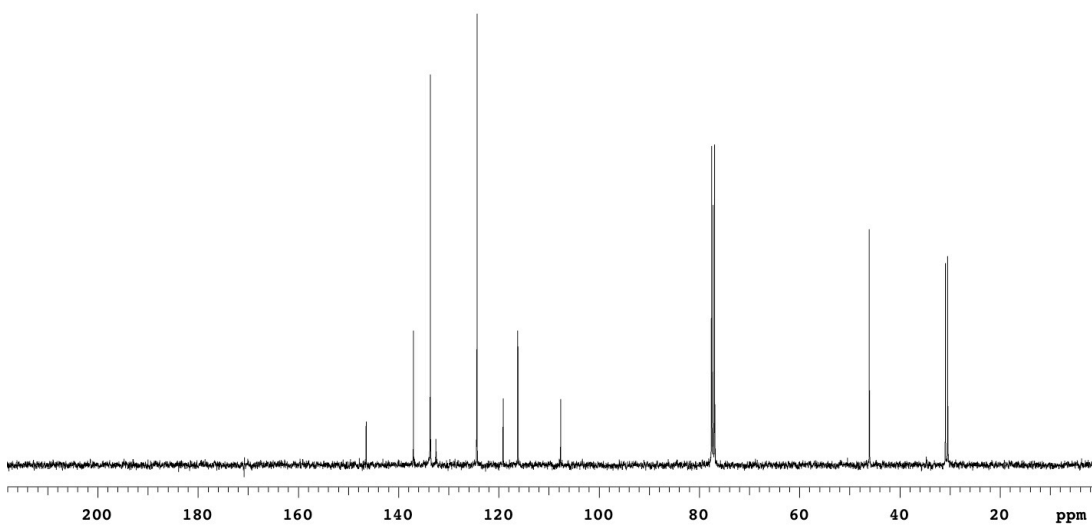

STANDARD 1H OBSERVE

yu3-138  
yu3-138

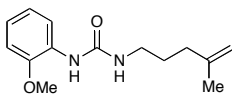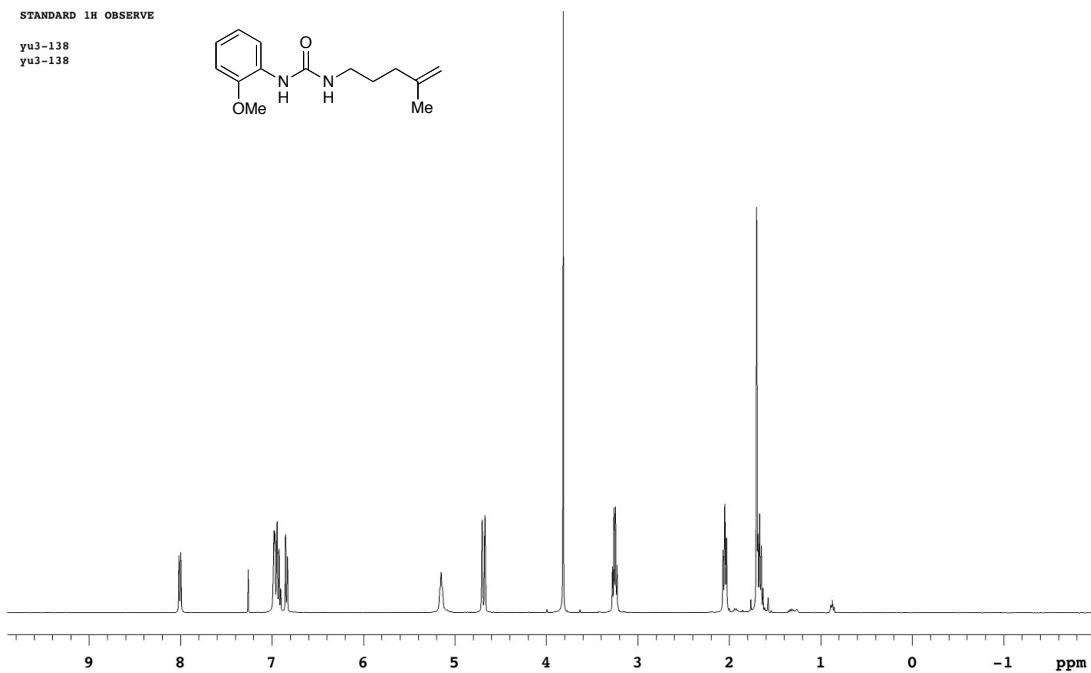

13C OBSERVE

yu3-138  
yu3-138

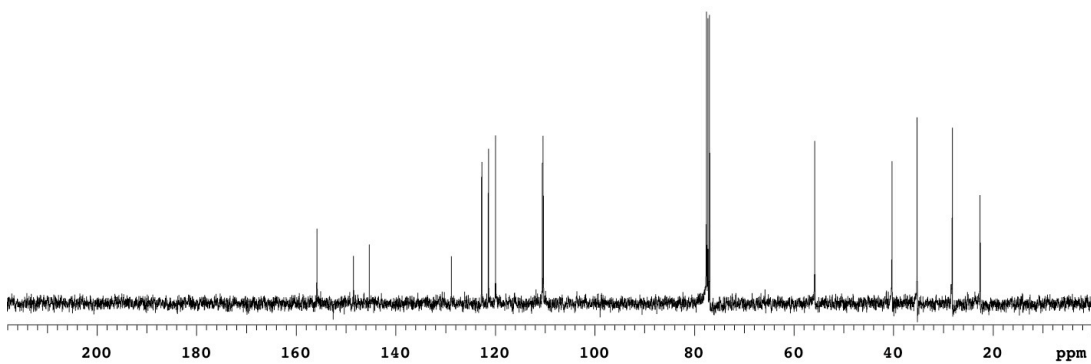

5

STANDARD 1H OBSERVE

yu3-141

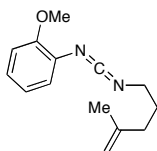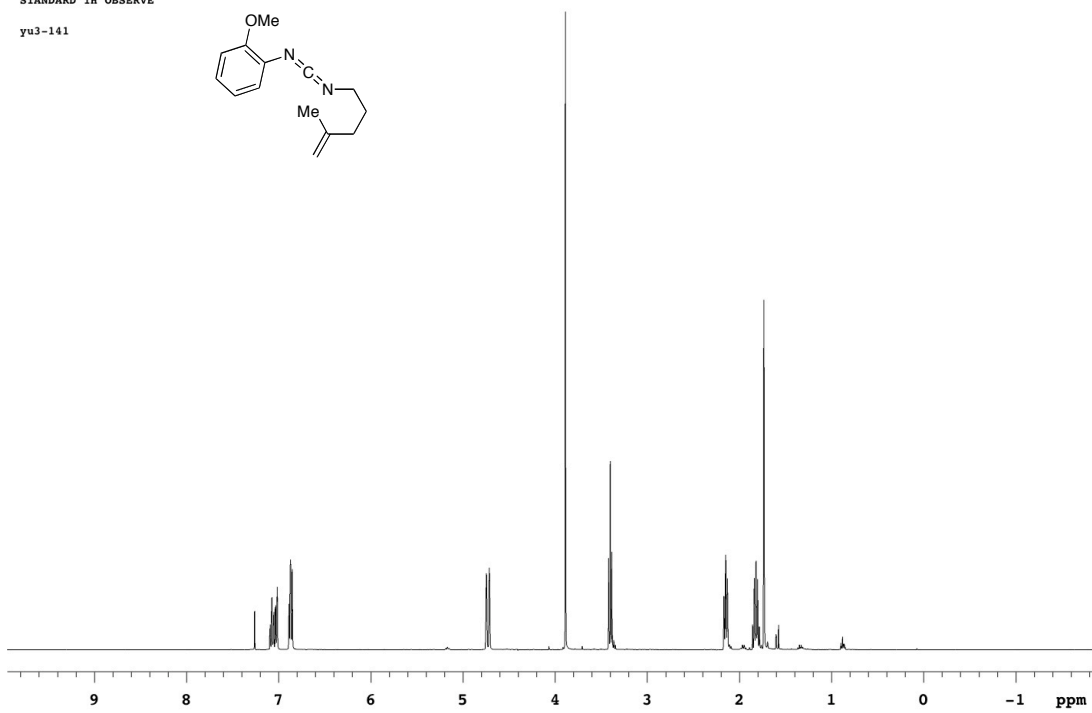

13C OBSERVE

yu3-141

yu3-141

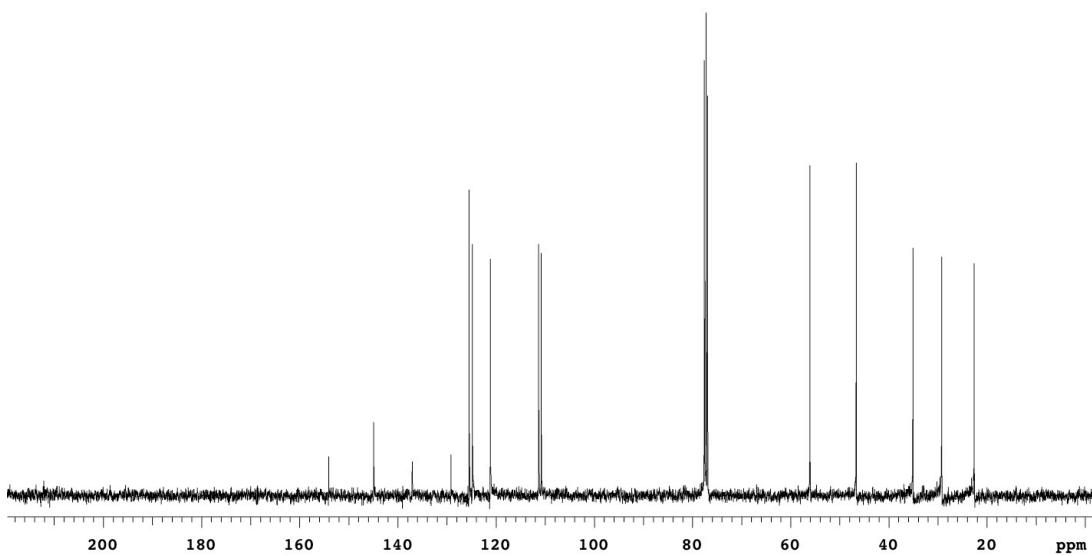

STANDARD 1H OBSERVE

yu3-154  
yu3-154

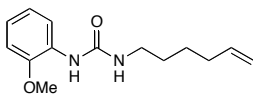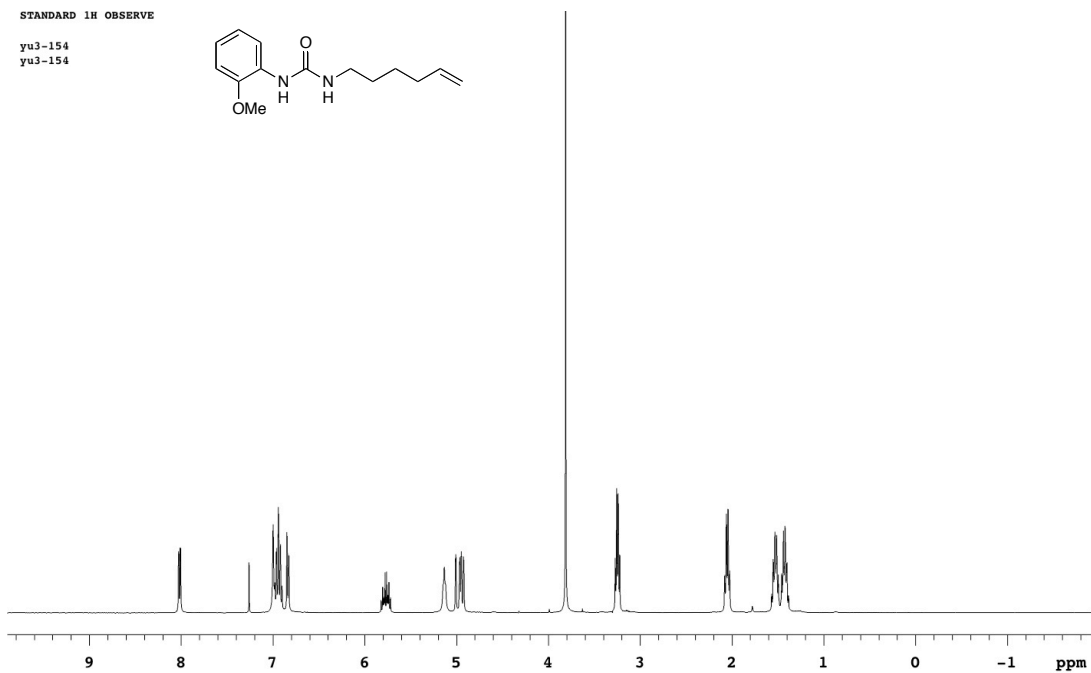

13C OBSERVE

yu3-154  
yu3-154

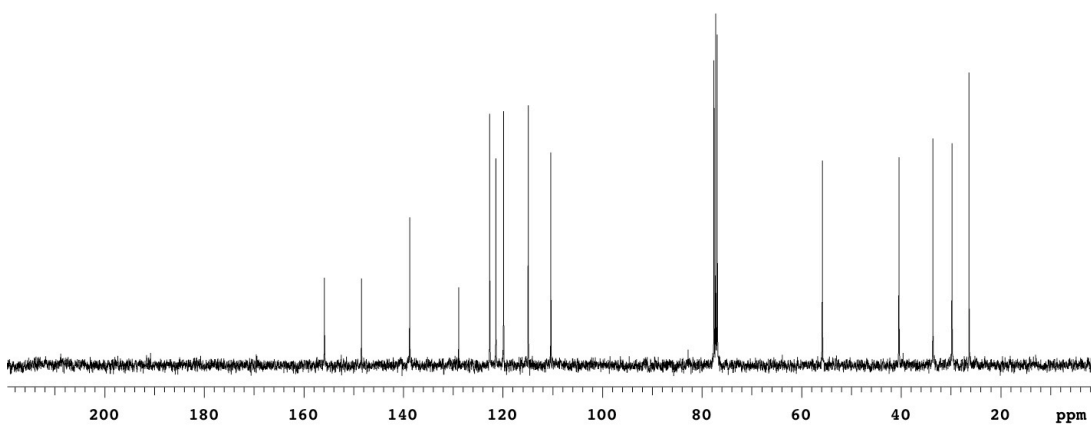

8

STANDARD 1H OBSERVE

yu3-157  
yu3-157

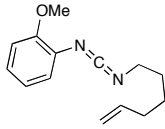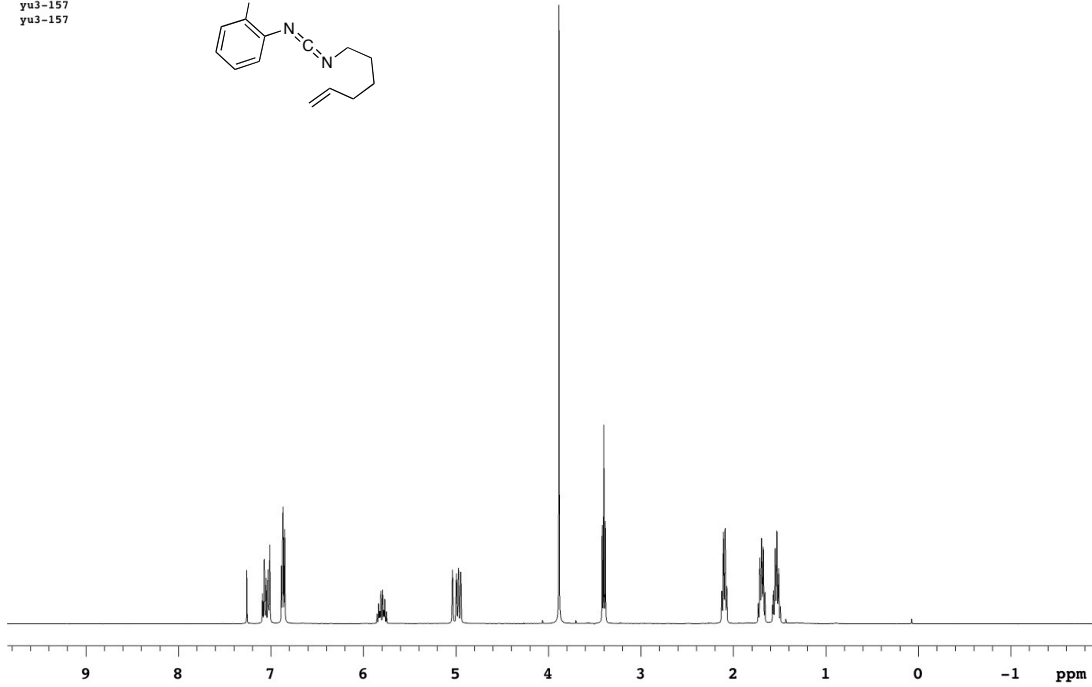

13C OBSERVE

yu3-157  
yu3-157

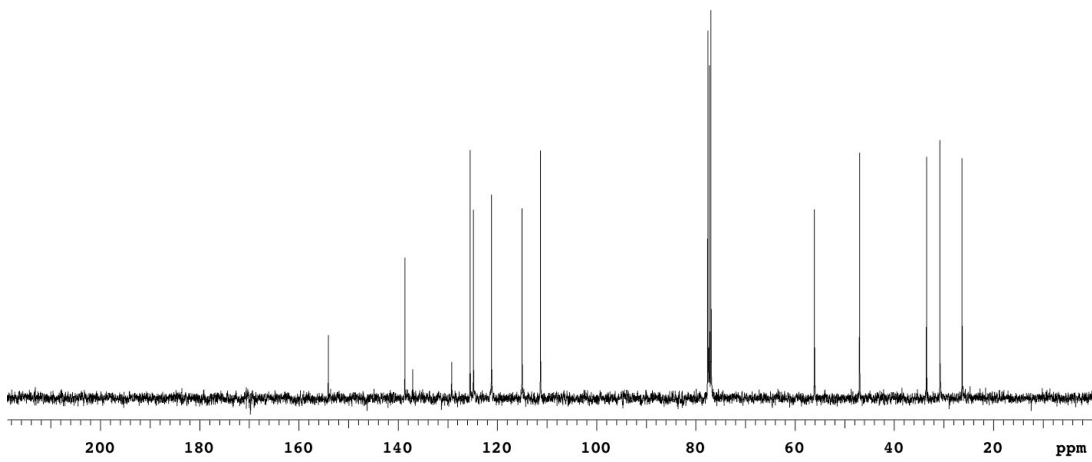

### 3aa

STANDARD 1H OBSERVE

yu3-62-1

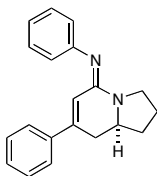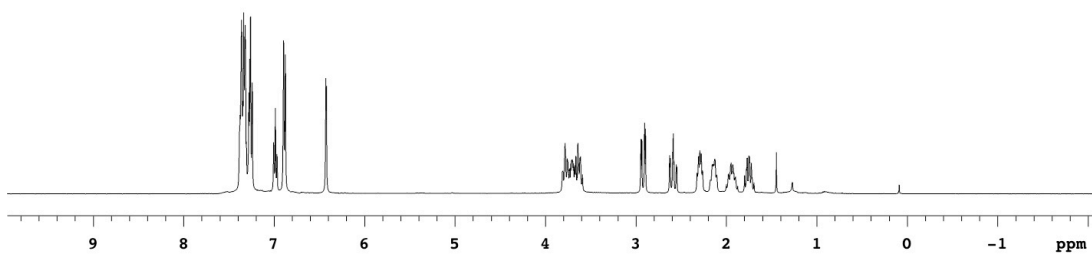

13C OBSERVE

yu3-62-1

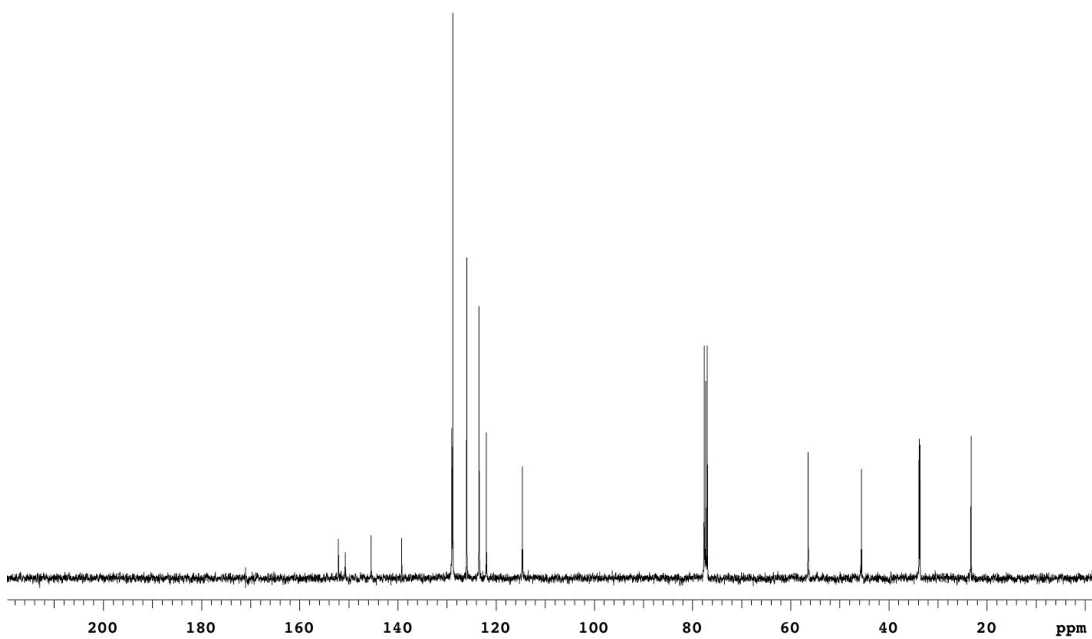

4aa

STANDARD 1H OBSERVE

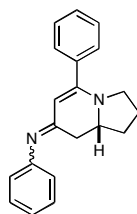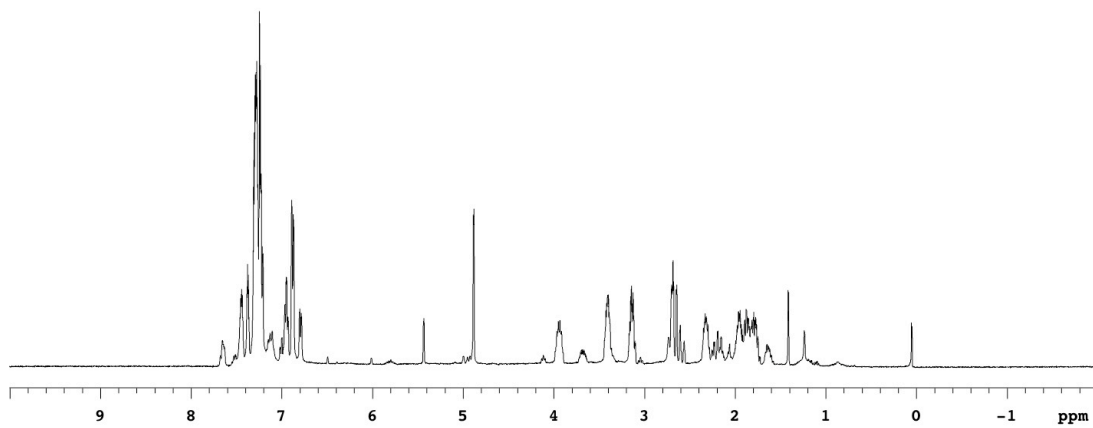

13C OBSERVE

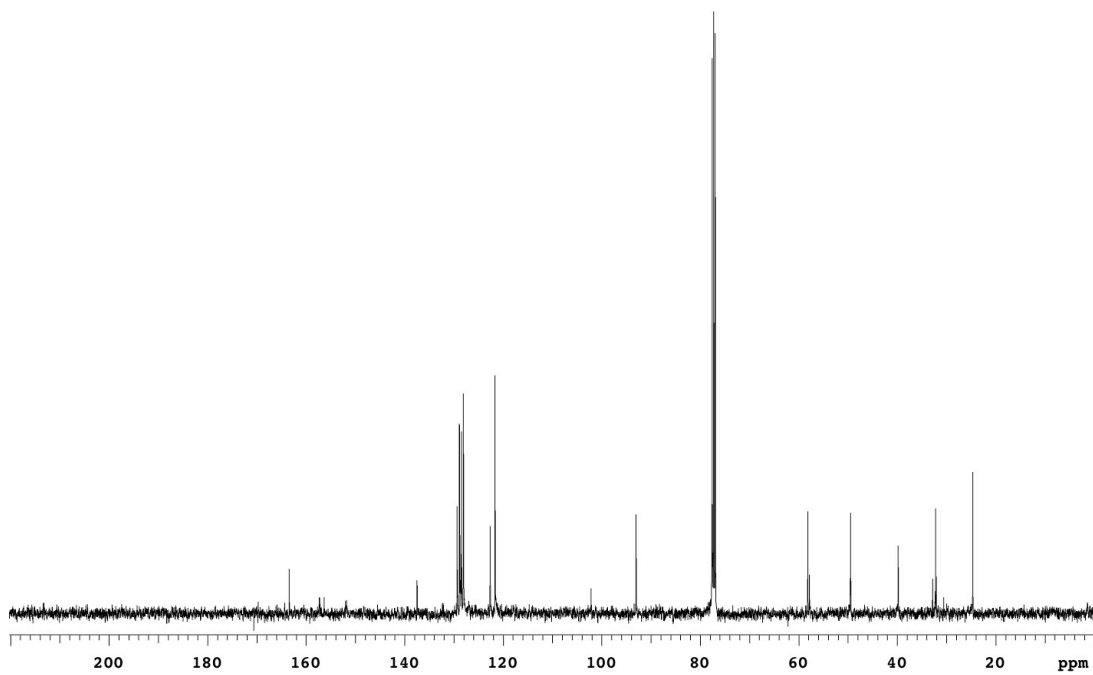

# 3ab

STANDARD 1H OBSERVE

yu3-50-1

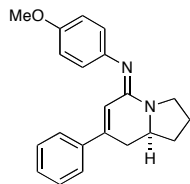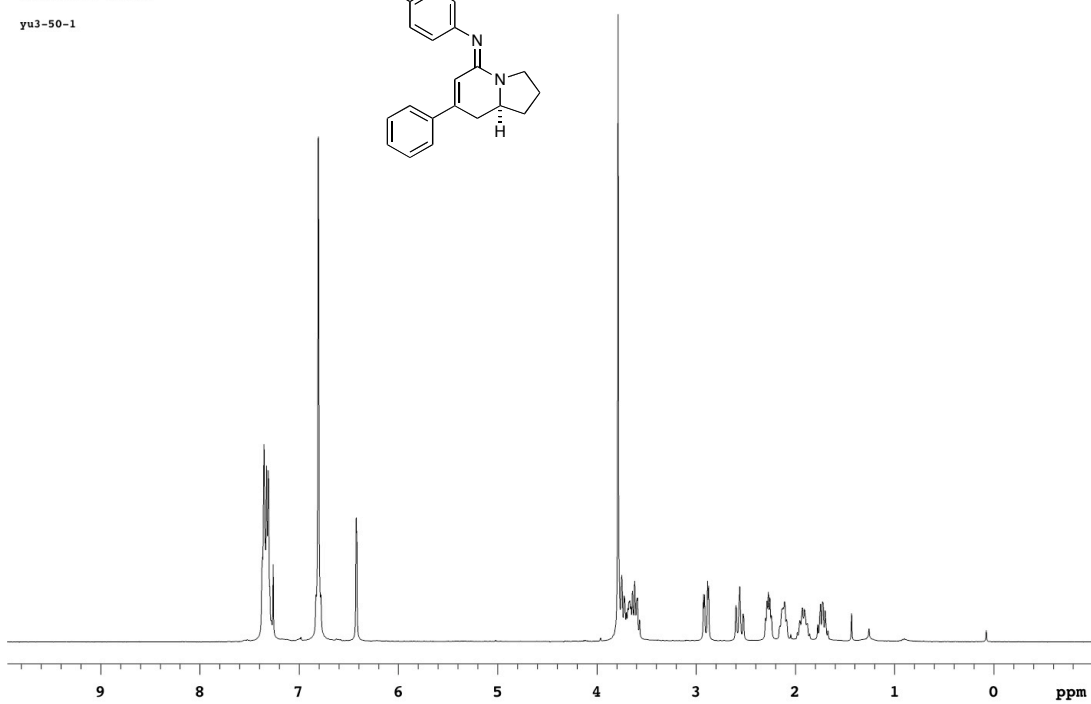

13C OBSERVE

yu3-50-1

yu3-50-1

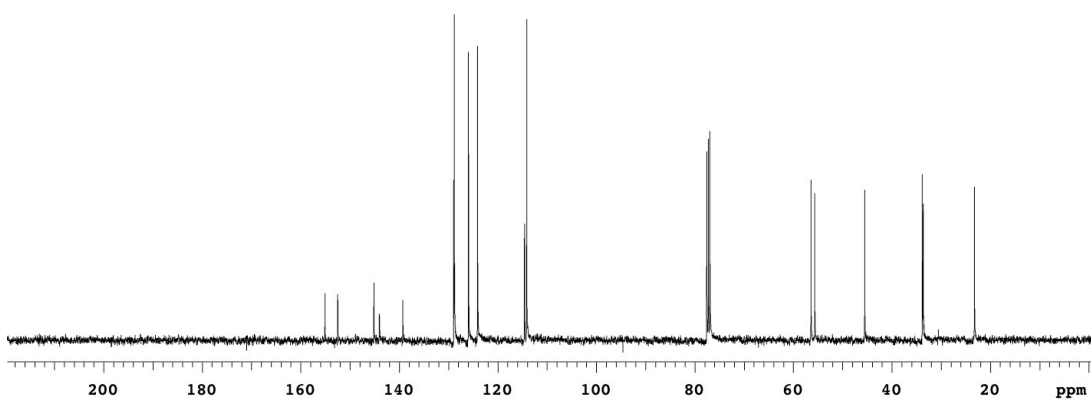



# 4ab

STANDARD 1H OBSERVE

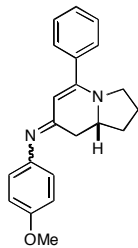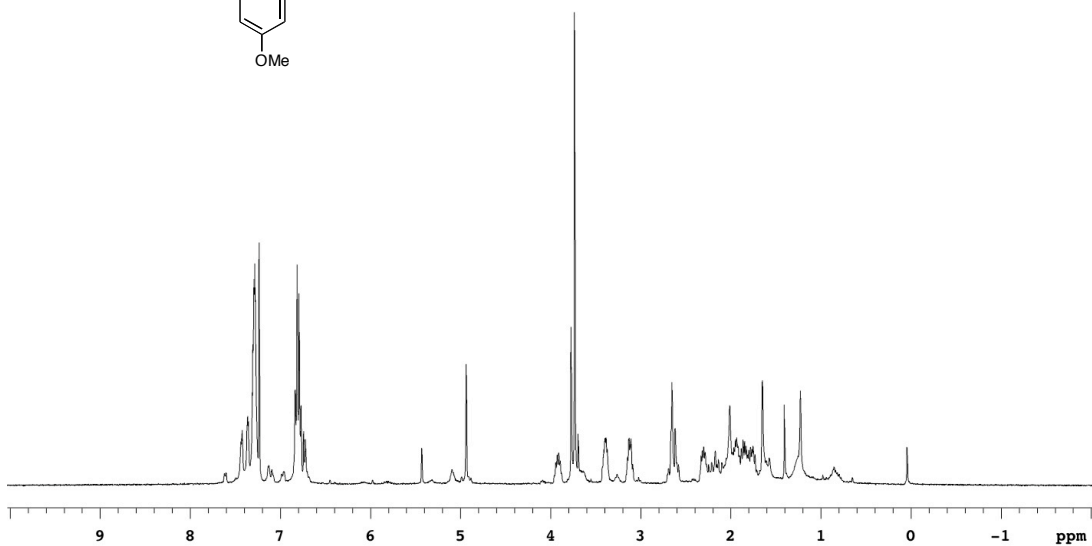

13C OBSERVE

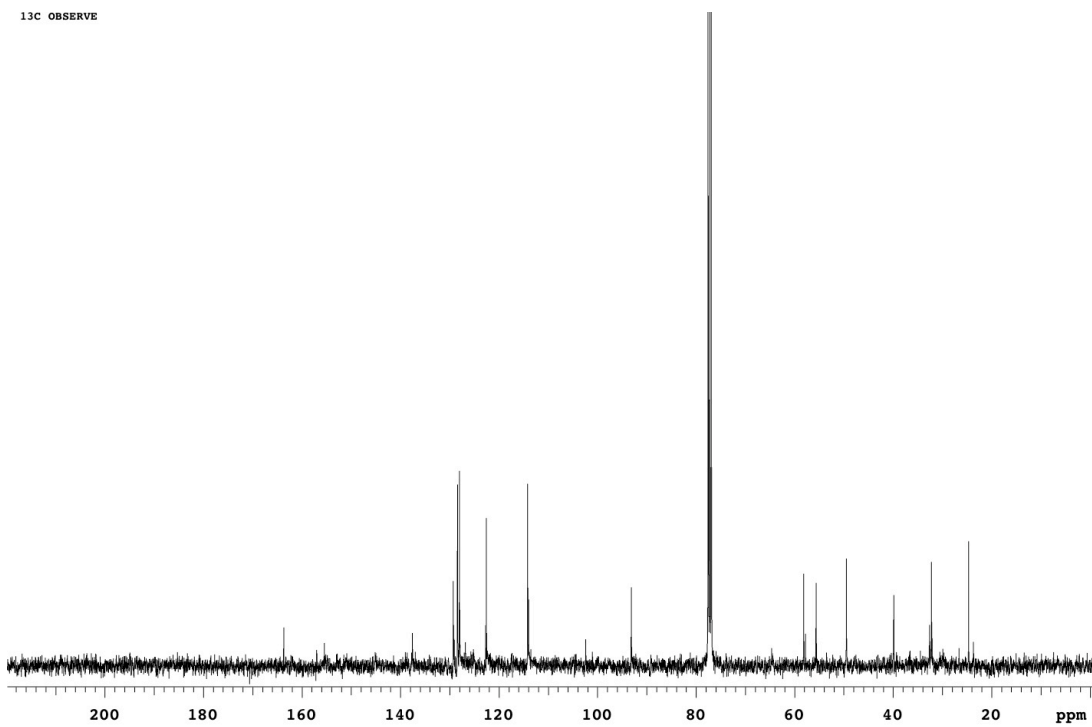

# 3ac

STANDARD 1H OBSERVE

yu3-68-1

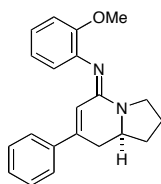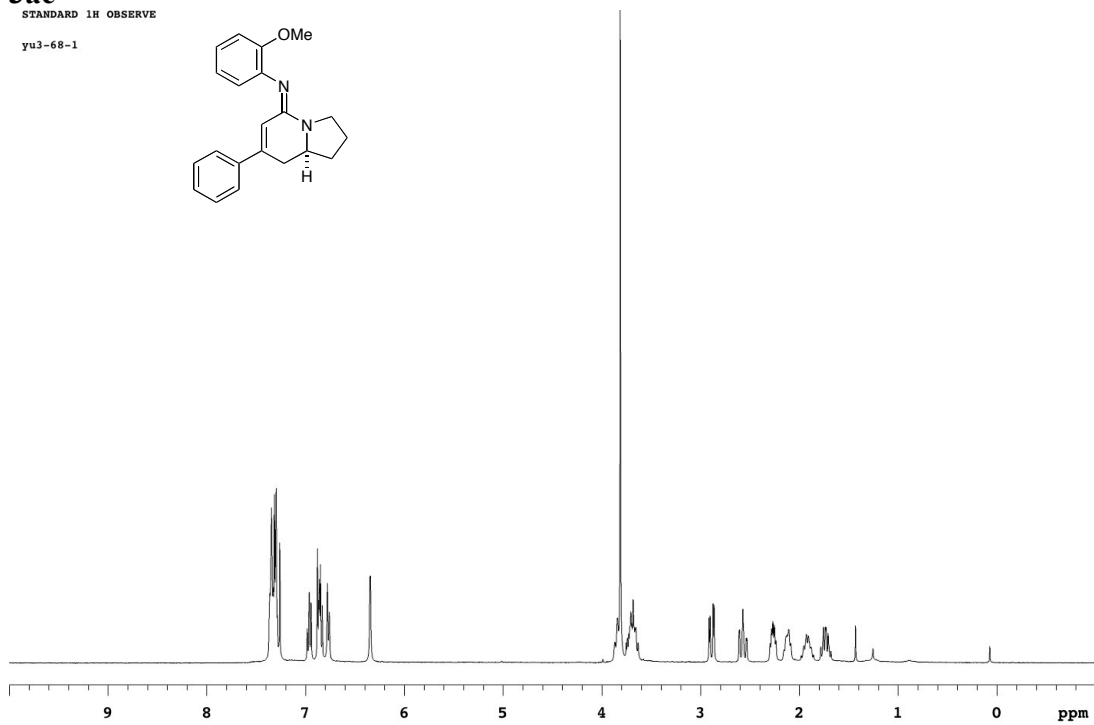

13C OBSERVE

yu3-68-1

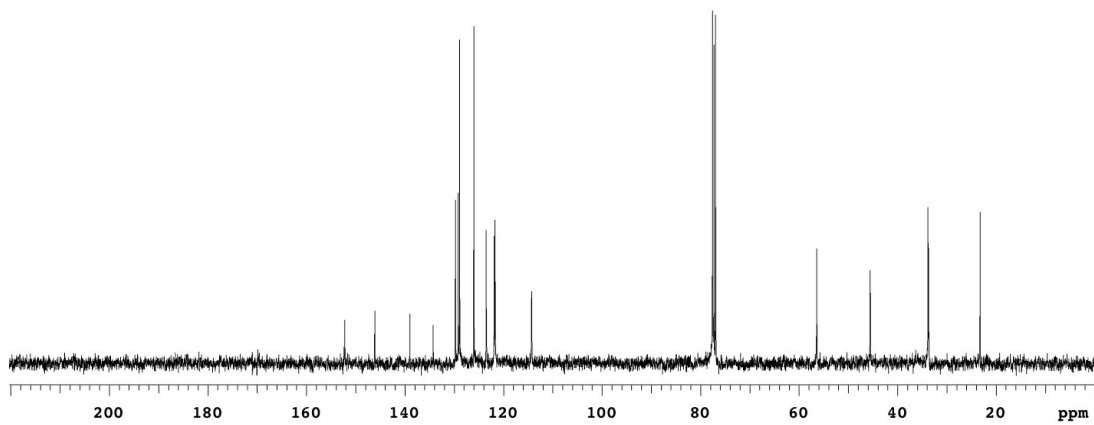

4ac

STANDARD 1H OBSERVE

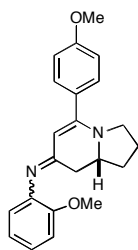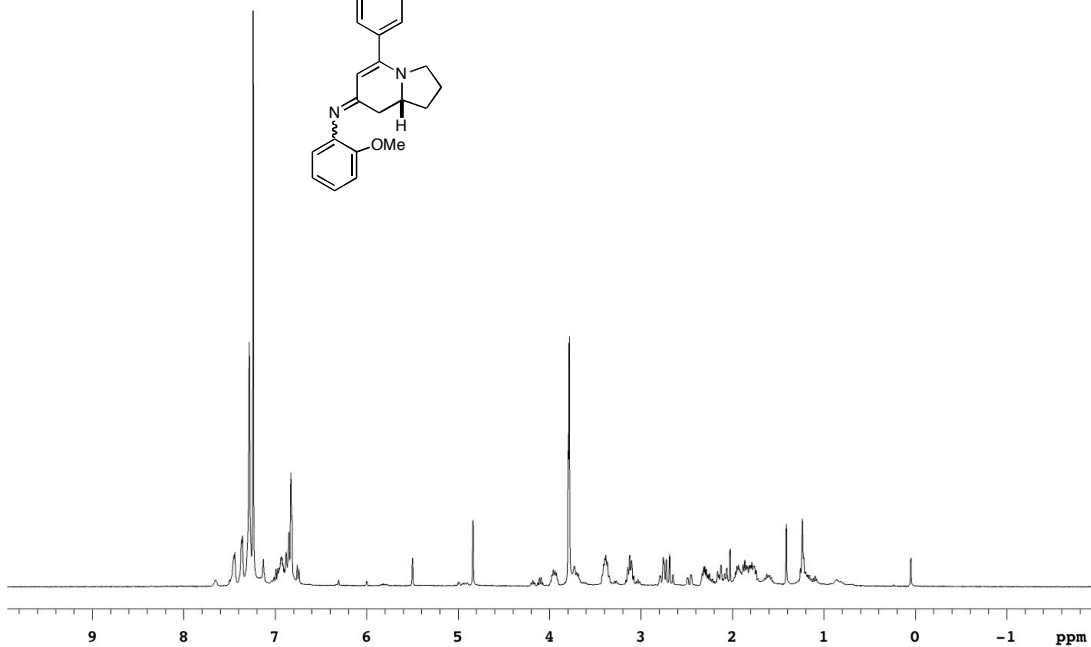

13C OBSERVE

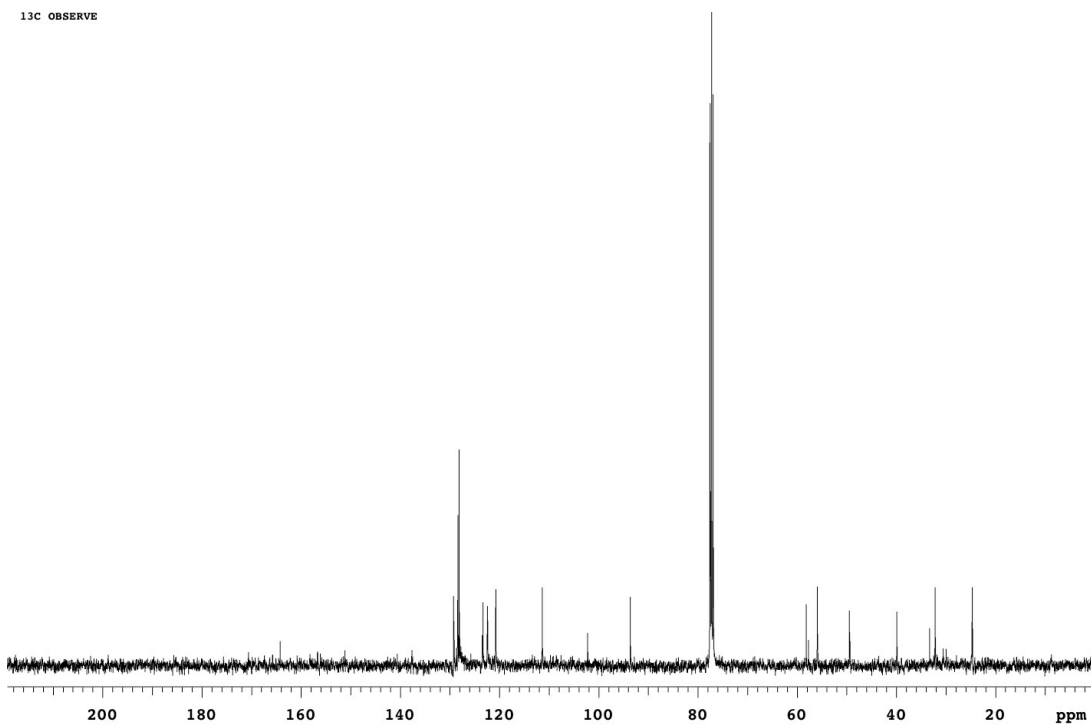

### 3ad

STANDARD 1H OBSERVE

yu3-63-1

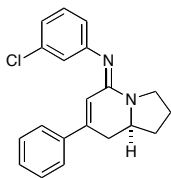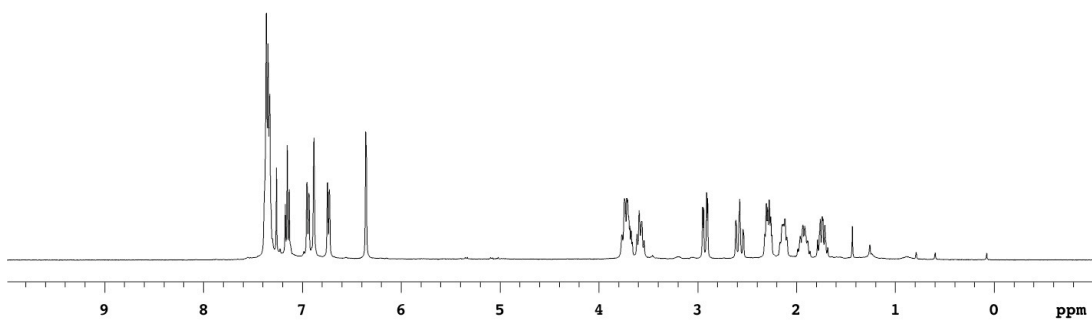

13C OBSERVE

yu3-63-1

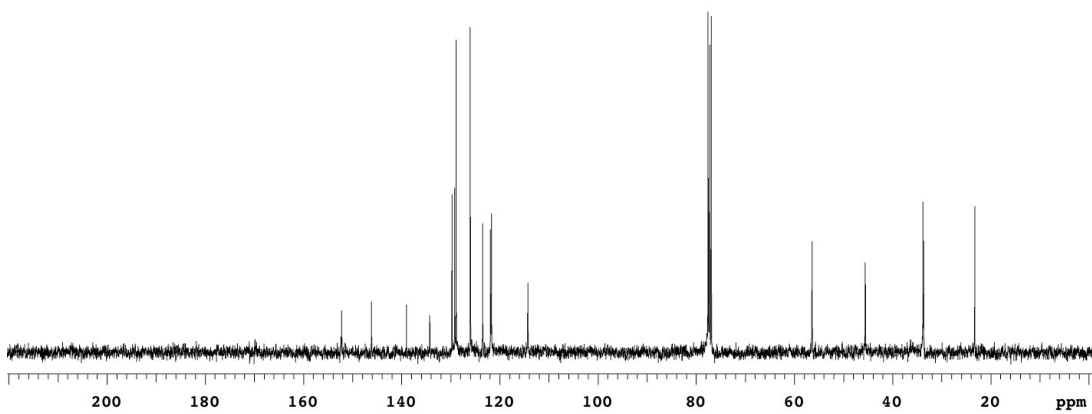

**3ae**

STANDARD 1H OBSERVE

yu3-113-1

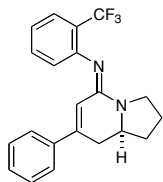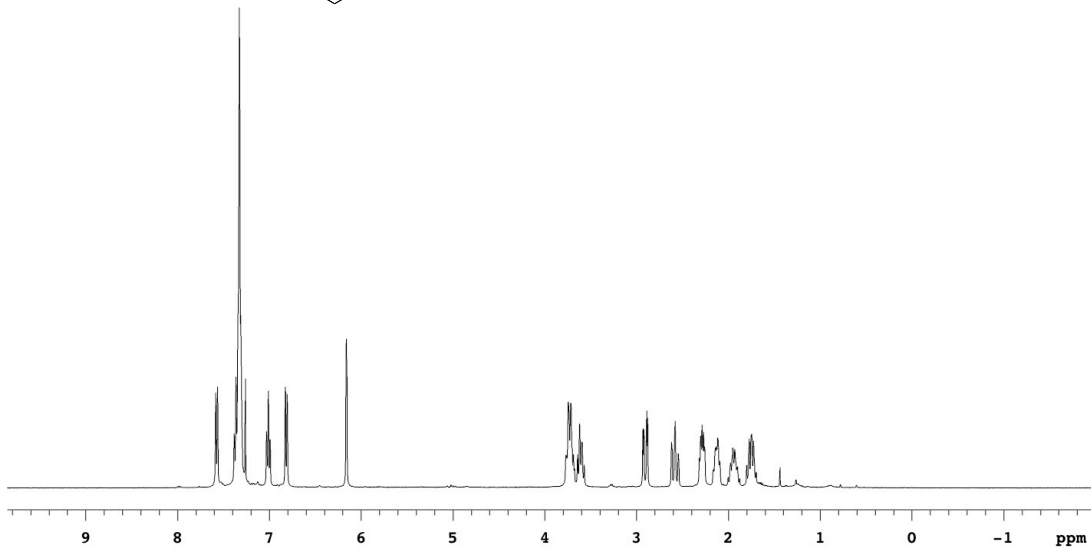

13C OBSERVE

yu3-113

yu3-113-1

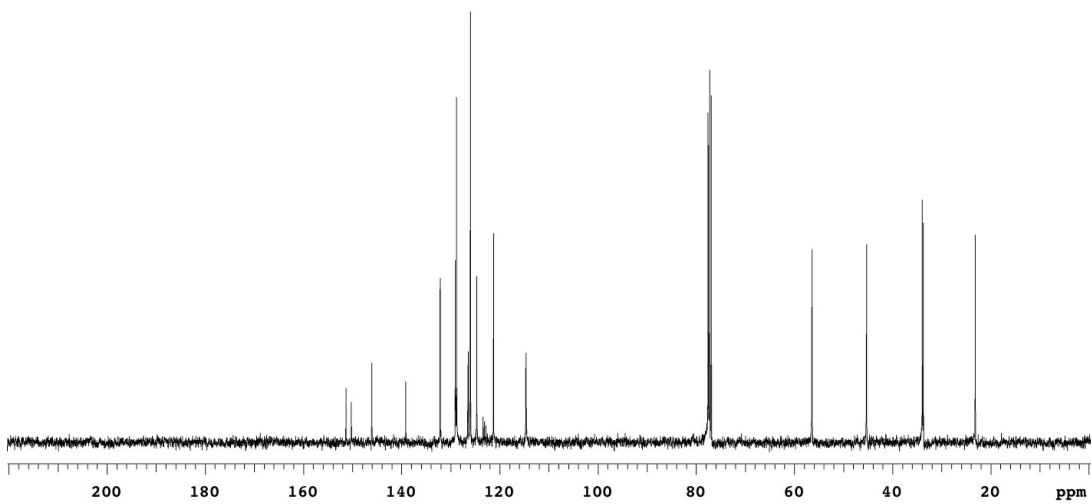

### 3af

STANDARD 1H OBSERVE

yu3-149-1  
yu3-149-1

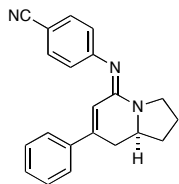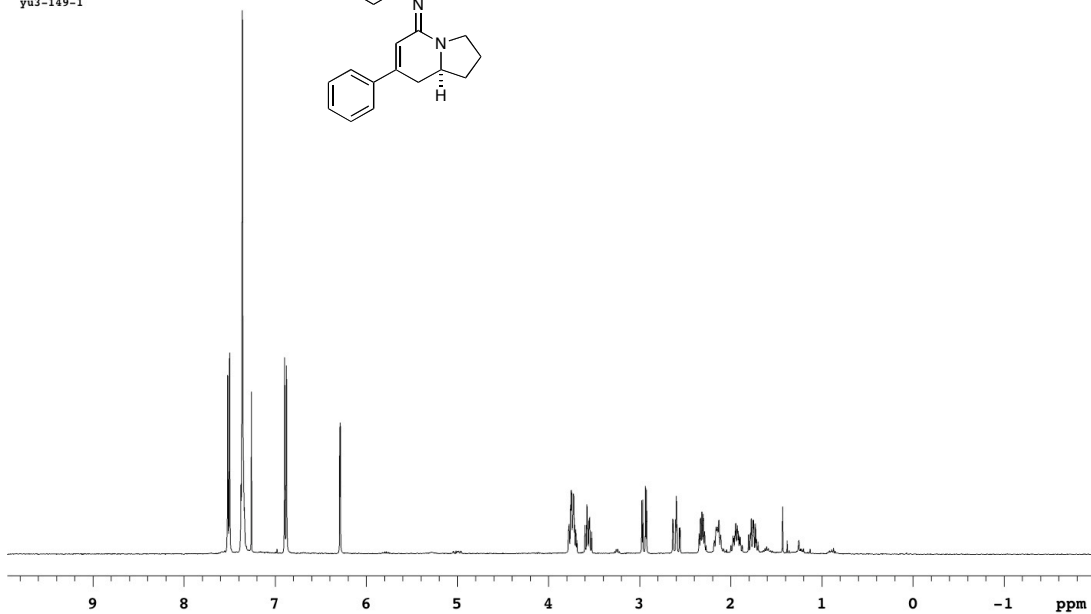

13C OBSERVE

yu3-149-1  
yu3-149-1

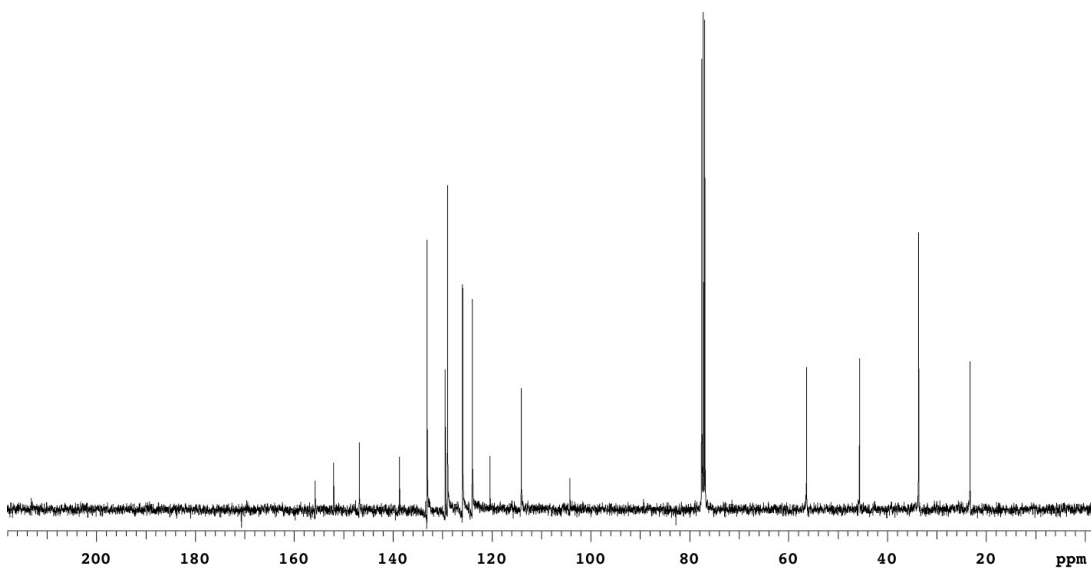

**6a**

STANDARD 1H OBSERVE

yu3-147-1  
yu3-147-1

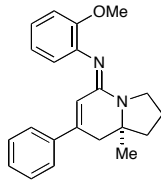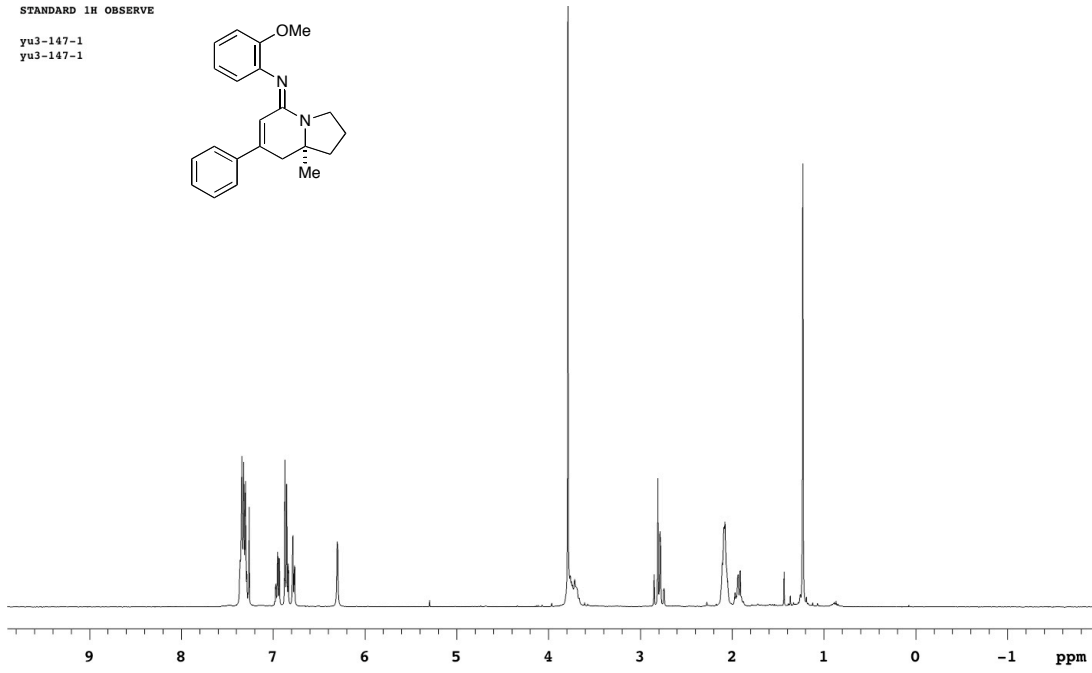

13C OBSERVE

yu3-147-1  
yu3-147-1

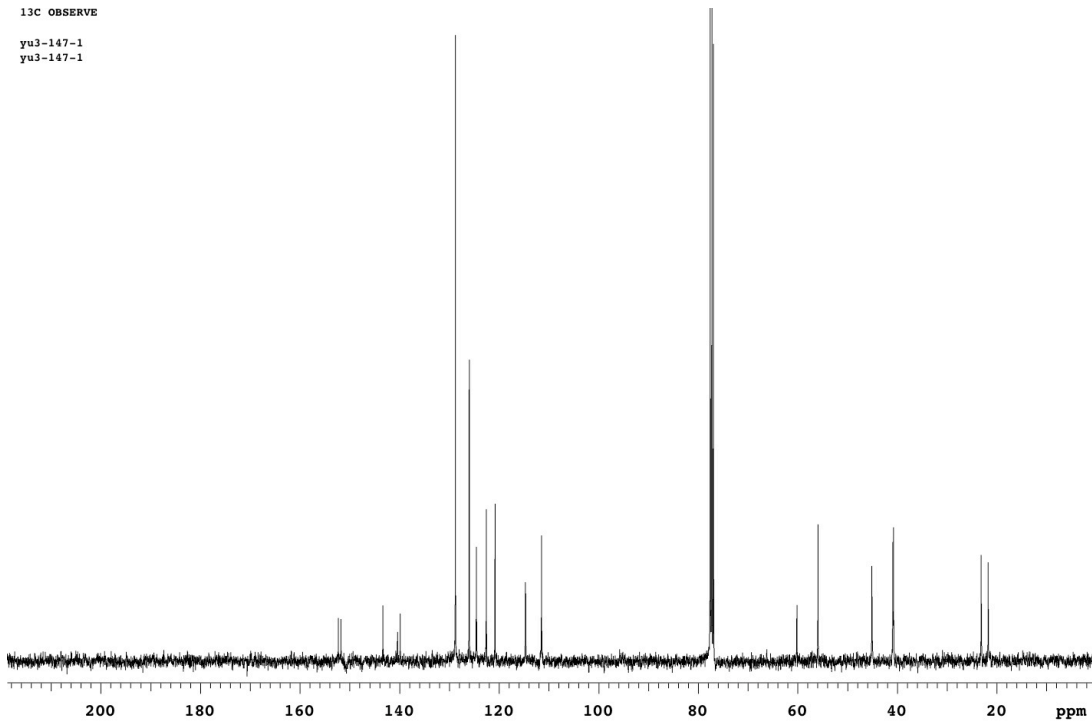

7a

STANDARD 1H OBSERVE

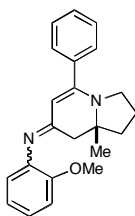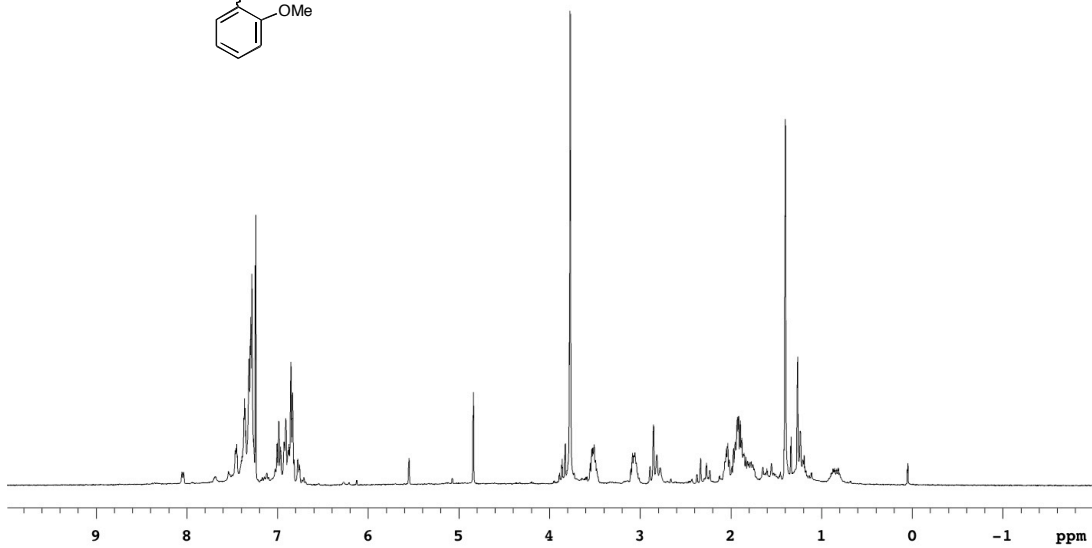

13C OBSERVE

yu3-147-2

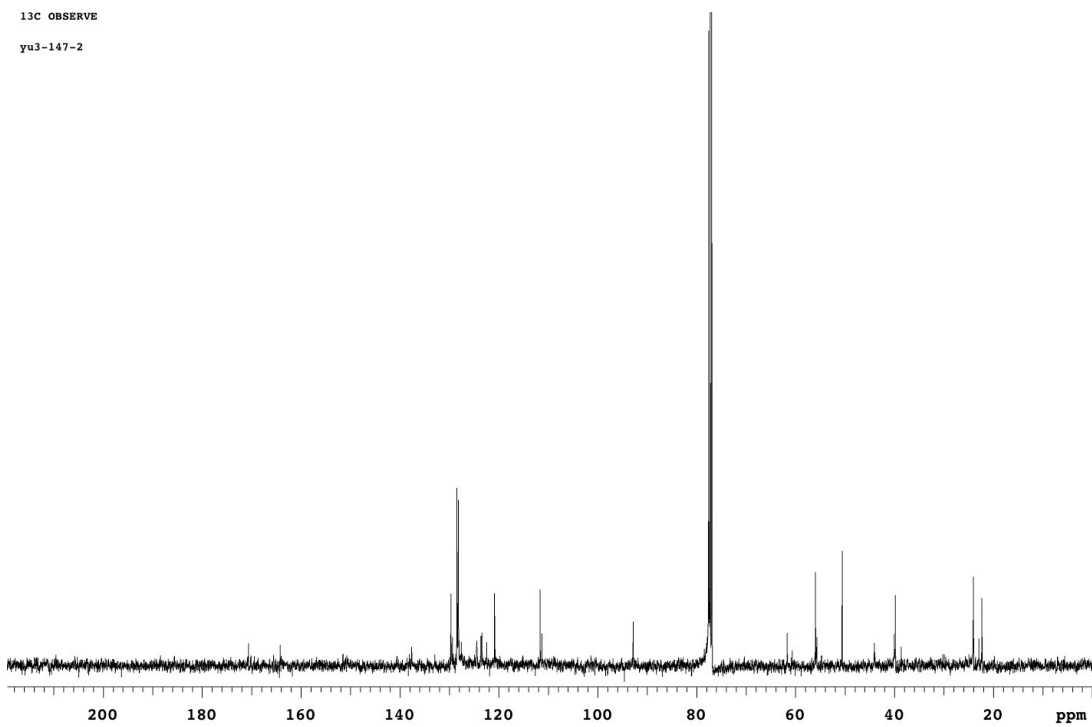



**9a**

STANDARD 1H OBSERVE

yu3-168-1  
yu3-168-1

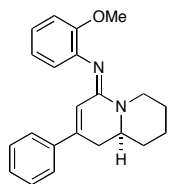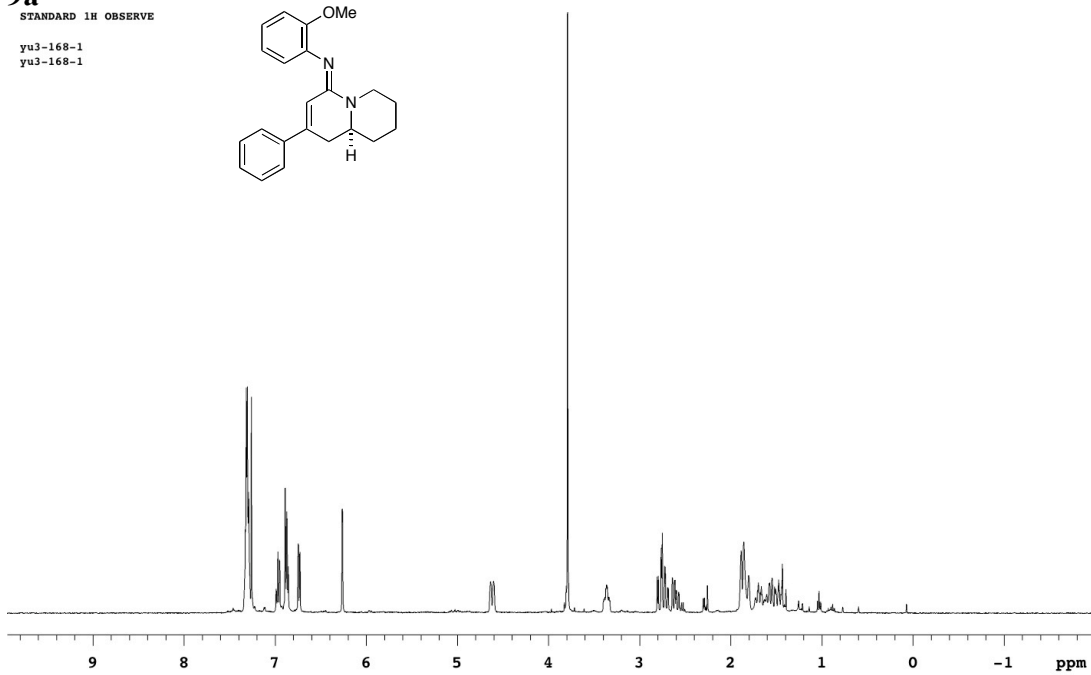

13C OBSERVE

yu3-168-1  
yu3-168-1

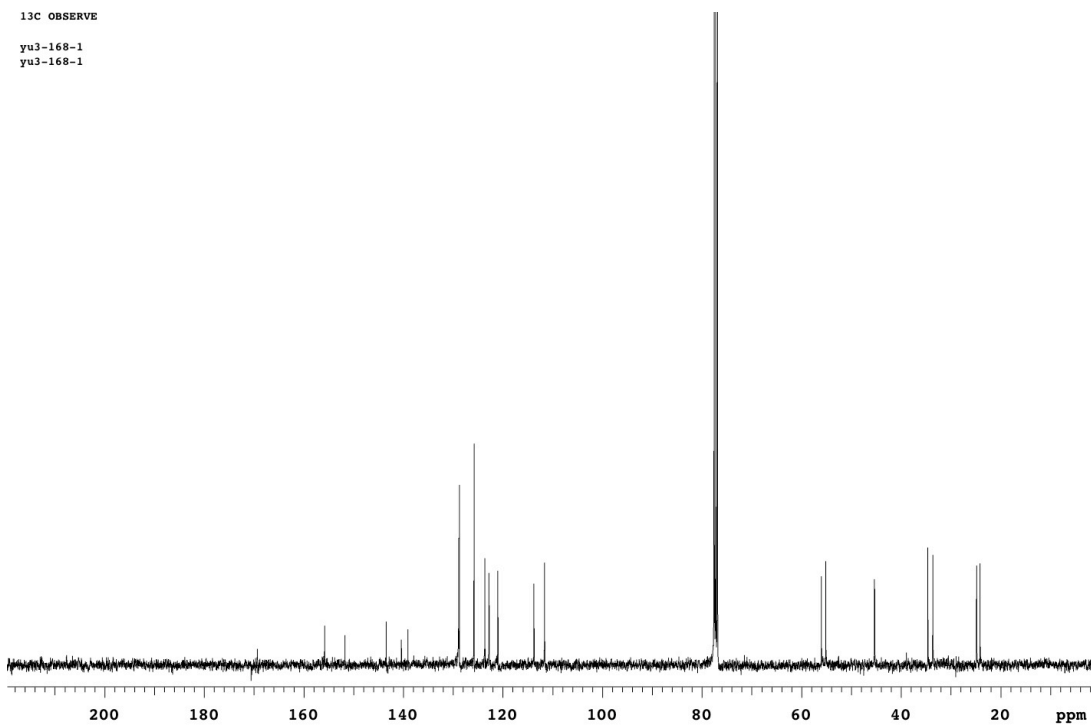

### 3bc

STANDARD 1H OBSERVE

yu3-73

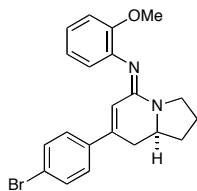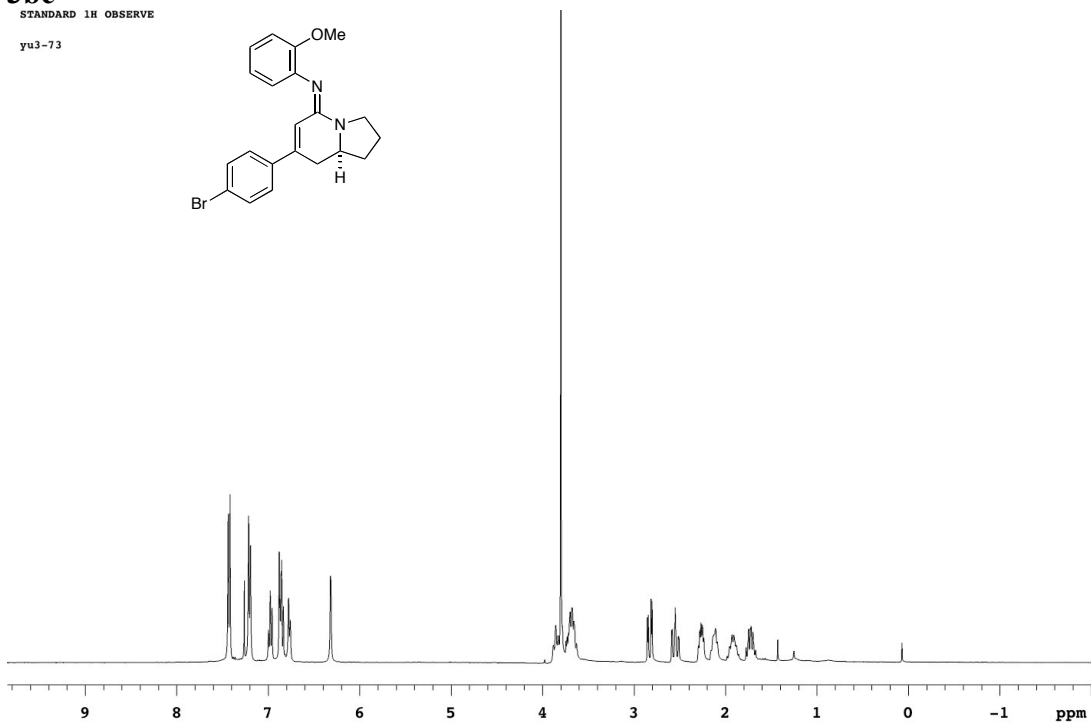

13C OBSERVE

yu3-73

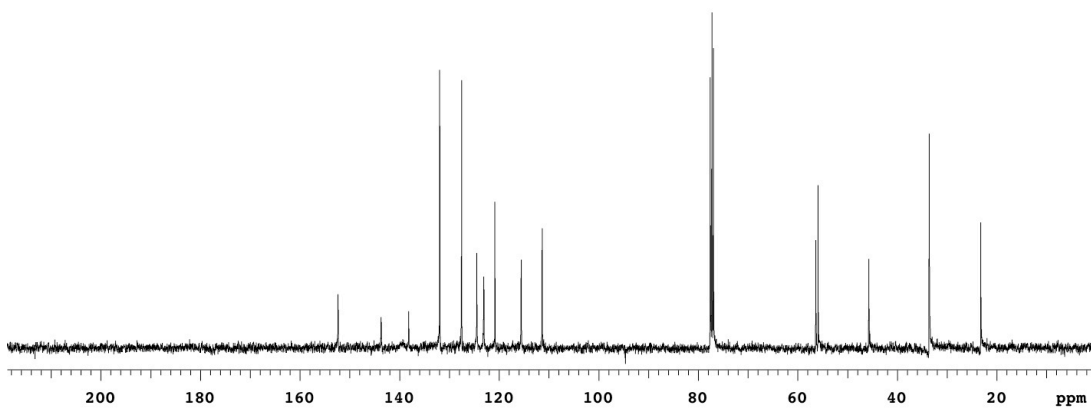

3cc

STANDARD 1H OBSERVE

yu3-117-1

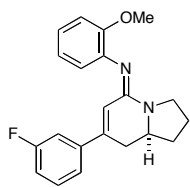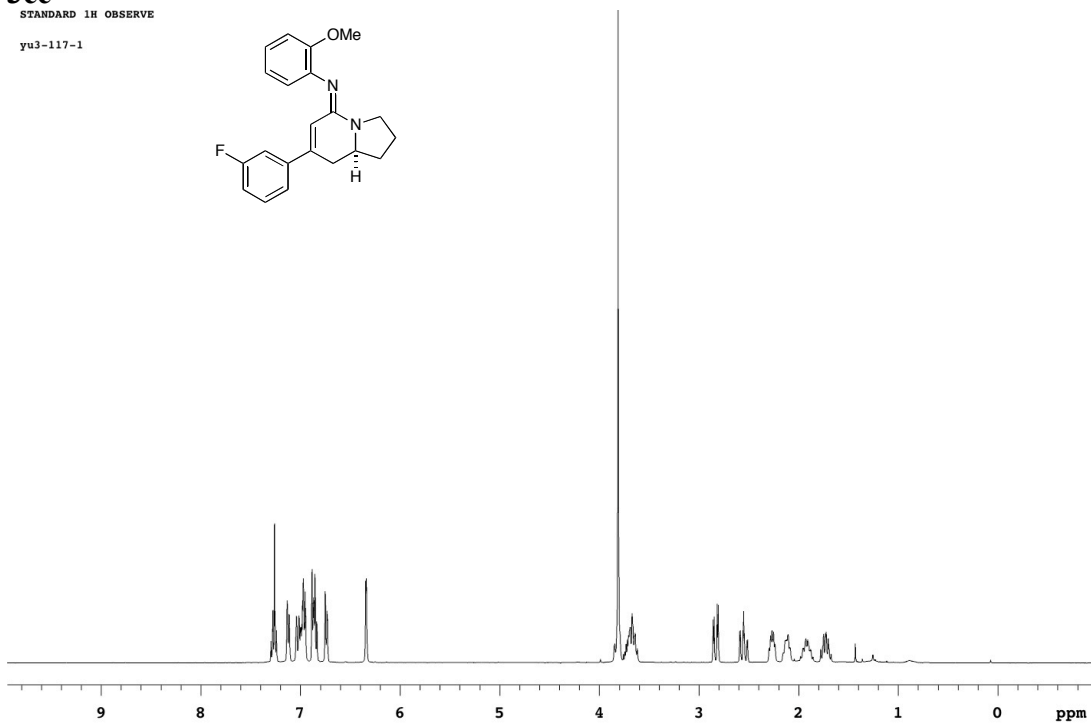

13C OBSERVE

yu3-117-1

yu3-117

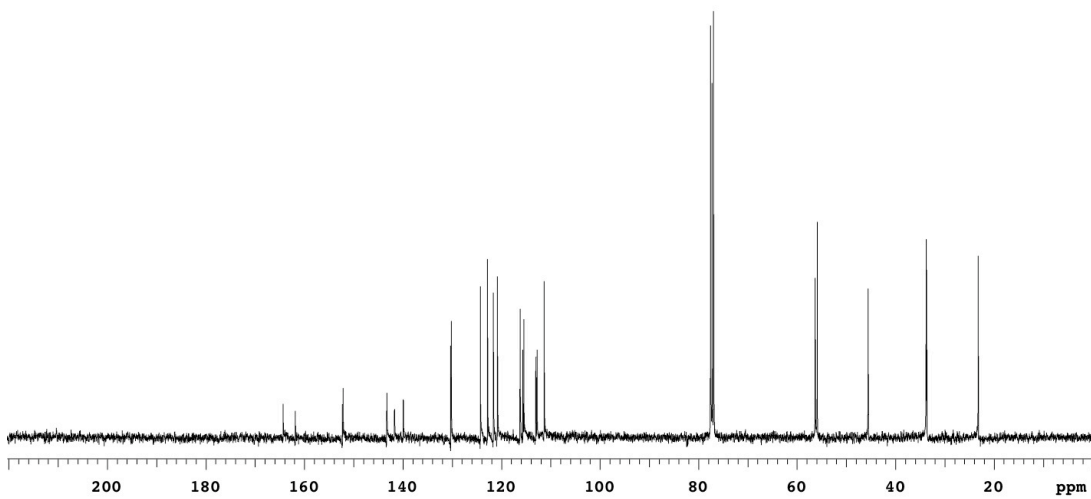

### 3dc

STANDARD 1H OBSERVE

yu3-150  
yu3-150

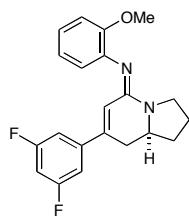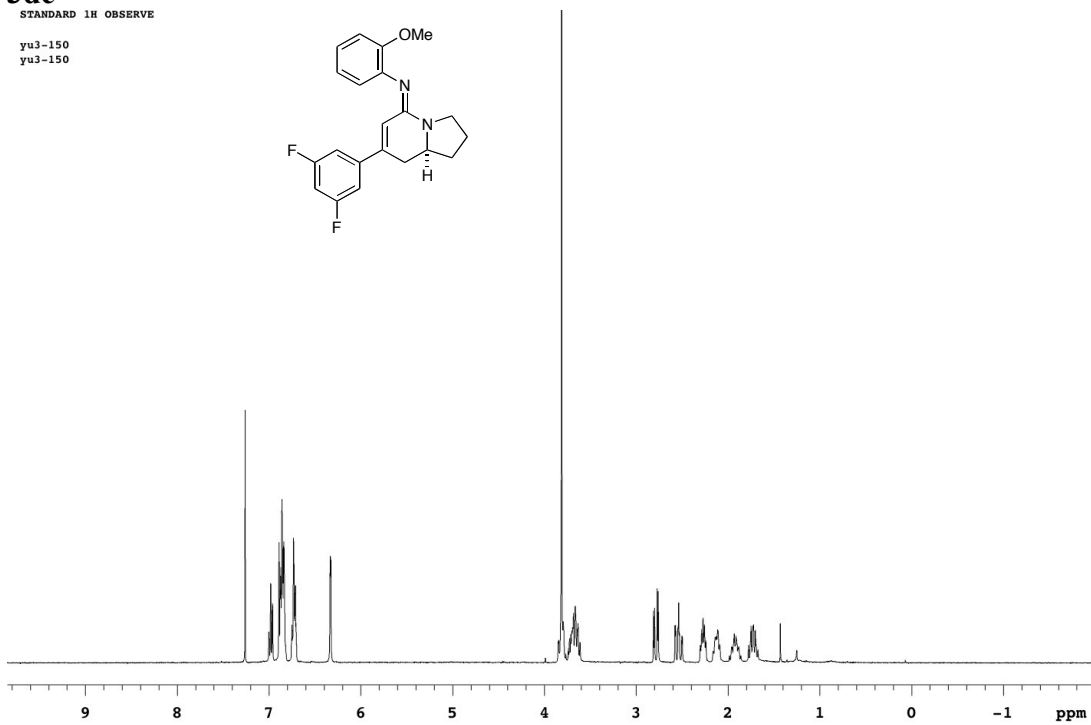

13C OBSERVE

yu3-150  
yu3-150

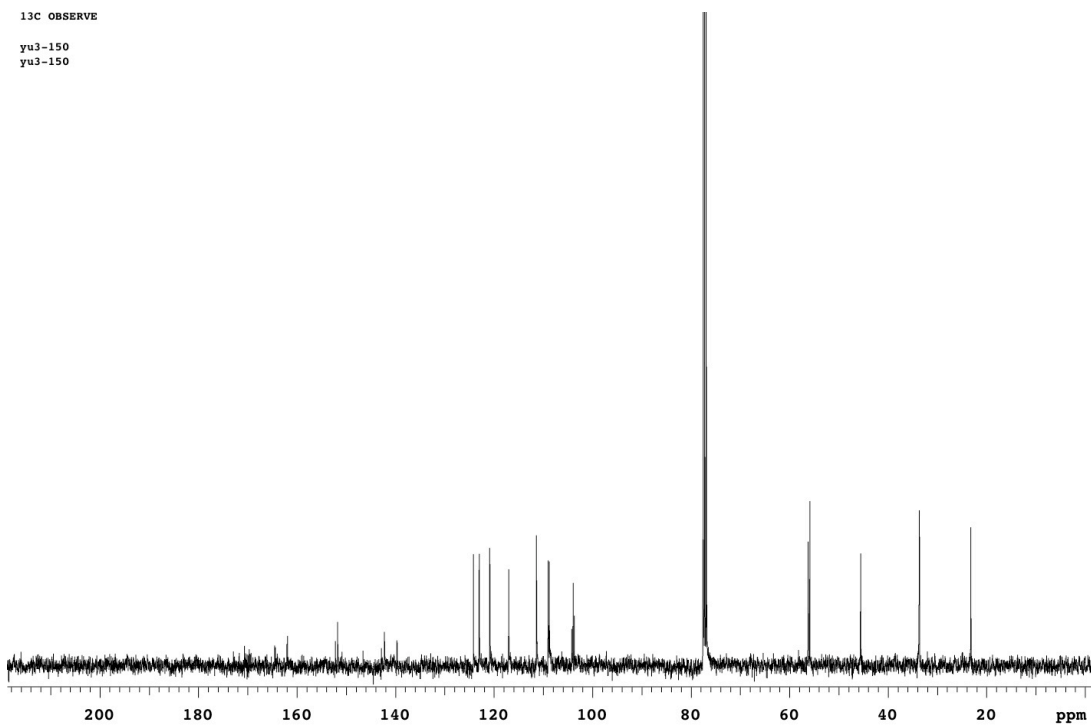

3ec

STANDARD 1H OBSERVE

yu3-98

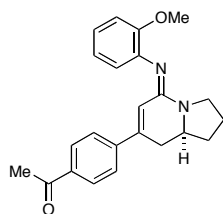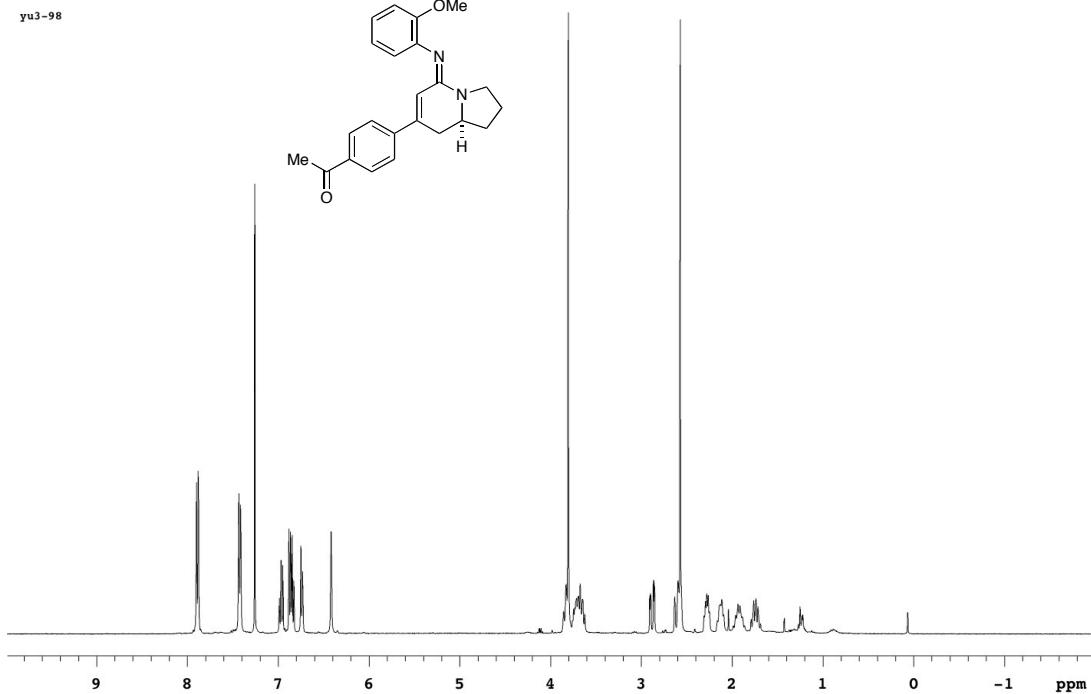

13C OBSERVE

yu3-98

yu3-98

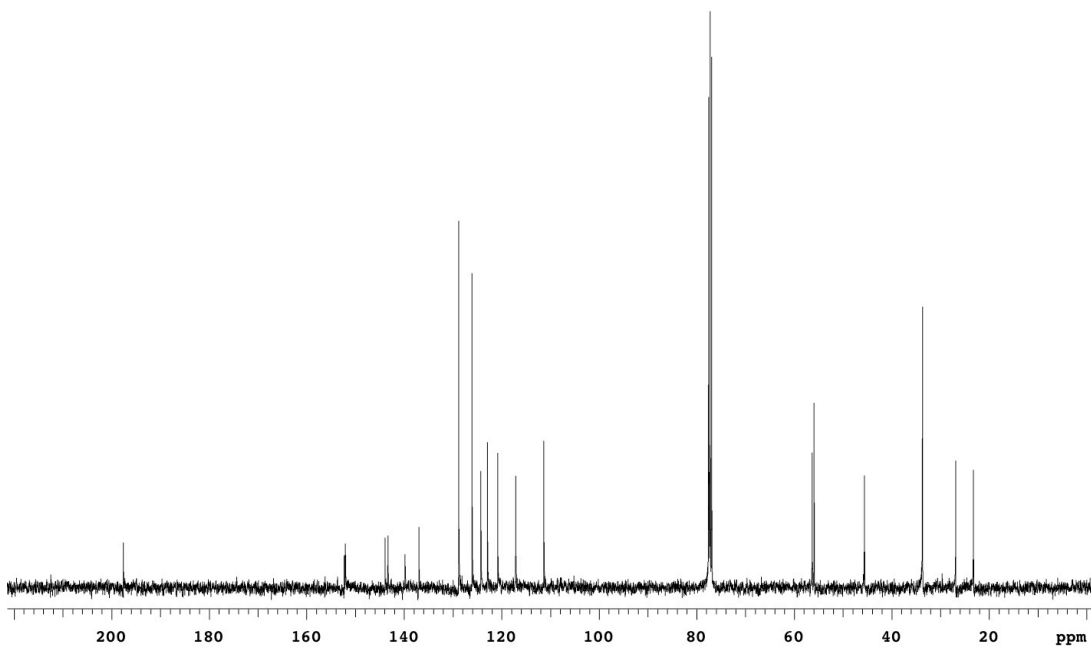

**3fc**

STANDARD 1H OBSERVE

yu3-124

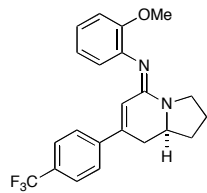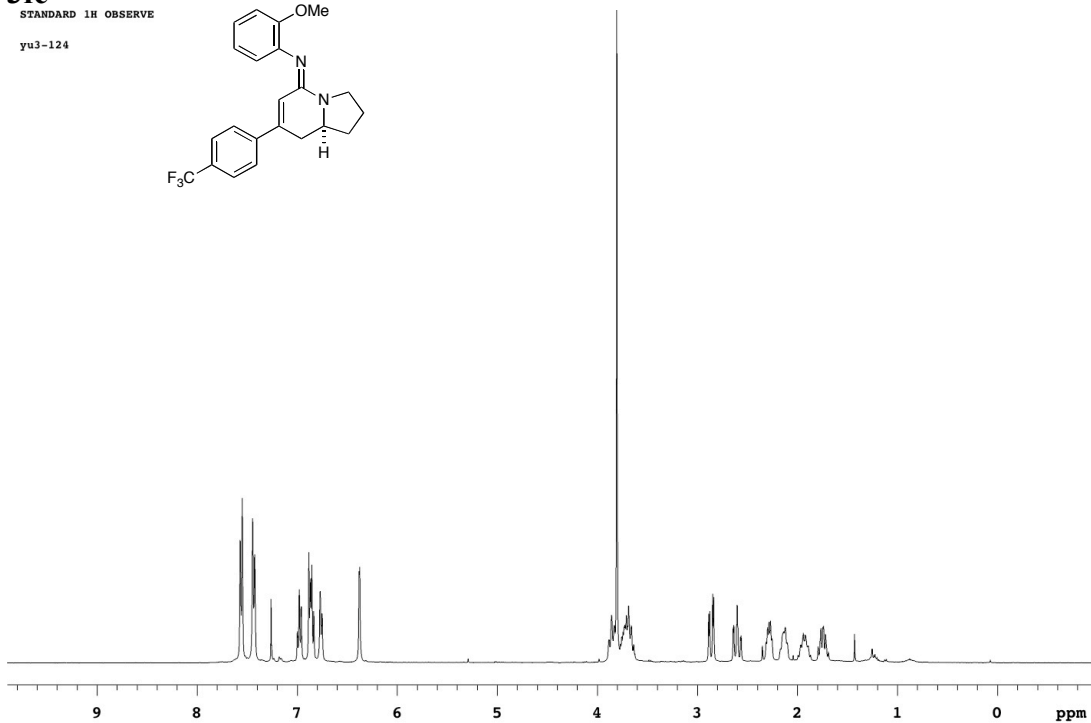

13C OBSERVE

yu3-124

yu3-124

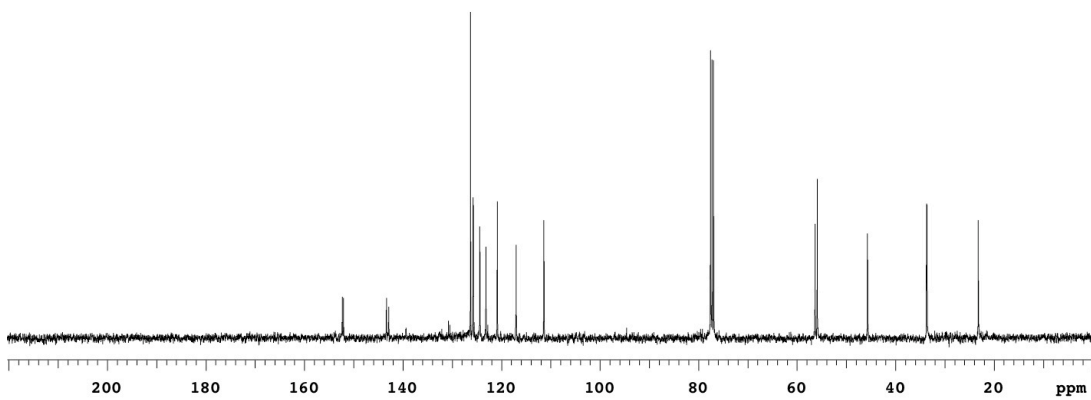

**3gc**

STANDARD 1H OBSERVE

yu3-118-1

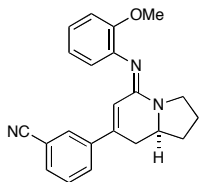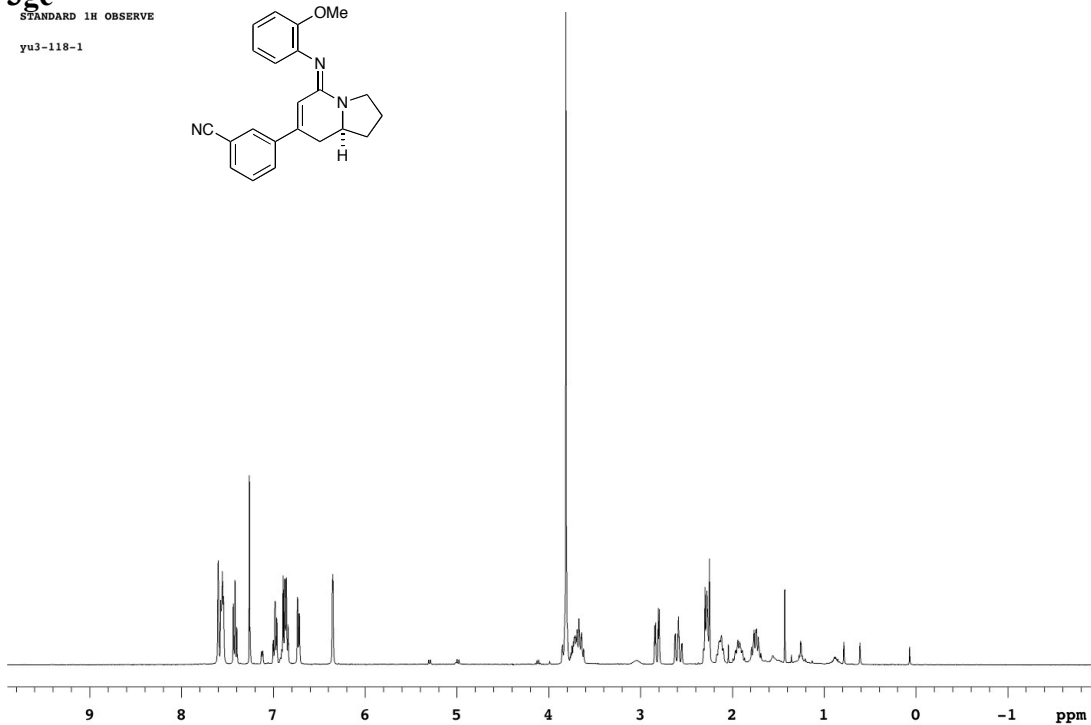

13C OBSERVE

yu3-118-1

yu3-118-1

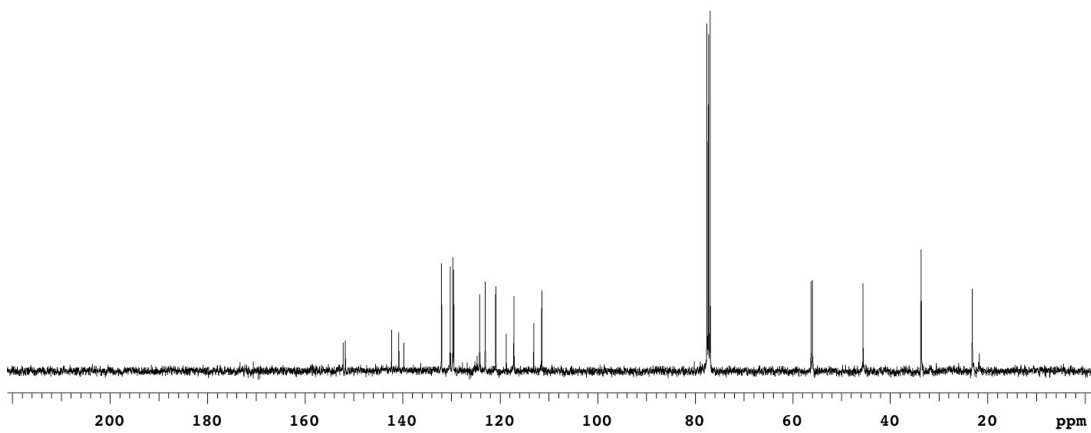

### 3hc

STANDARD 1H OBSERVE

yu3-125

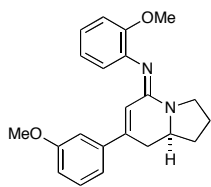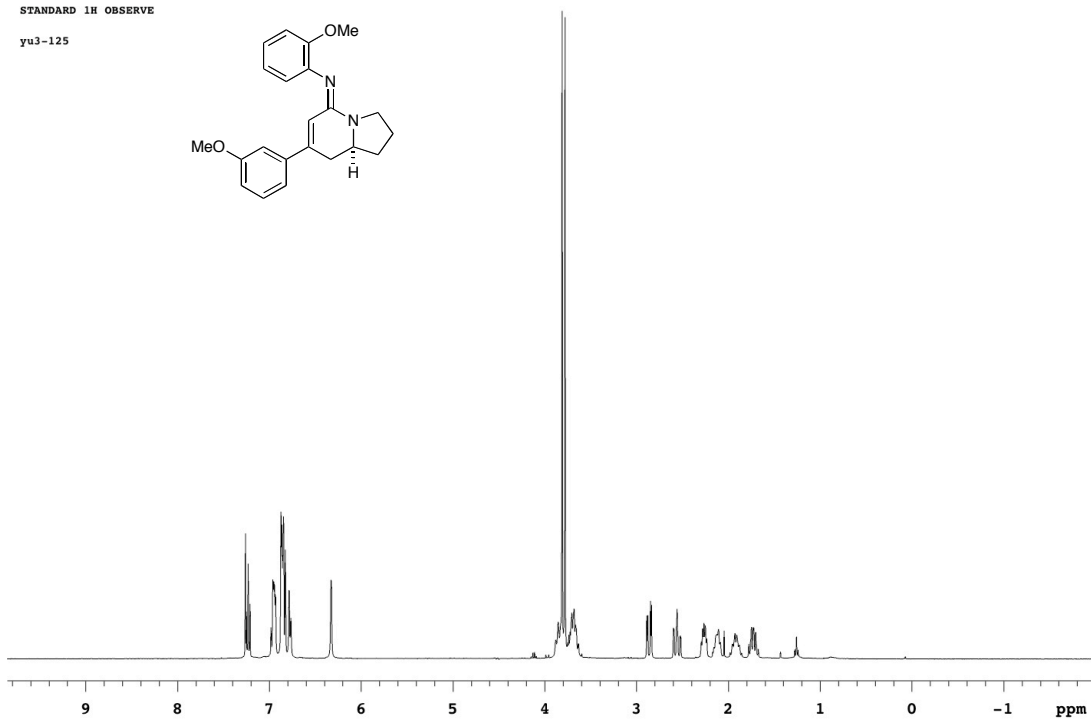

13C OBSERVE

yu3-125

yu3-125

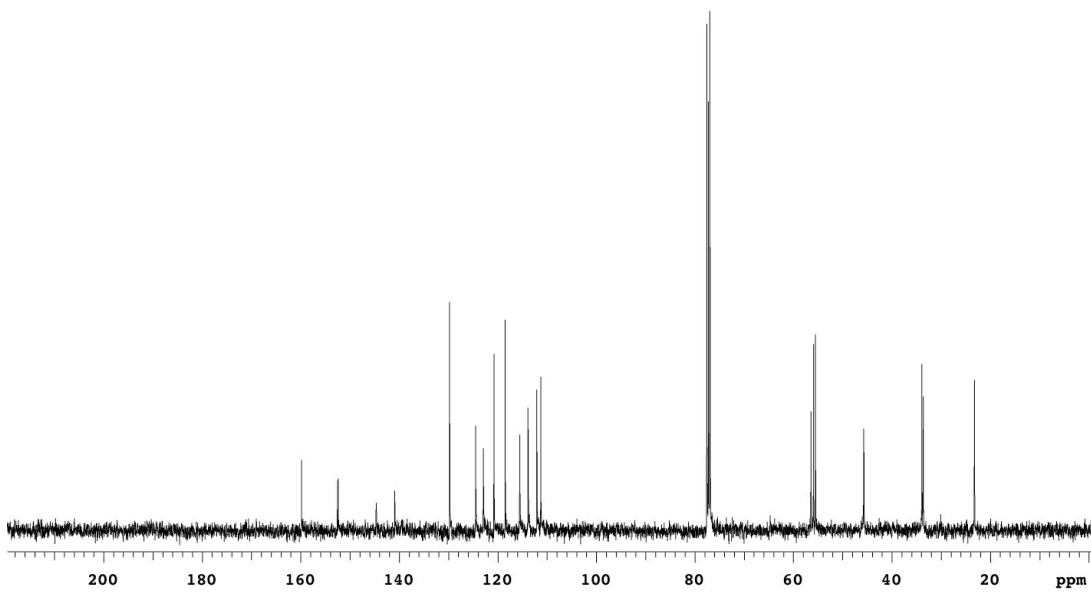



### 3ic

STANDARD 1H OBSERVE

yu3-123-1

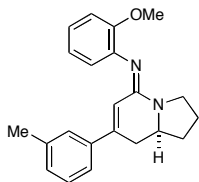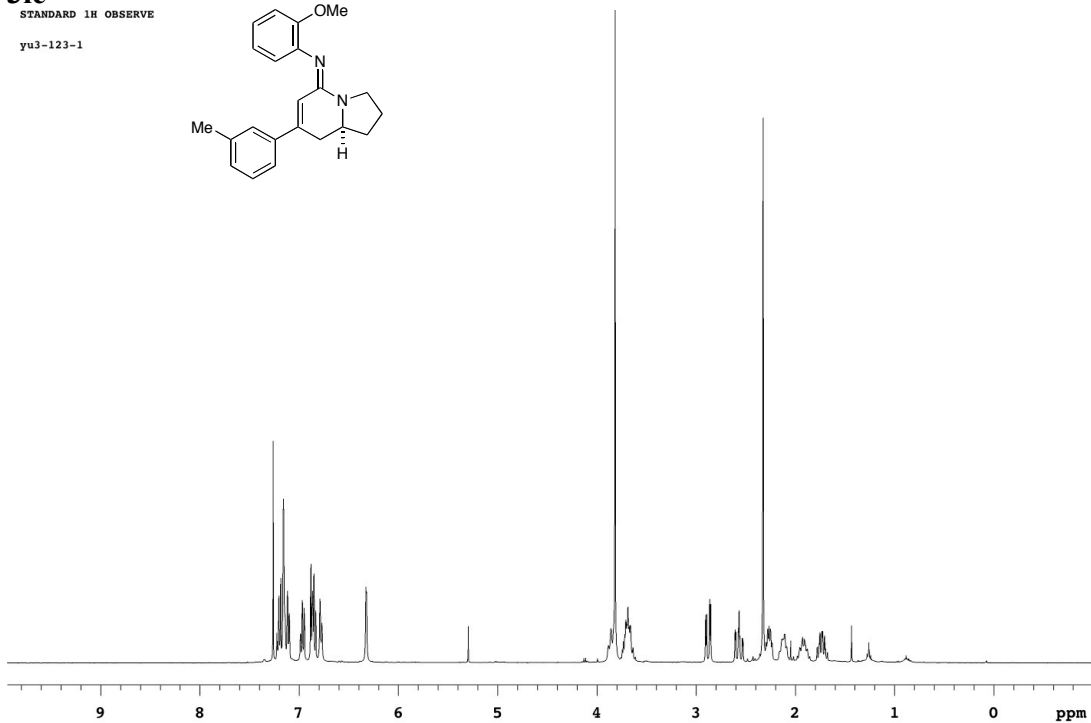

13C OBSERVE

yu3-123-1

yu3-123-1

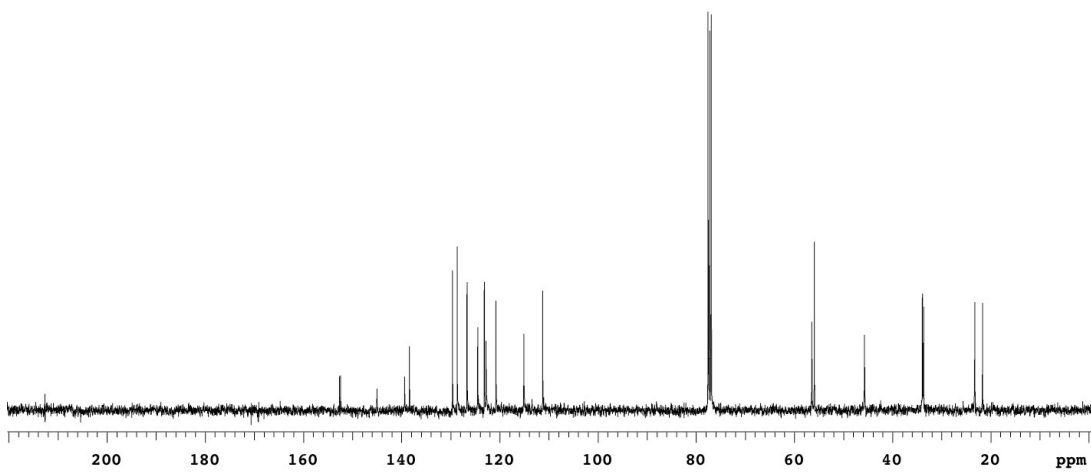

# 3ie

STANDARD 1H OBSERVE

yu3-242

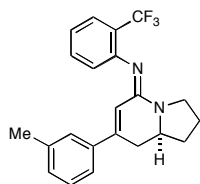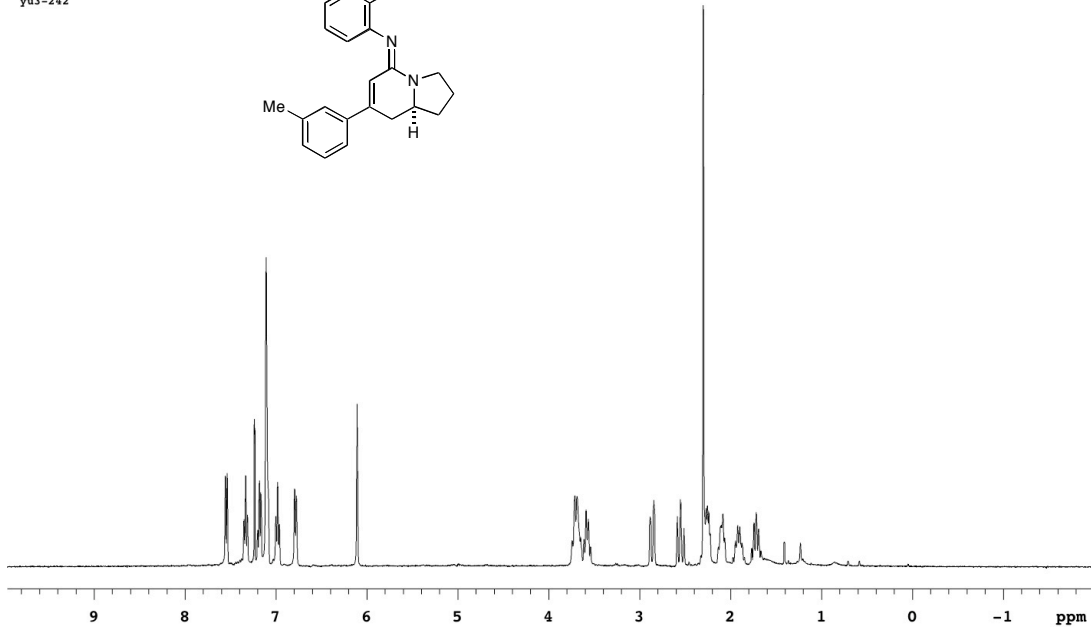

13C OBSERVE

yu3-242

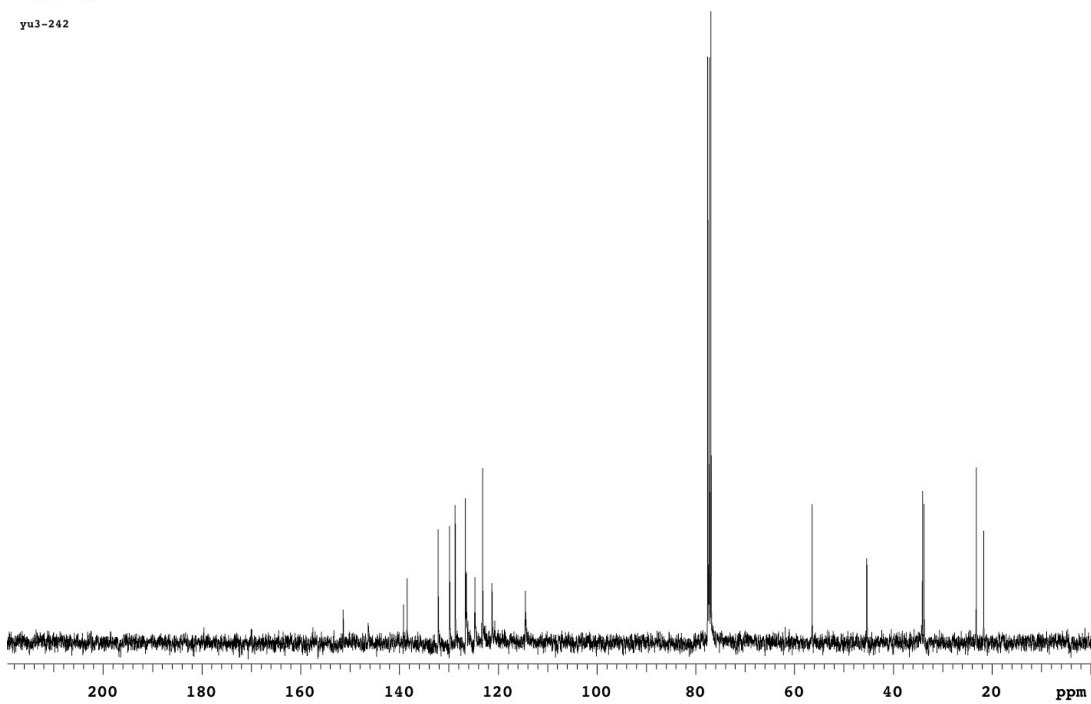

**3jc**

STANDARD 1H OBSERVE

yu3-122-1

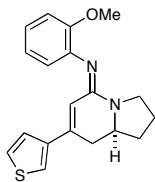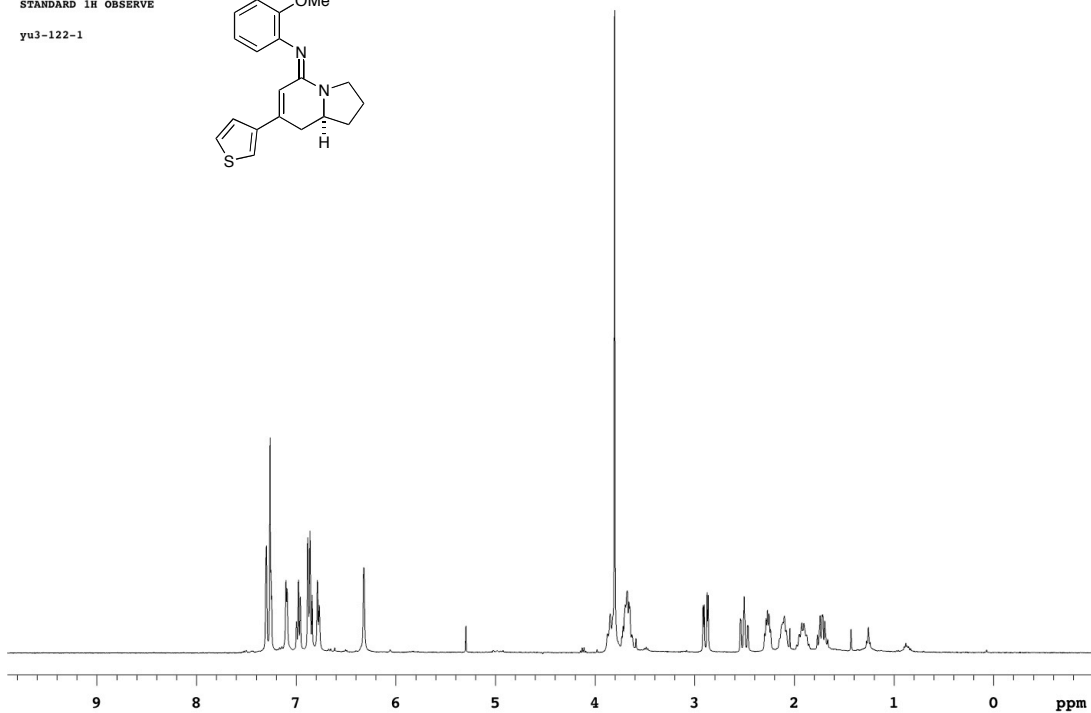

13C OBSERVE

yu3-122-1

yu3-122-1

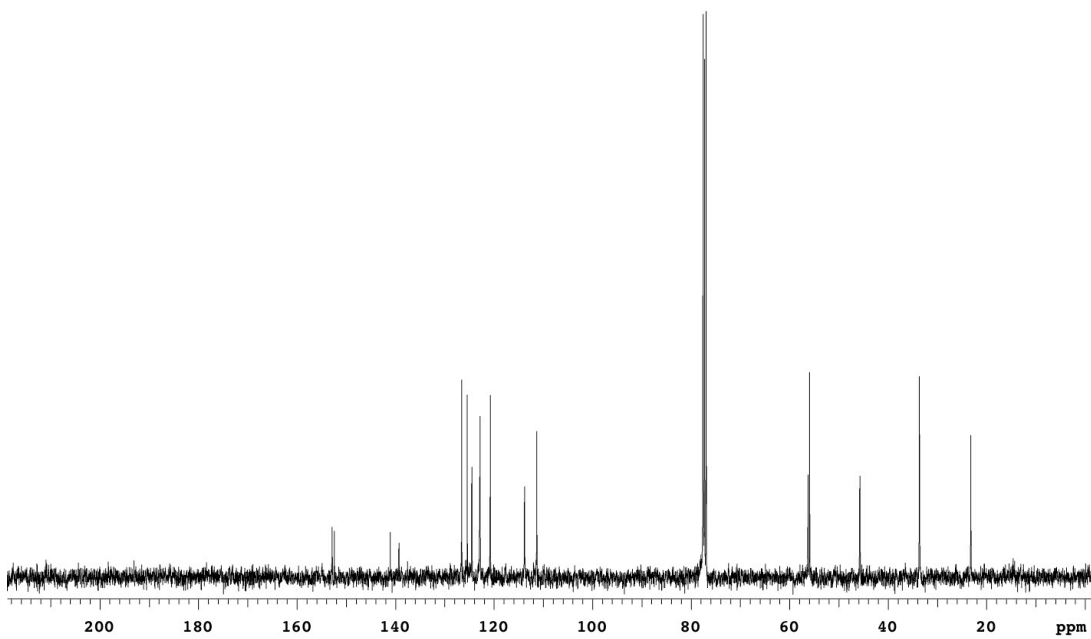

3je

STANDARD 1H OBSERVE

yu3-243

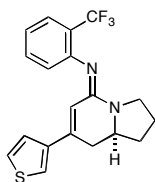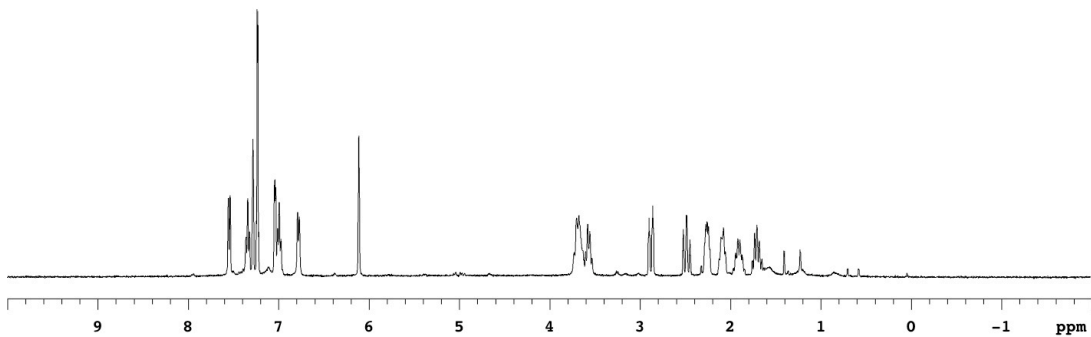

13C OBSERVE

yu3-243

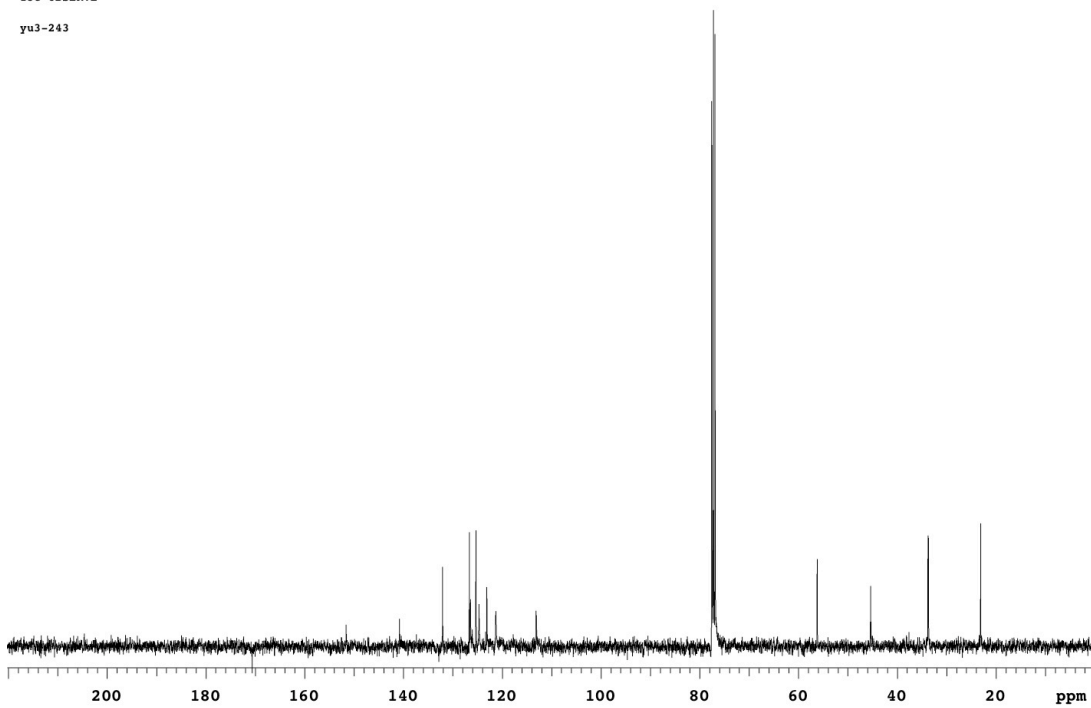

**3kc**

STANDARD 1H OBSERVE

yu3-72-1

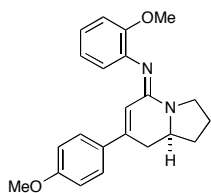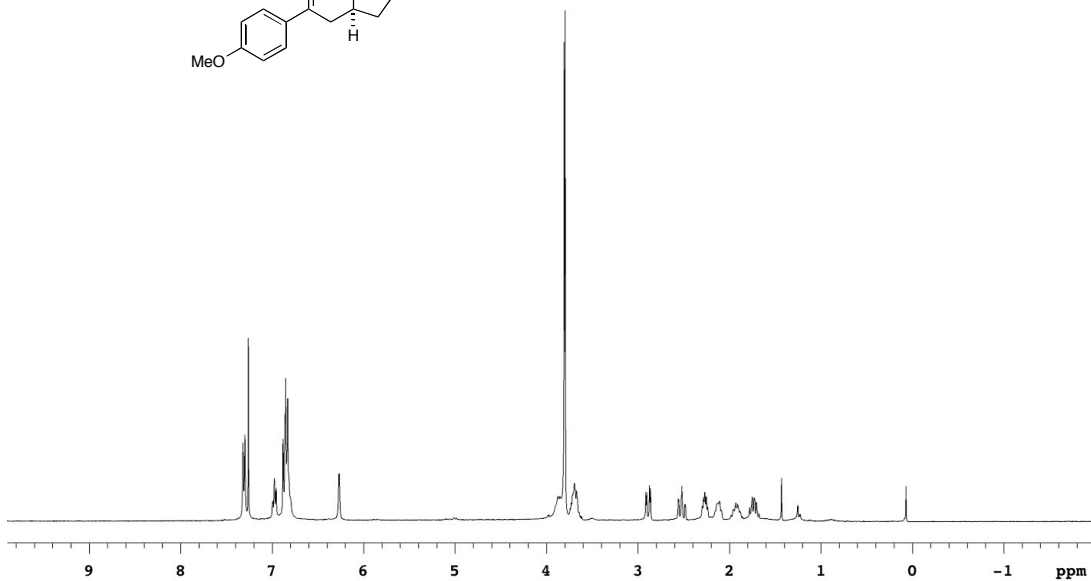

13C OBSERVE

yu3-72-1

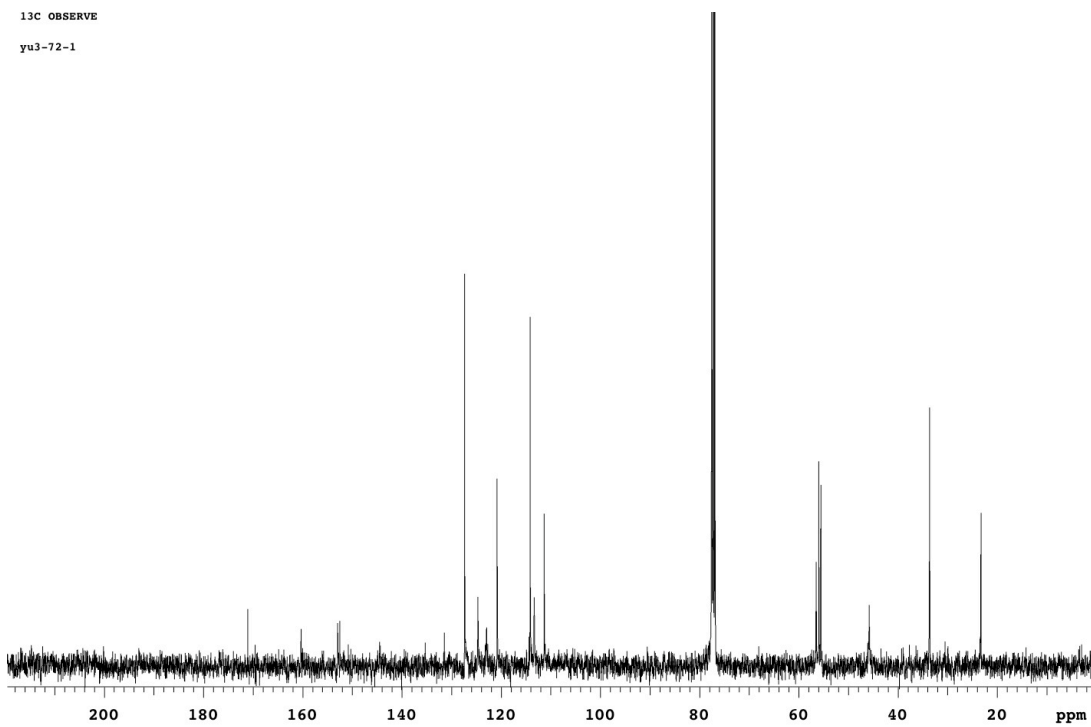

4kc

STANDARD 1H OBSERVE

yu3-72-2

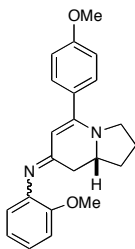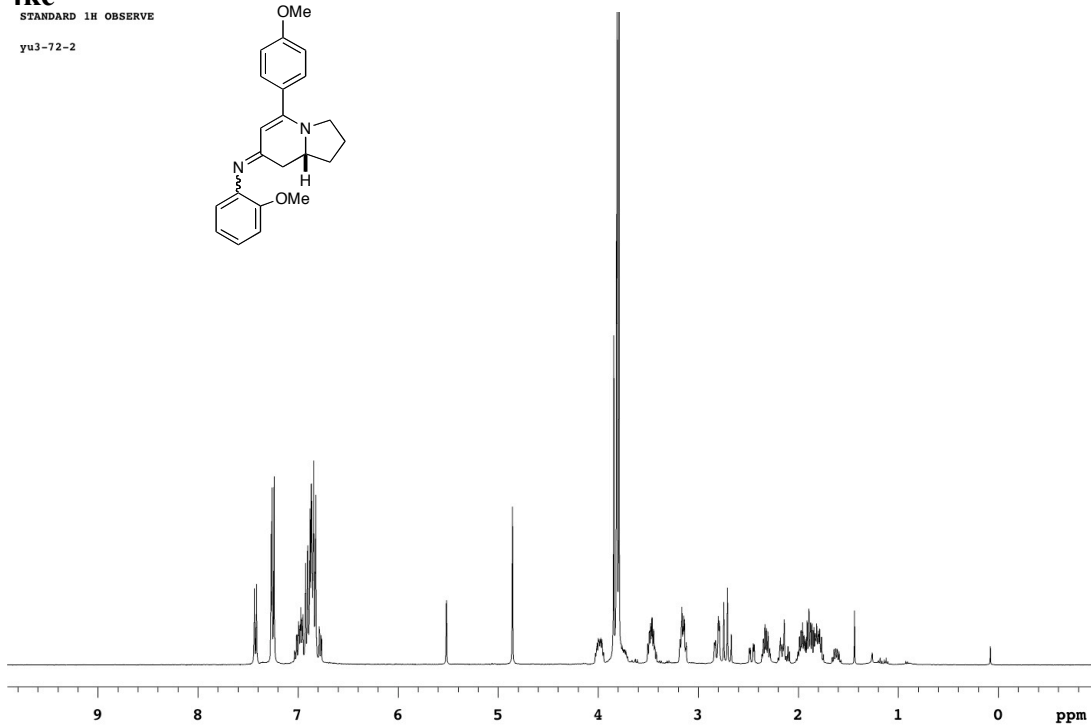

13C OBSERVE

yu3-72-2

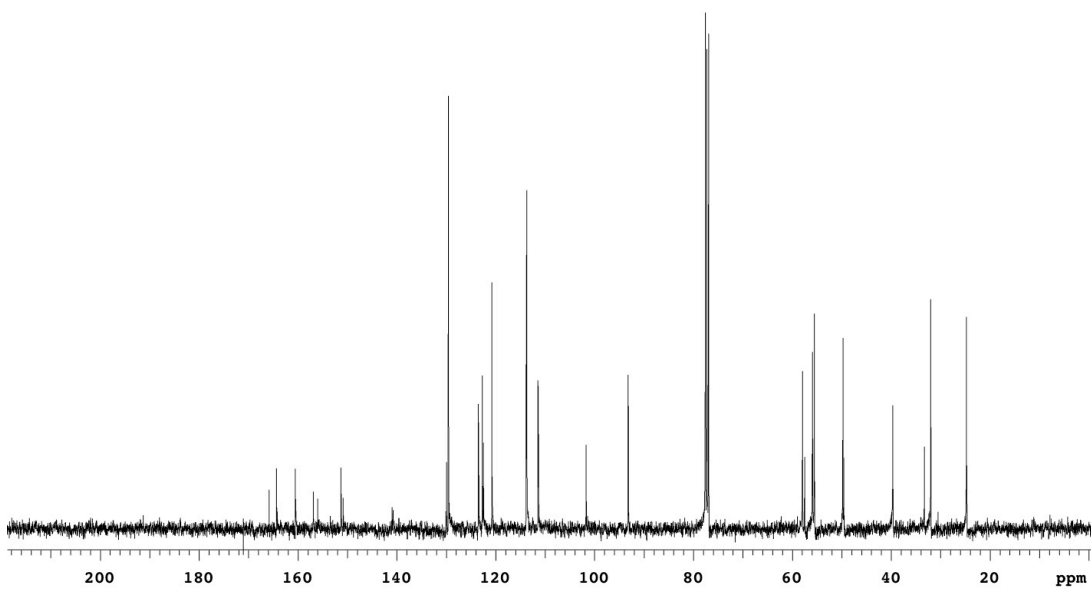

3ke

STANDARD 1H OBSERVE

yu3-114-1

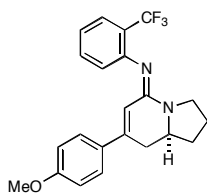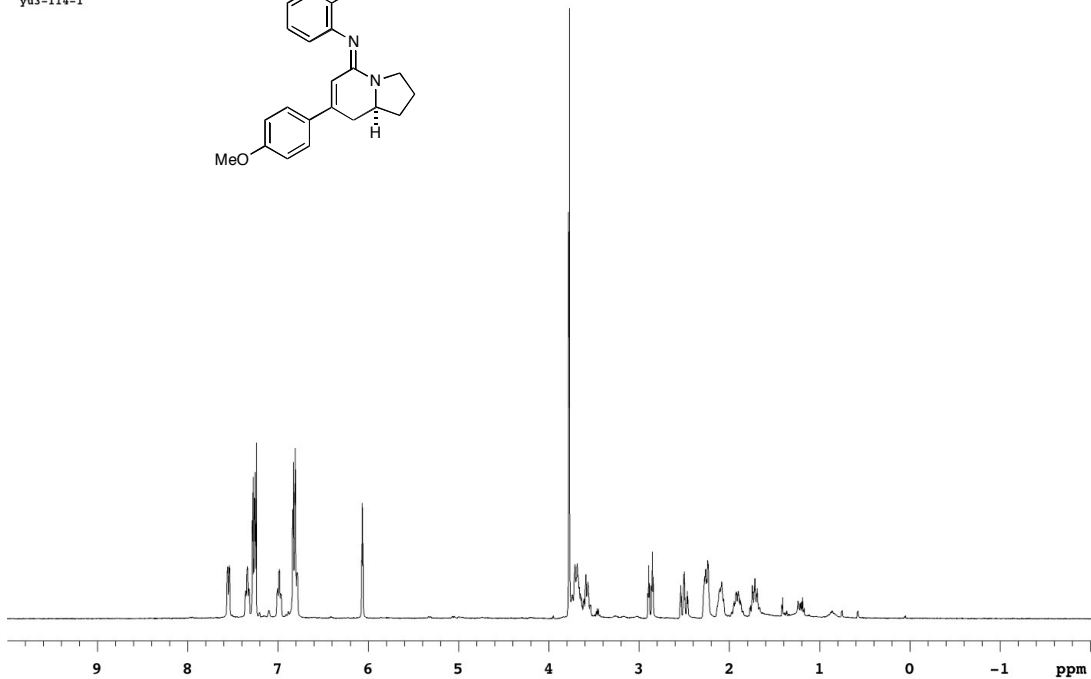

13C OBSERVE

yu3-114-1

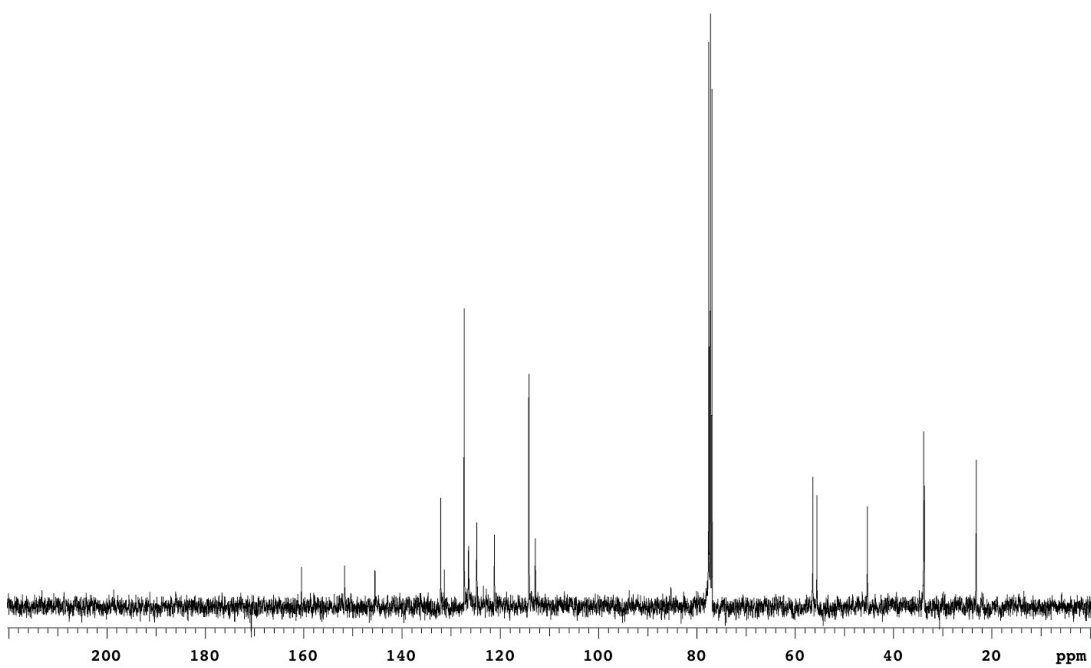

4ke

STANDARD 1H OBSERVE

yu3-114-2

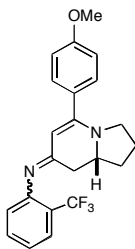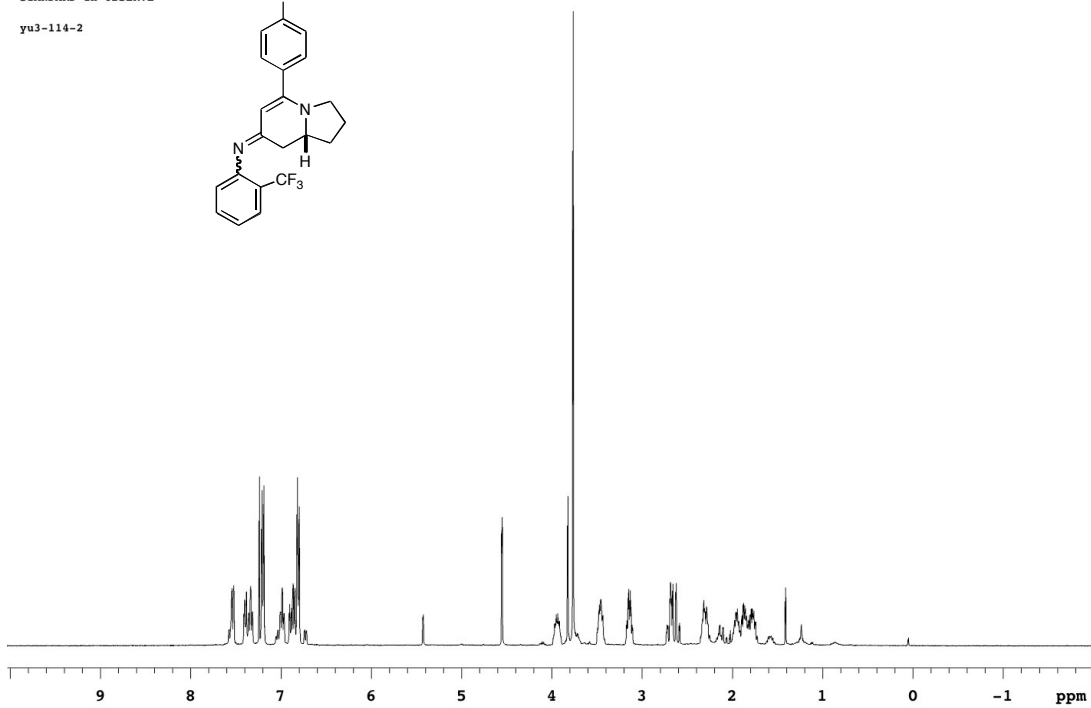

13C OBSERVE

yu3-114-2

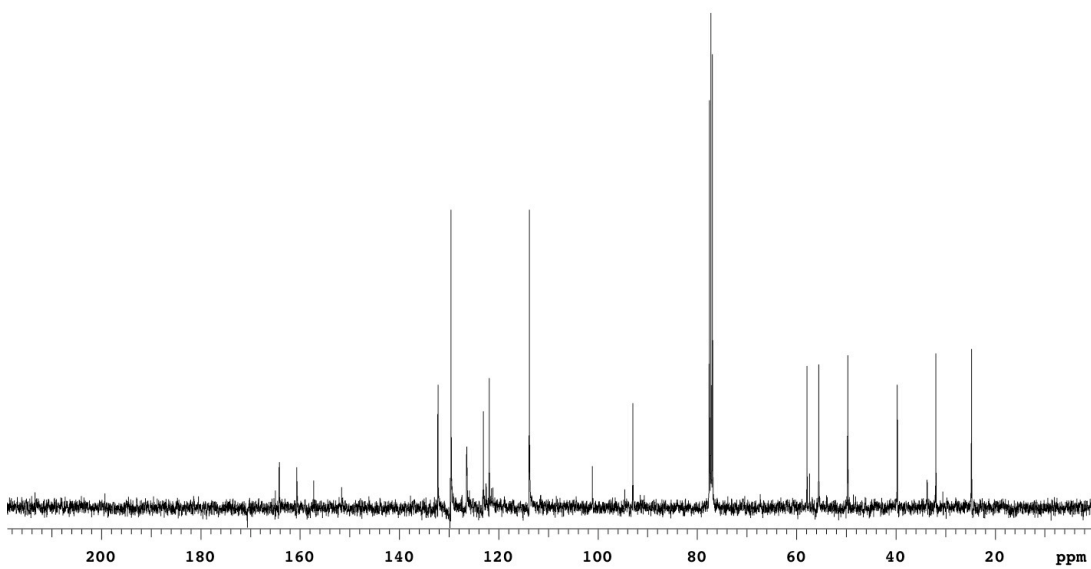



**6d**

STANDARD 1H OBSERVE

yu3-173-1  
yu3-173-1

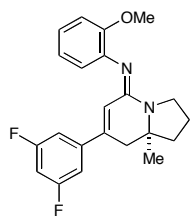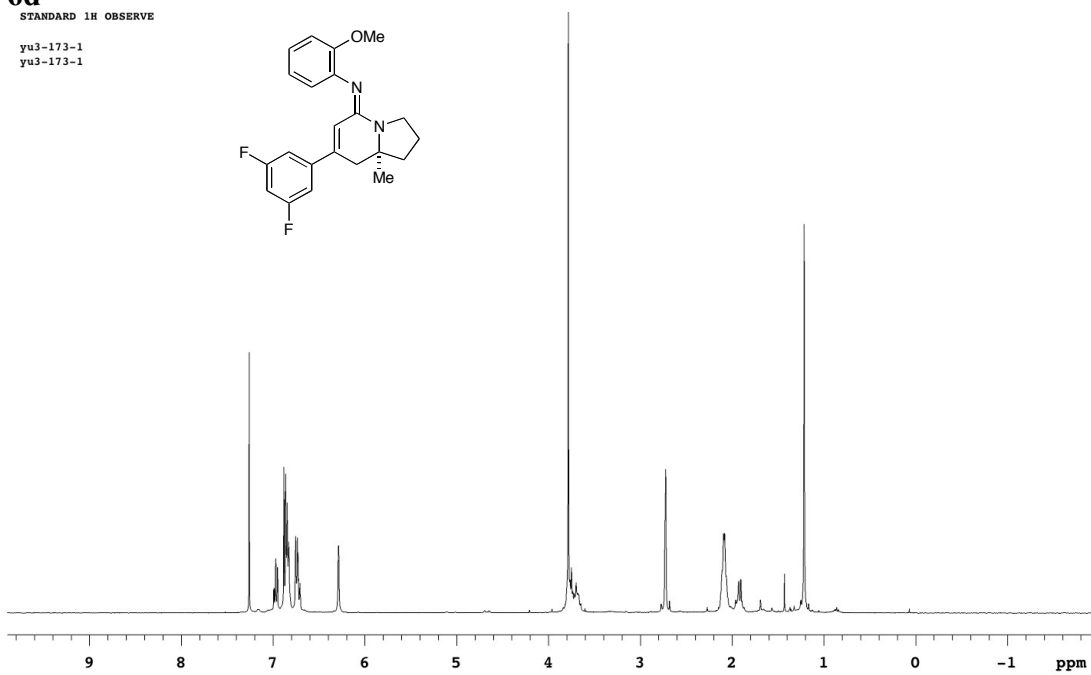

13C OBSERVE

yu3-173-1  
yu3-173-1

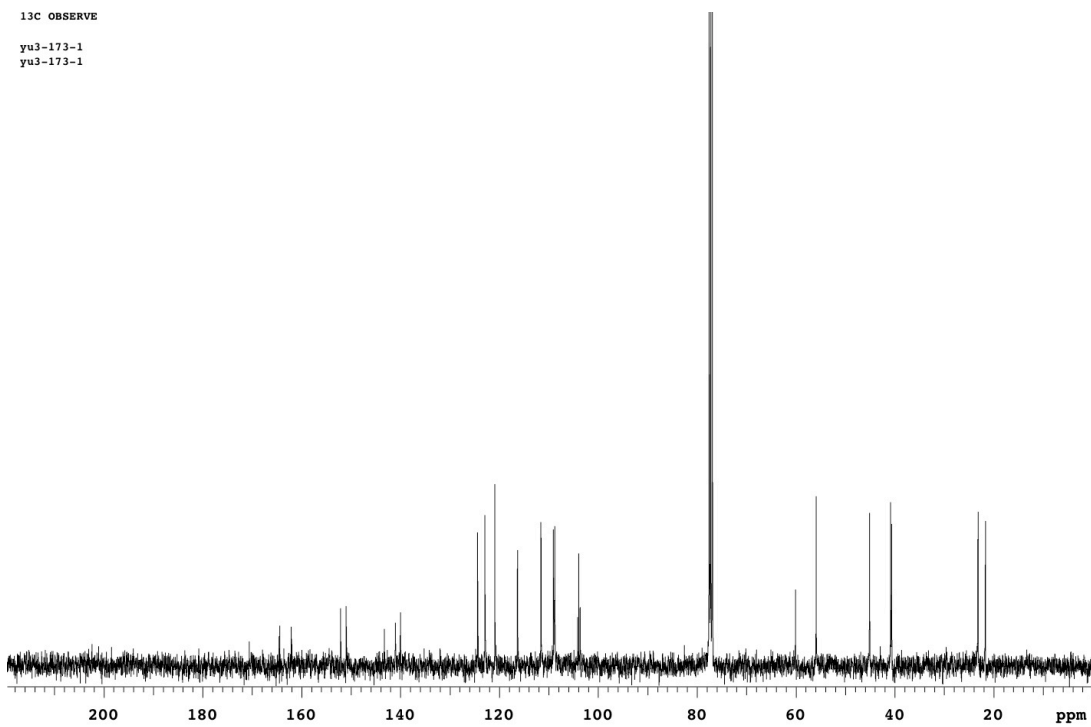

6e

STANDARD 1H OBSERVE

yu3-152-1  
yu3-152-1

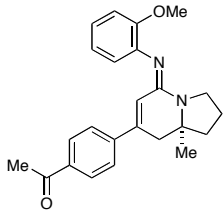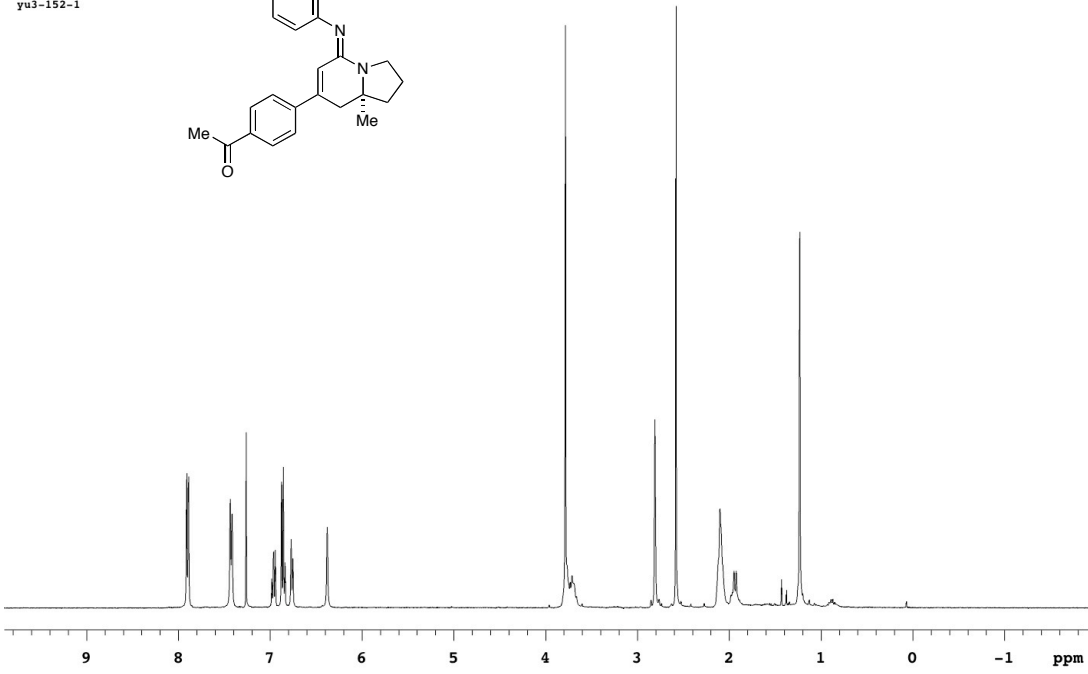

13C OBSERVE

yu3-152-1  
yu3-152-1

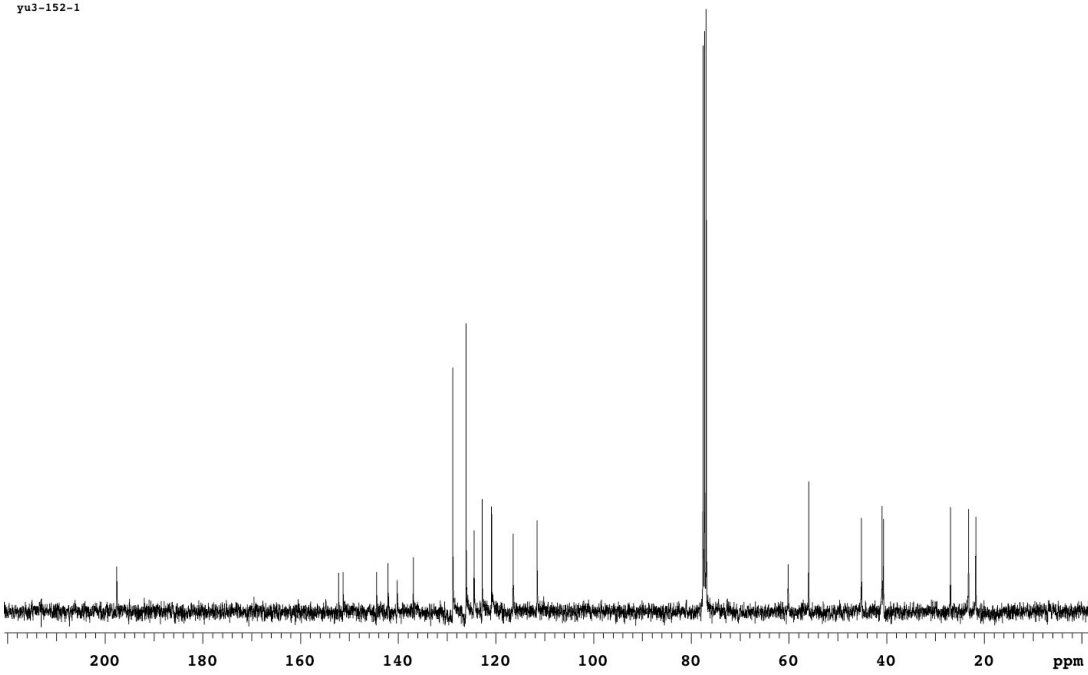

**6h**

STANDARD 1H OBSERVE

yu3-174-1  
yu3-174-1

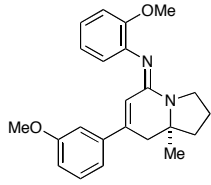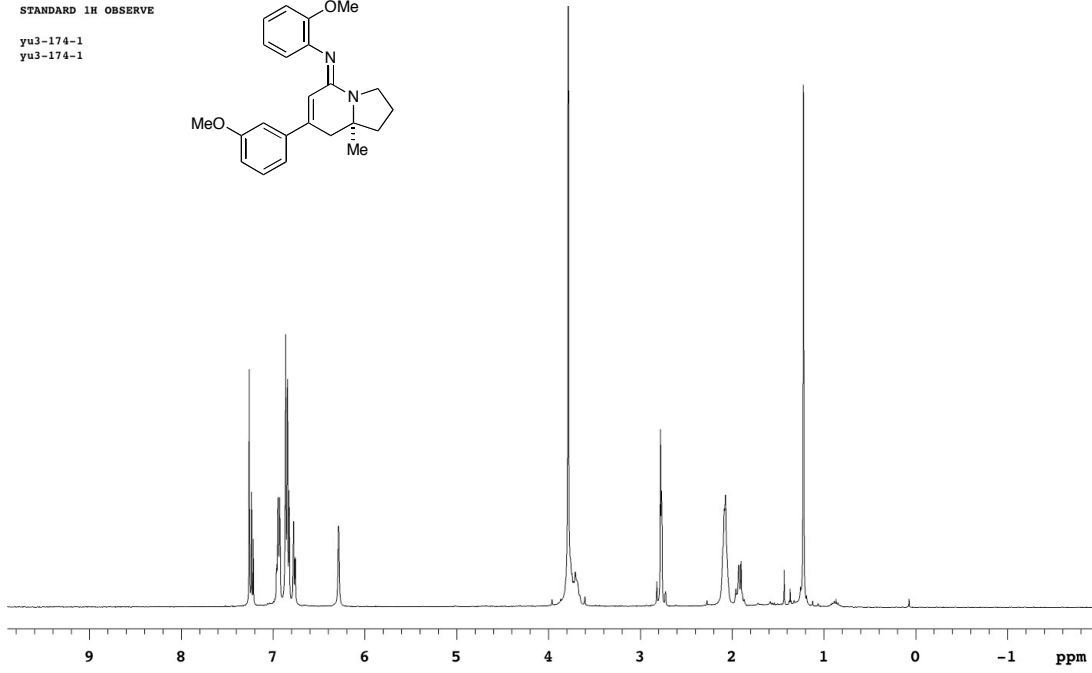

13C OBSERVE

yu3-174-1  
yu3-174-1

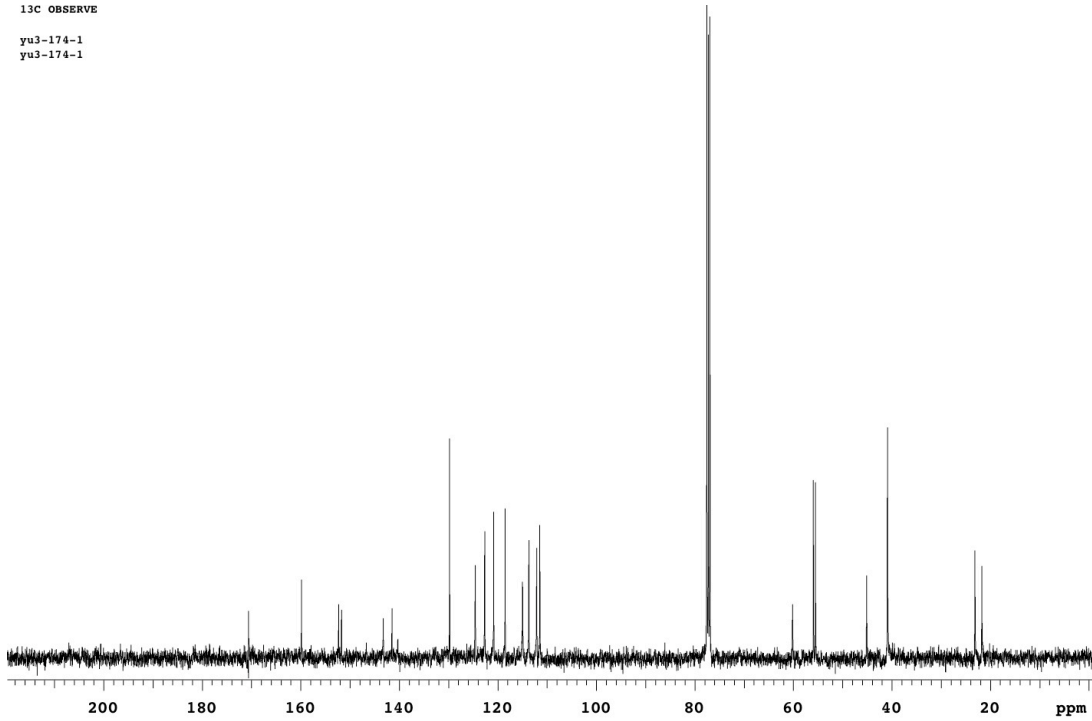

**3lc**

STANDARD 1H OBSERVE

yu3-95

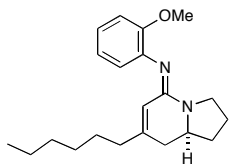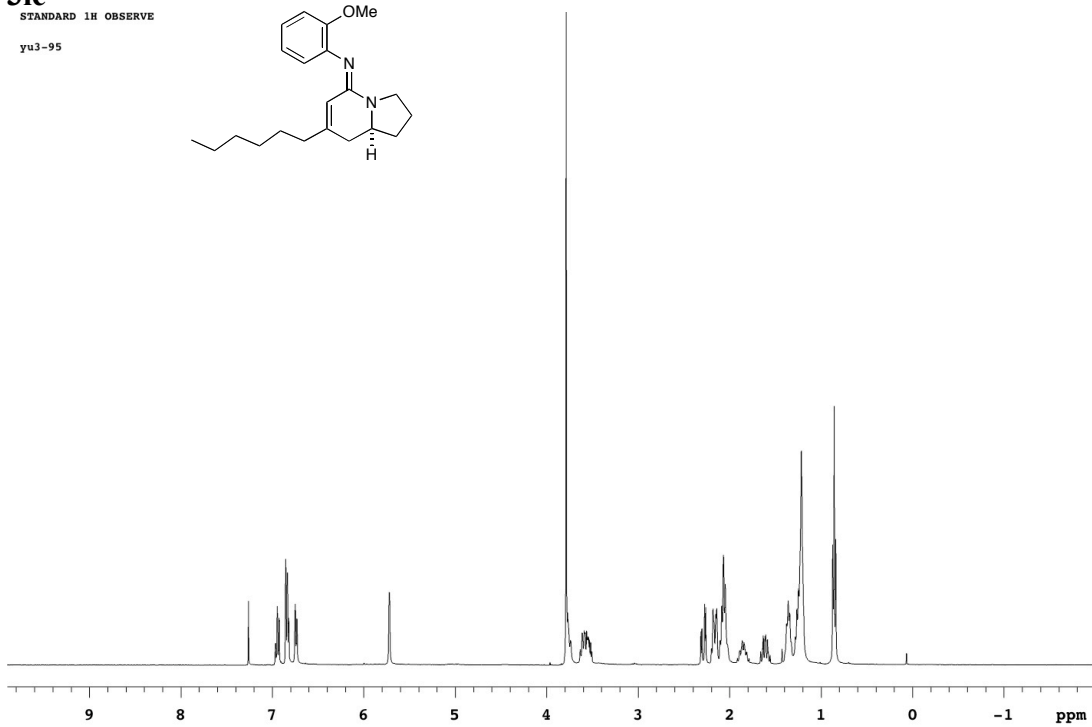

13C OBSERVE

yu3-95

yu3-95

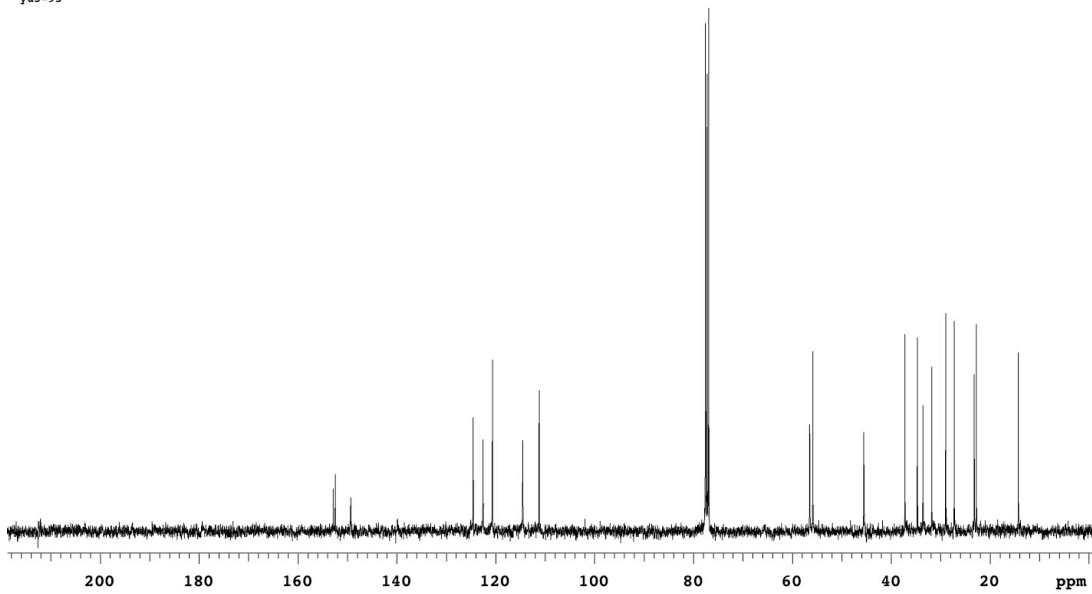

**3mc**

STANDARD 1H OBSERVE

yu3-139

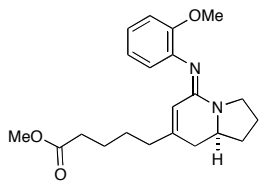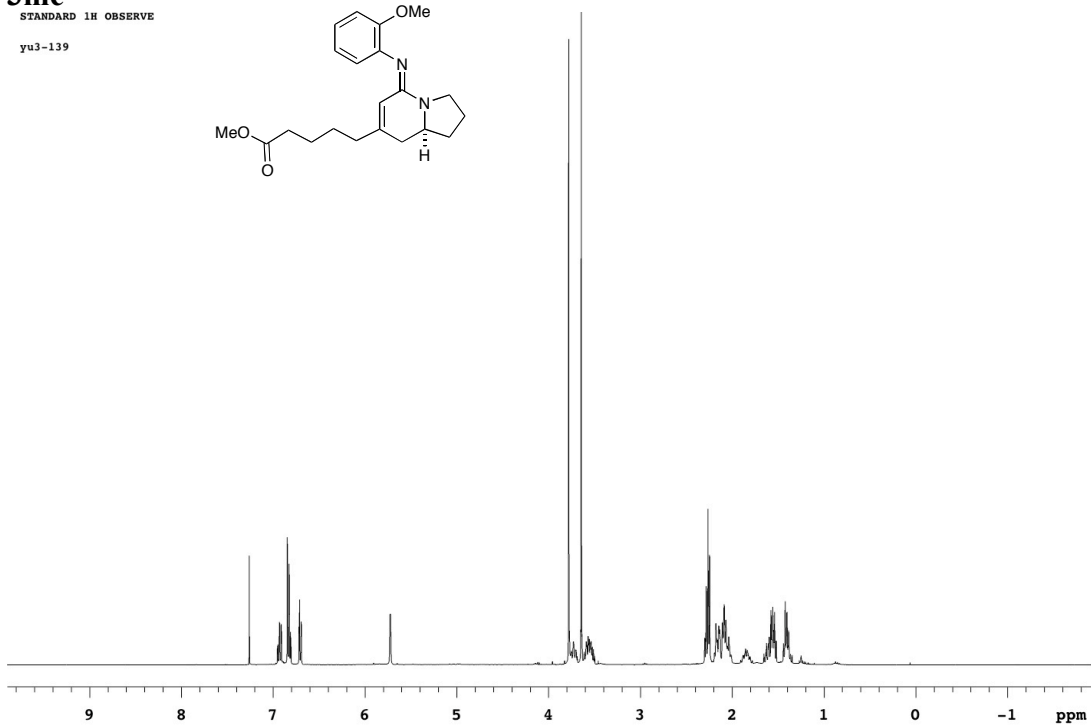

<sup>13</sup>C OBSERVE

yu3-139

yu3-139

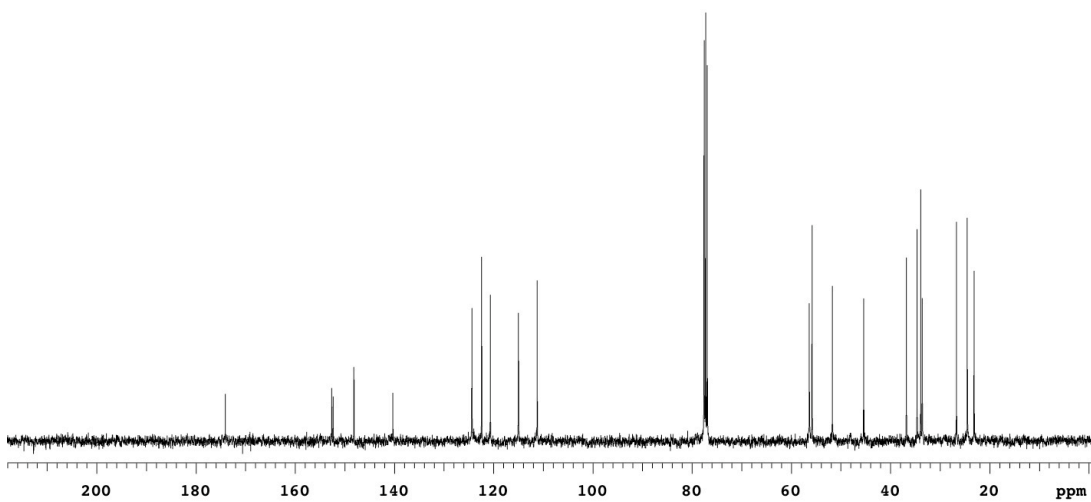

**3nc**

STANDARD 1H OBSERVE

yu3-140

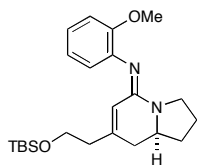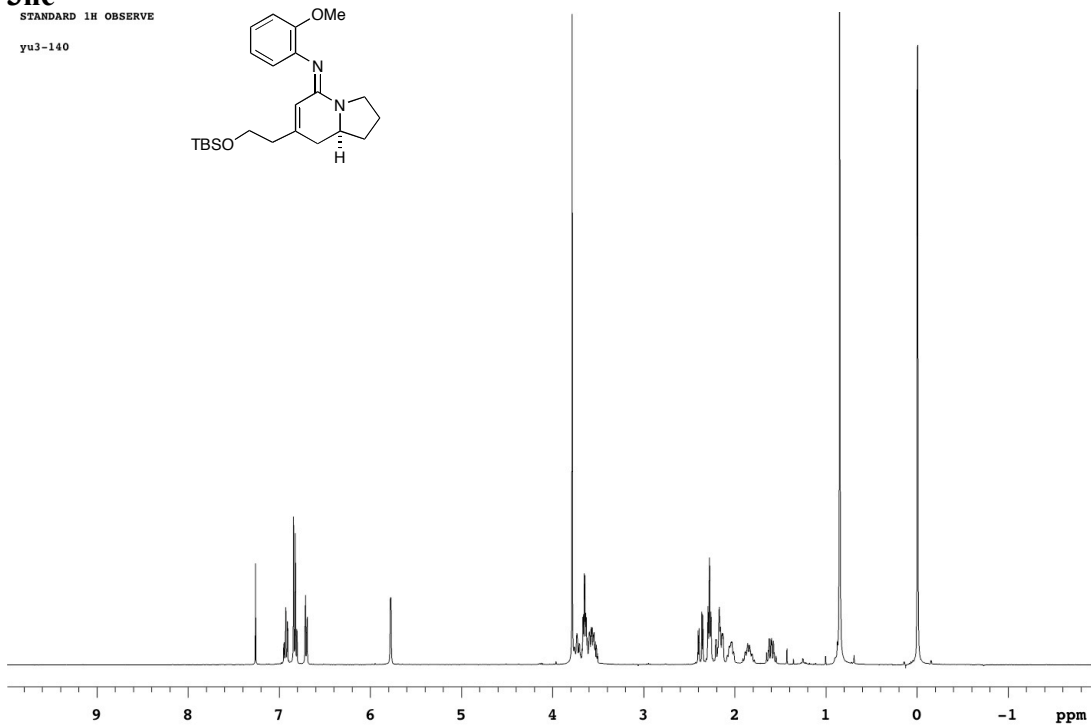

<sup>13</sup>C OBSERVE

yu3-140

yu3-140

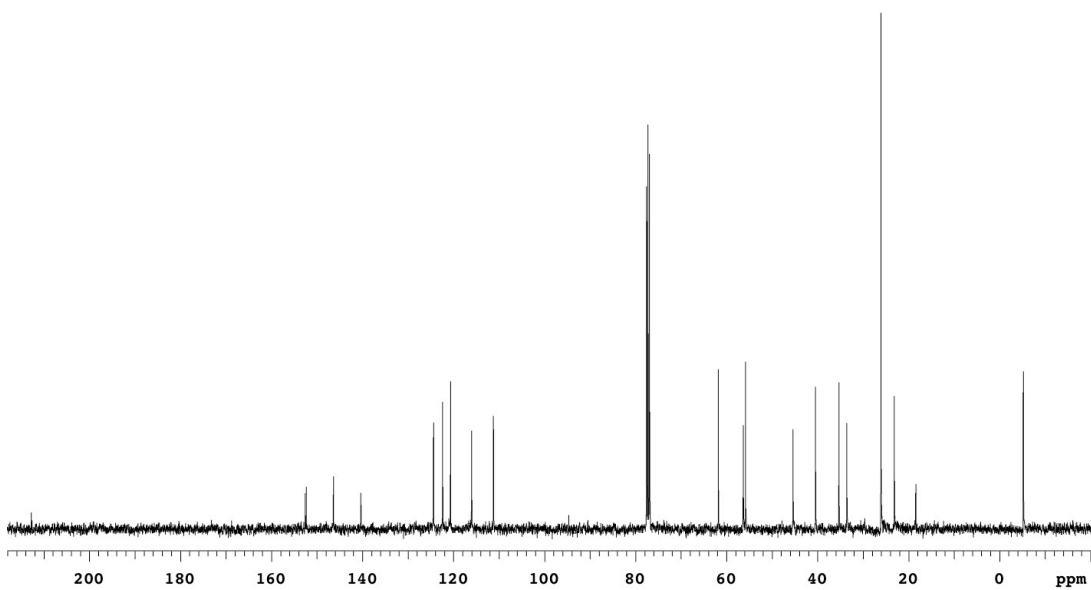

**3oc**

STANDARD 1H OBSERVE

yu3-146

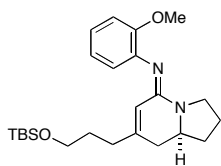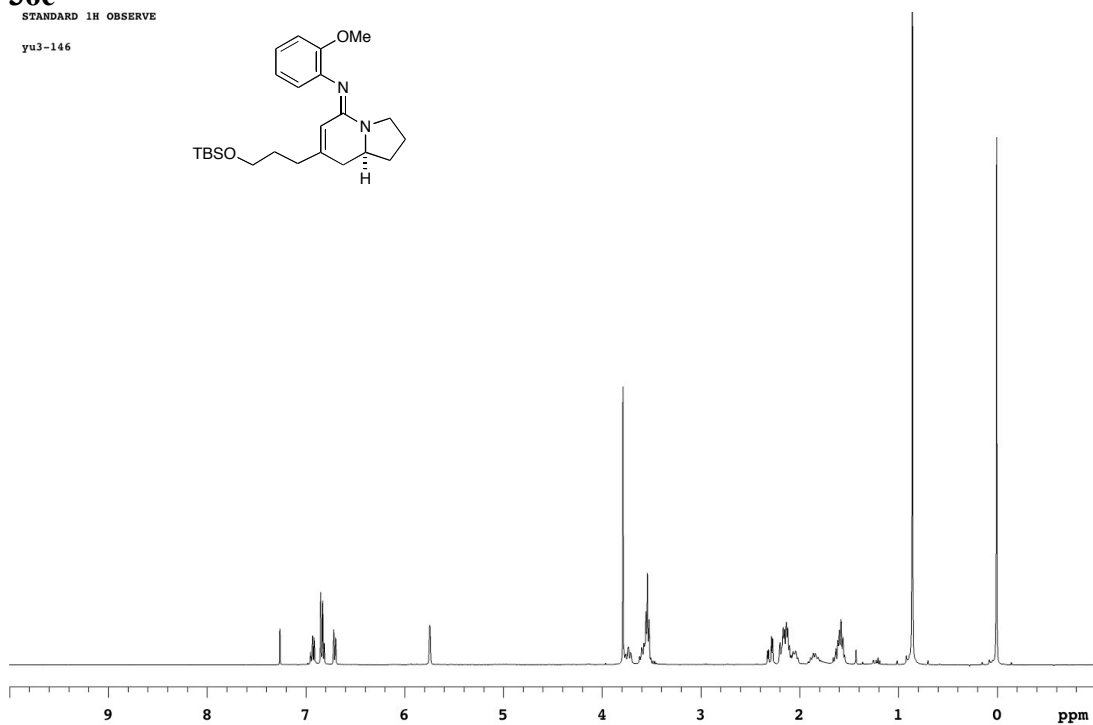

13C OBSERVE

yu3-146

yu3-146

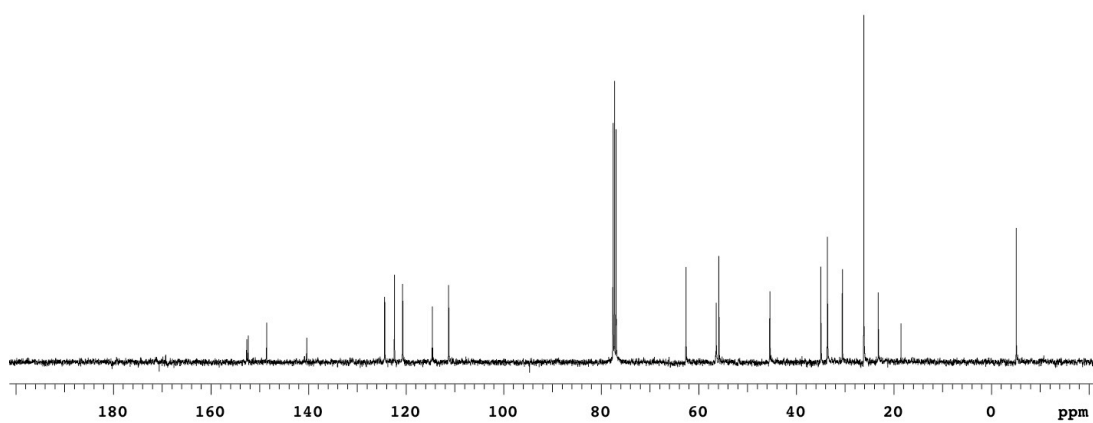

**3pc**  
STANDARD 1H OBSERVE  
yu3-142

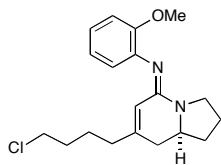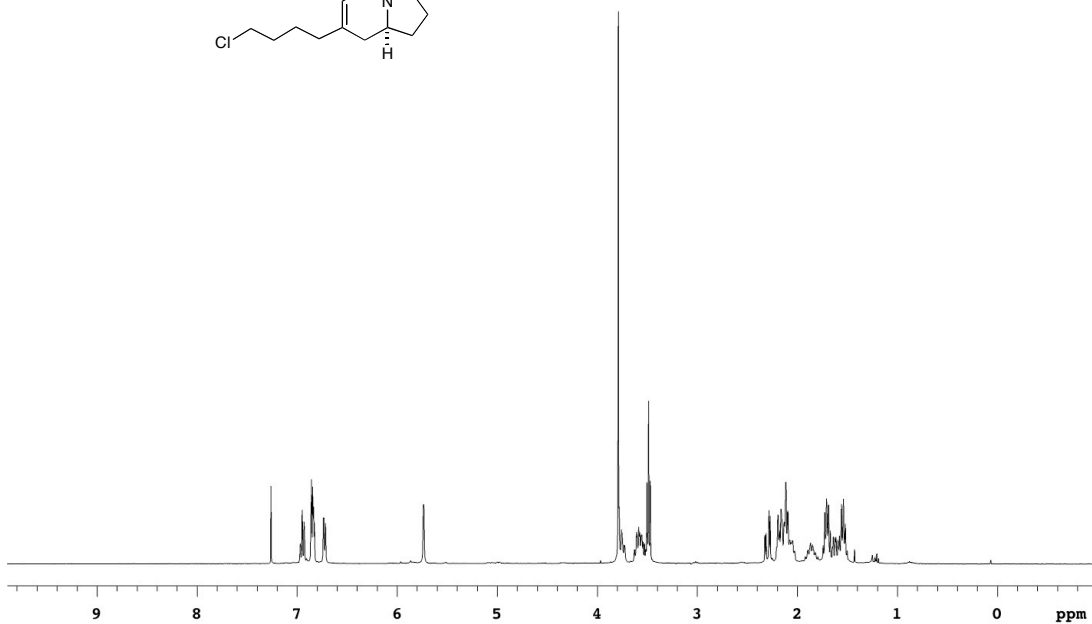

13C OBSERVE  
yu3-142  
yu3-142

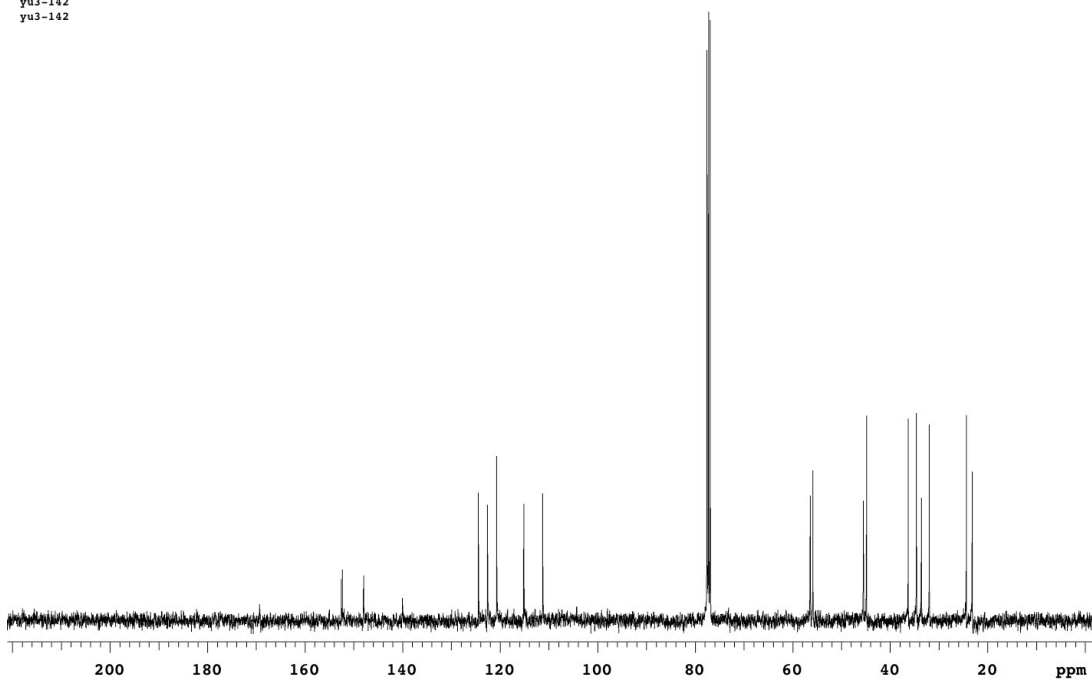



**3qc**

STANDARD 1H OBSERVE

yu3-145

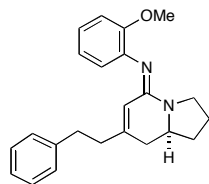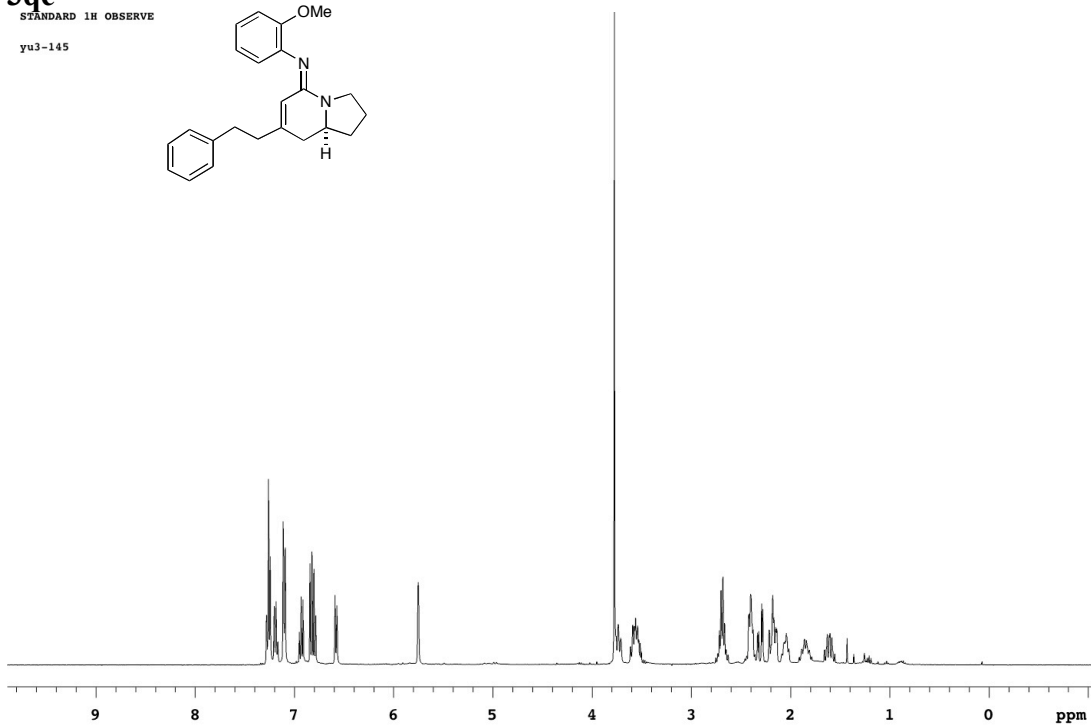

13C OBSERVE

yu3-145

yu3-145

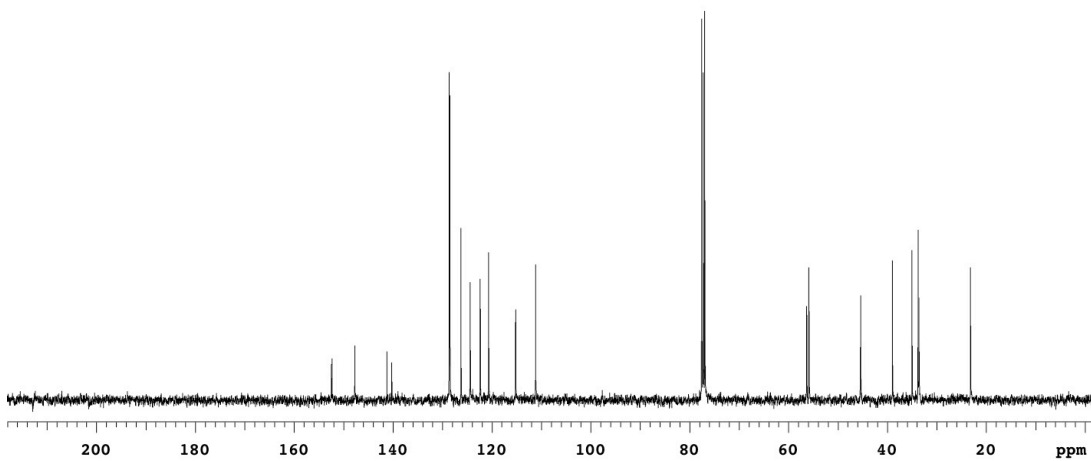

11

STANDARD 1H OBSERVE

yu3-195  
yu3-195

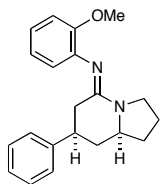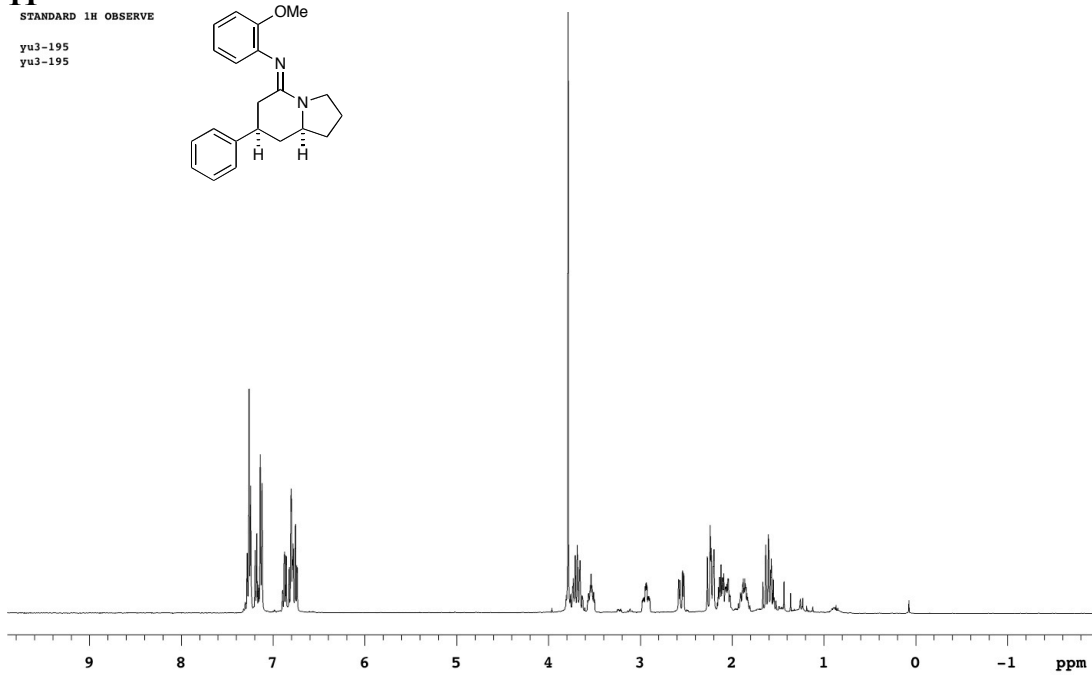

13C OBSERVE

yu3-195  
yu3-195

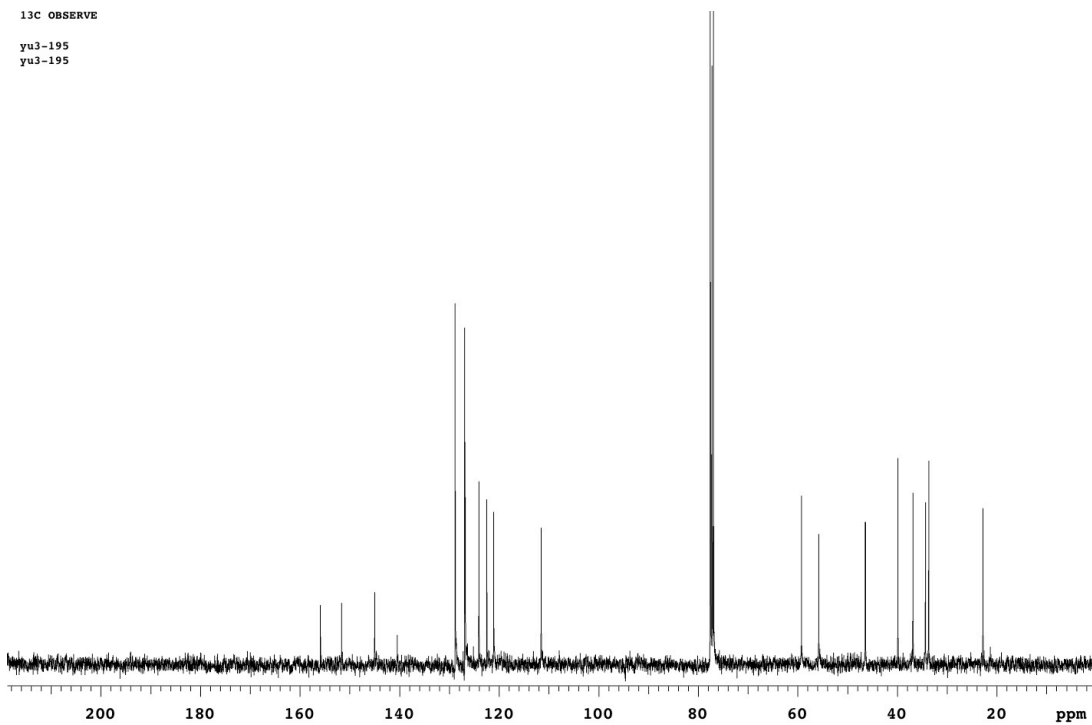

12

STANDARD 1H OBSERVE

yu3-183  
yu3-183

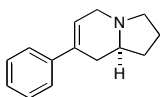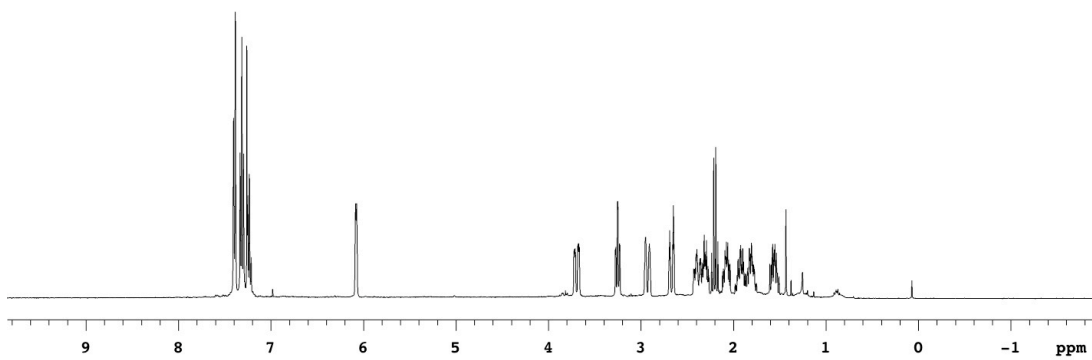

13C OBSERVE

yu3-183  
yu3-183

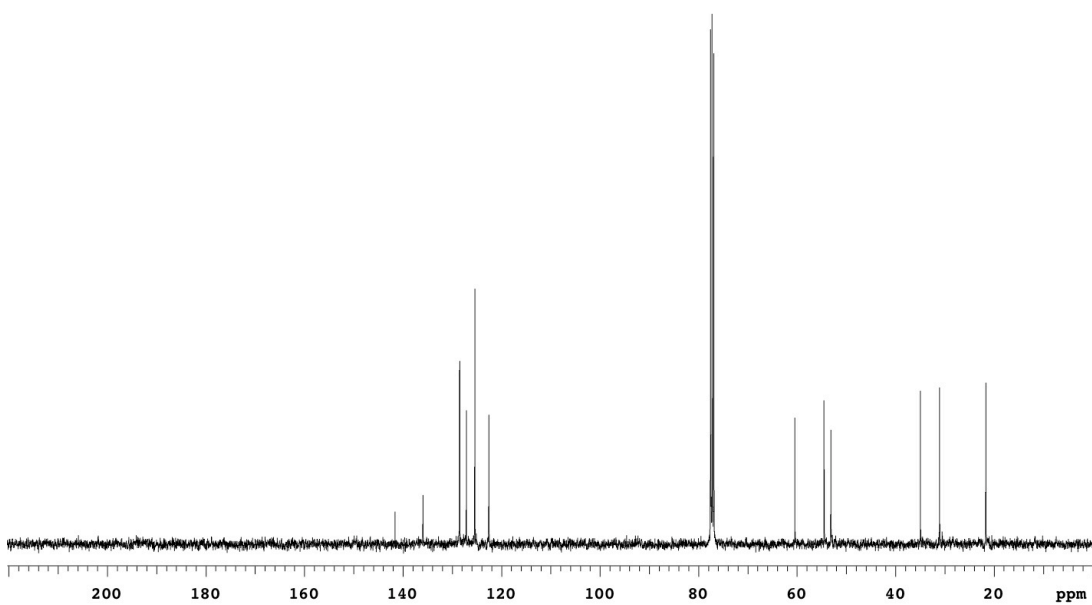

Table 7. Crystal data and structure refinement for rovis29\_0m (**3bc**).

|                                   |                                                     |          |
|-----------------------------------|-----------------------------------------------------|----------|
| Identification code               | rovis29_0m                                          |          |
| Empirical formula                 | C <sub>21</sub> H <sub>21</sub> Br N <sub>2</sub> O |          |
| Formula weight                    | 397.31                                              |          |
| Temperature                       | 100(2) K                                            |          |
| Wavelength                        | 0.71073 Å                                           |          |
| Crystal system                    | Orthorhombic                                        |          |
| Space group                       | P2(1)2(1)2(1)                                       |          |
| Unit cell dimensions              | a = 6.4508(13) Å                                    | α = 90°. |
|                                   | b = 14.332(3) Å                                     | β = 90°. |
|                                   | c = 38.051(8) Å                                     | γ = 90°. |
| Volume                            | 3518.0(13) Å <sup>3</sup>                           |          |
| Z                                 | 8                                                   |          |
| Density (calculated)              | 1.500 Mg/m <sup>3</sup>                             |          |
| Absorption coefficient            | 2.348 mm <sup>-1</sup>                              |          |
| F(000)                            | 1632                                                |          |
| Crystal size                      | 0.27 x 0.26 x 0.04 mm <sup>3</sup>                  |          |
| Theta range for data collection   | 3.50 to 30.03°.                                     |          |
| Index ranges                      | -3 ≤ h ≤ 9, -20 ≤ k ≤ 19, -47 ≤ l ≤ 53              |          |
| Reflections collected             | 22084                                               |          |
| Independent reflections           | 10257 [R(int) = 0.1359]                             |          |
| Completeness to theta = 30.03°    | 99.7 %                                              |          |
| Absorption correction             | multi-scan                                          |          |
| Max. and min. transmission        | 0.9161 and 0.5729                                   |          |
| Refinement method                 | Full-matrix least-squares on F <sup>2</sup>         |          |
| Data / restraints / parameters    | 10257 / 0 / 452                                     |          |
| Goodness-of-fit on F <sup>2</sup> | 0.923                                               |          |
| Final R indices [I > 2σ(I)]       | R1 = 0.0705, wR2 = 0.1039                           |          |
| R indices (all data)              | R1 = NaN, wR2 = 0.1405                              |          |
| Absolute structure parameter      | -0.016(19)                                          |          |
| Largest diff. peak and hole       | 0.580 and -0.573 e.Å <sup>-3</sup>                  |          |

Table 8. Atomic coordinates ( $\times 10^4$ ) and equivalent isotropic displacement parameters ( $\text{\AA}^2 \times 10^3$ ) for rovis29\_0m.  $U(\text{eq})$  is defined as one third of the trace of the orthogonalized  $U^{ij}$  tensor.

|        | x         | y        | z       | $U(\text{eq})$ |
|--------|-----------|----------|---------|----------------|
| Br(1)  | 6942(1)   | 1906(1)  | 9840(1) | 34(1)          |
| N(1)   | -4066(10) | -430(4)  | 8700(2) | 22(2)          |
| N(2)   | -4005(10) | 789(5)   | 8314(2) | 21(2)          |
| O(1)   | -264(8)   | 525(4)   | 7987(1) | 21(1)          |
| C(1)   | -3191(12) | 376(5)   | 8581(2) | 16(2)          |
| C(2)   | -1368(12) | 688(5)   | 8784(2) | 17(2)          |
| C(3)   | -476(13)  | 201(6)   | 9034(2) | 21(2)          |
| C(4)   | -1302(12) | -773(5)  | 9122(2) | 29(2)          |
| C(5)   | -3555(13) | -848(5)  | 9045(2) | 27(2)          |
| C(6)   | -4437(14) | -1821(6) | 9009(2) | 45(2)          |
| C(7)   | -6198(14) | -1747(6) | 8747(2) | 45(3)          |
| C(8)   | -5943(13) | -846(5)  | 8548(2) | 21(2)          |
| C(9)   | 1370(13)  | 559(5)   | 9229(2) | 19(2)          |
| C(10)  | 2785(13)  | 1157(5)  | 9058(2) | 22(2)          |
| C(11)  | 4423(12)  | 1554(6)  | 9238(2) | 22(2)          |
| C(12)  | 4651(12)  | 1359(6)  | 9590(2) | 25(2)          |
| C(13)  | 3366(12)  | 748(6)   | 9764(2) | 25(2)          |
| C(14)  | 1711(13)  | 372(6)   | 9583(2) | 25(2)          |
| C(15)  | -2933(12) | 1559(5)  | 8165(2) | 19(2)          |
| C(16)  | -3856(13) | 2434(6)  | 8161(2) | 23(2)          |
| C(17)  | -2835(12) | 3187(6)  | 7993(2) | 24(2)          |
| C(18)  | -1019(13) | 3045(6)  | 7815(2) | 25(2)          |
| C(19)  | -70(12)   | 2168(5)  | 7810(2) | 19(2)          |
| C(20)  | -1002(12) | 1434(5)  | 7986(2) | 18(2)          |
| C(21)  | 1536(13)  | 343(6)   | 7776(2) | 24(2)          |
| Br(1A) | 8267(1)   | 6859(1)  | 9885(1) | 33(1)          |
| N(1A)  | 19162(9)  | 4583(5)  | 8687(2) | 17(2)          |
| N(2A)  | 18968(10) | 5791(5)  | 8303(2) | 19(2)          |
| O(1A)  | 15297(8)  | 5531(4)  | 7948(1) | 21(1)          |
| C(1A)  | 18143(12) | 5312(5)  | 8553(2) | 18(2)          |
| C(2A)  | 16175(11) | 5592(5)  | 8735(2) | 18(2)          |

|        |           |         |         |       |
|--------|-----------|---------|---------|-------|
| C(3A)  | 15619(12) | 5207(5) | 9047(2) | 15(2) |
| C(4A)  | 16957(11) | 4457(5) | 9207(2) | 23(2) |
| C(5A)  | 18192(13) | 3926(5) | 8935(2) | 23(2) |
| C(6A)  | 20053(11) | 3372(5) | 9062(2) | 20(2) |
| C(7A)  | 21352(13) | 3295(6) | 8733(2) | 26(2) |
| C(8A)  | 21086(12) | 4224(5) | 8543(2) | 20(2) |
| C(9A)  | 13775(13) | 5564(5) | 9240(2) | 19(2) |
| C(10A) | 12229(12) | 6090(5) | 9080(2) | 18(2) |
| C(11A) | 10607(12) | 6470(5) | 9267(2) | 22(2) |
| C(12A) | 10464(13) | 6315(6) | 9628(2) | 24(2) |
| C(13A) | 11941(12) | 5774(6) | 9797(2) | 28(2) |
| C(14A) | 13570(13) | 5395(5) | 9601(2) | 23(2) |
| C(15A) | 17886(12) | 6553(5) | 8145(2) | 17(2) |
| C(16A) | 18764(13) | 7448(6) | 8154(2) | 21(2) |
| C(17A) | 17804(13) | 8187(7) | 7987(2) | 29(2) |
| C(18A) | 15990(13) | 8051(7) | 7797(2) | 25(2) |
| C(19A) | 15122(12) | 7167(6) | 7781(2) | 21(2) |
| C(20A) | 16082(13) | 6406(5) | 7954(2) | 19(2) |
| C(21A) | 13456(12) | 5348(6) | 7748(2) | 28(2) |

---

Table 9. Bond lengths [Å] and angles [°] for rovis29\_0m.

---

|               |           |
|---------------|-----------|
| Br(1)-C(12)   | 1.924(9)  |
| N(1)-C(1)     | 1.365(9)  |
| N(1)-C(8)     | 1.468(10) |
| N(1)-C(5)     | 1.478(9)  |
| N(2)-C(1)     | 1.288(9)  |
| N(2)-C(15)    | 1.421(9)  |
| O(1)-C(20)    | 1.387(9)  |
| O(1)-C(21)    | 1.435(9)  |
| C(1)-C(2)     | 1.476(10) |
| C(2)-C(3)     | 1.312(10) |
| C(3)-C(9)     | 1.494(12) |
| C(3)-C(4)     | 1.531(11) |
| C(4)-C(5)     | 1.486(11) |
| C(5)-C(6)     | 1.512(11) |
| C(6)-C(7)     | 1.516(11) |
| C(7)-C(8)     | 1.505(11) |
| C(9)-C(14)    | 1.390(10) |
| C(9)-C(10)    | 1.411(11) |
| C(10)-C(11)   | 1.380(11) |
| C(11)-C(12)   | 1.378(10) |
| C(12)-C(13)   | 1.376(11) |
| C(13)-C(14)   | 1.381(11) |
| C(15)-C(16)   | 1.388(10) |
| C(15)-C(20)   | 1.431(11) |
| C(16)-C(17)   | 1.418(10) |
| C(17)-C(18)   | 1.367(11) |
| C(18)-C(19)   | 1.399(11) |
| C(19)-C(20)   | 1.385(10) |
| Br(1A)-C(12A) | 1.891(8)  |
| N(1A)-C(1A)   | 1.335(9)  |
| N(1A)-C(8A)   | 1.451(9)  |
| N(1A)-C(5A)   | 1.472(9)  |
| N(2A)-C(1A)   | 1.289(9)  |
| N(2A)-C(15A)  | 1.430(9)  |

|                  |           |
|------------------|-----------|
| O(1A)-C(20A)     | 1.353(9)  |
| O(1A)-C(21A)     | 1.435(9)  |
| C(1A)-C(2A)      | 1.500(10) |
| C(2A)-C(3A)      | 1.360(10) |
| C(3A)-C(9A)      | 1.488(11) |
| C(3A)-C(4A)      | 1.507(10) |
| C(4A)-C(5A)      | 1.513(10) |
| C(5A)-C(6A)      | 1.518(10) |
| C(6A)-C(7A)      | 1.510(10) |
| C(7A)-C(8A)      | 1.526(10) |
| C(9A)-C(10A)     | 1.391(10) |
| C(9A)-C(14A)     | 1.403(10) |
| C(10A)-C(11A)    | 1.377(10) |
| C(11A)-C(12A)    | 1.394(11) |
| C(12A)-C(13A)    | 1.387(11) |
| C(13A)-C(14A)    | 1.398(11) |
| C(15A)-C(20A)    | 1.388(11) |
| C(15A)-C(16A)    | 1.402(10) |
| C(16A)-C(17A)    | 1.381(11) |
| C(17A)-C(18A)    | 1.389(11) |
| C(18A)-C(19A)    | 1.387(11) |
| C(19A)-C(20A)    | 1.415(10) |
|                  |           |
| C(1)-N(1)-C(8)   | 123.6(7)  |
| C(1)-N(1)-C(5)   | 123.1(6)  |
| C(8)-N(1)-C(5)   | 111.7(6)  |
| C(1)-N(2)-C(15)  | 118.2(7)  |
| C(20)-O(1)-C(21) | 116.6(6)  |
| N(2)-C(1)-N(1)   | 118.9(7)  |
| N(2)-C(1)-C(2)   | 126.8(7)  |
| N(1)-C(1)-C(2)   | 114.3(7)  |
| C(3)-C(2)-C(1)   | 124.6(8)  |
| C(2)-C(3)-C(9)   | 121.8(8)  |
| C(2)-C(3)-C(4)   | 119.3(8)  |
| C(9)-C(3)-C(4)   | 118.8(7)  |
| C(5)-C(4)-C(3)   | 111.3(6)  |



|                     |          |
|---------------------|----------|
| N(1)-C(5)-C(4)      | 111.3(6) |
| N(1)-C(5)-C(6)      | 102.1(6) |
| C(4)-C(5)-C(6)      | 116.9(7) |
| C(5)-C(6)-C(7)      | 106.1(7) |
| C(8)-C(7)-C(6)      | 108.0(7) |
| N(1)-C(8)-C(7)      | 103.9(7) |
| C(14)-C(9)-C(10)    | 117.4(8) |
| C(14)-C(9)-C(3)     | 122.8(8) |
| C(10)-C(9)-C(3)     | 119.8(7) |
| C(11)-C(10)-C(9)    | 121.3(7) |
| C(12)-C(11)-C(10)   | 118.6(8) |
| C(13)-C(12)-C(11)   | 122.2(8) |
| C(13)-C(12)-Br(1)   | 119.1(6) |
| C(11)-C(12)-Br(1)   | 118.7(7) |
| C(12)-C(13)-C(14)   | 118.3(7) |
| C(13)-C(14)-C(9)    | 122.1(8) |
| C(16)-C(15)-N(2)    | 119.8(7) |
| C(16)-C(15)-C(20)   | 118.8(7) |
| N(2)-C(15)-C(20)    | 121.1(7) |
| C(15)-C(16)-C(17)   | 119.5(8) |
| C(18)-C(17)-C(16)   | 120.6(8) |
| C(17)-C(18)-C(19)   | 121.1(8) |
| C(20)-C(19)-C(18)   | 119.0(7) |
| C(19)-C(20)-O(1)    | 124.4(7) |
| C(19)-C(20)-C(15)   | 120.9(7) |
| O(1)-C(20)-C(15)    | 114.6(7) |
| C(1A)-N(1A)-C(8A)   | 123.6(6) |
| C(1A)-N(1A)-C(5A)   | 122.4(6) |
| C(8A)-N(1A)-C(5A)   | 112.3(6) |
| C(1A)-N(2A)-C(15A)  | 121.2(7) |
| C(20A)-O(1A)-C(21A) | 119.1(6) |
| N(2A)-C(1A)-N(1A)   | 119.7(7) |
| N(2A)-C(1A)-C(2A)   | 123.1(7) |
| N(1A)-C(1A)-C(2A)   | 116.8(7) |
| C(3A)-C(2A)-C(1A)   | 121.2(7) |
| C(2A)-C(3A)-C(9A)   | 120.2(7) |

|                      |          |
|----------------------|----------|
| C(2A)-C(3A)-C(4A)    | 119.4(7) |
| C(9A)-C(3A)-C(4A)    | 120.3(7) |
| C(3A)-C(4A)-C(5A)    | 112.6(6) |
| N(1A)-C(5A)-C(4A)    | 110.0(6) |
| N(1A)-C(5A)-C(6A)    | 101.7(6) |
| C(4A)-C(5A)-C(6A)    | 117.4(6) |
| C(7A)-C(6A)-C(5A)    | 102.3(6) |
| C(6A)-C(7A)-C(8A)    | 105.5(6) |
| N(1A)-C(8A)-C(7A)    | 103.0(6) |
| C(10A)-C(9A)-C(14A)  | 117.1(8) |
| C(10A)-C(9A)-C(3A)   | 123.0(7) |
| C(14A)-C(9A)-C(3A)   | 119.9(8) |
| C(11A)-C(10A)-C(9A)  | 122.2(7) |
| C(10A)-C(11A)-C(12A) | 119.8(8) |
| C(13A)-C(12A)-C(11A) | 120.1(8) |
| C(13A)-C(12A)-Br(1A) | 120.3(6) |
| C(11A)-C(12A)-Br(1A) | 119.6(7) |
| C(12A)-C(13A)-C(14A) | 119.0(8) |
| C(13A)-C(14A)-C(9A)  | 121.8(8) |
| C(20A)-C(15A)-C(16A) | 119.4(7) |
| C(20A)-C(15A)-N(2A)  | 120.9(7) |
| C(16A)-C(15A)-N(2A)  | 119.4(7) |
| C(17A)-C(16A)-C(15A) | 120.5(8) |
| C(16A)-C(17A)-C(18A) | 120.7(9) |
| C(19A)-C(18A)-C(17A) | 119.3(9) |
| C(18A)-C(19A)-C(20A) | 120.5(8) |
| O(1A)-C(20A)-C(15A)  | 117.6(7) |
| O(1A)-C(20A)-C(19A)  | 122.9(7) |
| C(15A)-C(20A)-C(19A) | 119.5(7) |

---

Symmetry transformations used to generate equivalent atoms:

Table 10. Anisotropic displacement parameters ( $\text{\AA}^2 \times 10^3$ ) for rovis29\_0m. The anisotropic displacement factor exponent takes the form:  $-2\pi^2 [ h^2 a^{*2} U^{11} + \dots + 2 h k a^* b^* U^{12} ]$

|        | $U^{11}$ | $U^{22}$ | $U^{33}$ | $U^{23}$ | $U^{13}$ | $U^{12}$ |
|--------|----------|----------|----------|----------|----------|----------|
| Br(1)  | 31(1)    | 42(1)    | 31(1)    | -2(1)    | -6(1)    | -3(1)    |
| N(1)   | 20(3)    | 6(4)     | 38(4)    | 0(3)     | 2(3)     | -6(3)    |
| N(2)   | 21(4)    | 20(4)    | 20(4)    | 3(3)     | 3(3)     | 5(3)     |
| O(1)   | 20(3)    | 23(3)    | 18(3)    | 1(2)     | 3(2)     | 4(3)     |
| C(1)   | 19(4)    | 7(4)     | 23(4)    | 1(3)     | 11(4)    | 0(3)     |
| C(2)   | 16(4)    | 19(4)    | 16(4)    | 2(3)     | 6(3)     | 2(3)     |
| C(3)   | 24(4)    | 26(5)    | 14(4)    | 4(4)     | 13(4)    | 4(4)     |
| C(4)   | 33(5)    | 26(4)    | 26(4)    | 6(4)     | -4(4)    | 8(4)     |
| C(5)   | 33(5)    | 23(4)    | 24(4)    | 6(3)     | -2(4)    | -12(4)   |
| C(6)   | 56(6)    | 30(5)    | 48(5)    | 6(5)     | -12(5)   | -19(5)   |
| C(7)   | 39(5)    | 26(5)    | 69(6)    | 20(5)    | -15(5)   | -9(5)    |
| C(8)   | 22(4)    | 13(4)    | 29(5)    | -2(4)    | 10(4)    | 3(4)     |
| C(9)   | 25(4)    | 19(5)    | 14(4)    | 3(3)     | 4(4)     | 6(4)     |
| C(10)  | 29(4)    | 14(4)    | 24(4)    | 4(3)     | -6(4)    | 11(4)    |
| C(11)  | 22(4)    | 20(5)    | 24(4)    | -2(3)    | 7(4)     | 11(4)    |
| C(12)  | 20(4)    | 29(5)    | 28(5)    | 1(4)     | -3(4)    | 11(4)    |
| C(13)  | 21(4)    | 36(5)    | 16(4)    | 11(4)    | 2(4)     | 3(4)     |
| C(14)  | 20(4)    | 35(5)    | 21(4)    | 9(4)     | 7(4)     | 0(4)     |
| C(15)  | 18(4)    | 23(5)    | 15(4)    | 1(3)     | -5(4)    | -7(4)    |
| C(16)  | 28(5)    | 19(5)    | 21(4)    | -1(4)    | -5(4)    | 0(4)     |
| C(17)  | 30(4)    | 14(4)    | 29(4)    | 1(4)     | -12(4)   | -1(5)    |
| C(18)  | 36(5)    | 14(5)    | 26(4)    | -2(4)    | 1(4)     | -13(4)   |
| C(19)  | 23(4)    | 20(5)    | 15(4)    | -5(3)    | 2(3)     | 5(4)     |
| C(20)  | 16(4)    | 16(4)    | 21(4)    | -2(3)    | 1(3)     | 2(3)     |
| C(21)  | 20(4)    | 23(5)    | 29(4)    | 6(4)     | -1(4)    | 3(4)     |
| Br(1A) | 26(1)    | 35(1)    | 38(1)    | -6(1)    | 10(1)    | 3(1)     |
| N(1A)  | 16(3)    | 25(4)    | 12(3)    | 8(3)     | 2(3)     | 3(3)     |
| N(2A)  | 17(4)    | 19(4)    | 21(4)    | 2(3)     | -2(3)    | 6(3)     |
| O(1A)  | 17(3)    | 16(3)    | 29(3)    | 8(2)     | -5(2)    | -2(2)    |
| C(1A)  | 16(4)    | 21(4)    | 16(4)    | -7(3)    | 1(4)     | -5(3)    |
| C(2A)  | 14(4)    | 20(4)    | 19(4)    | 3(3)     | 1(3)     | 2(3)     |

|        |       |       |       |       |        |       |
|--------|-------|-------|-------|-------|--------|-------|
| C(3A)  | 17(4) | 7(4)  | 22(4) | -6(3) | 1(3)   | -2(3) |
| C(4A)  | 24(4) | 14(4) | 29(4) | 6(3)  | 1(4)   | -4(3) |
| C(5A)  | 30(4) | 19(4) | 21(4) | 2(3)  | 1(4)   | 8(4)  |
| C(6A)  | 20(4) | 20(4) | 21(4) | 4(3)  | 0(3)   | 8(3)  |
| C(7A)  | 27(4) | 22(5) | 30(4) | 6(4)  | -5(4)  | 4(4)  |
| C(8A)  | 19(4) | 15(4) | 25(4) | -1(4) | -3(3)  | 5(3)  |
| C(9A)  | 24(4) | 13(4) | 19(4) | -1(3) | -3(4)  | -6(4) |
| C(10A) | 23(4) | 14(4) | 18(4) | 6(3)  | 0(3)   | 0(3)  |
| C(11A) | 19(4) | 16(4) | 31(5) | 1(4)  | -3(4)  | 1(3)  |
| C(12A) | 29(4) | 13(4) | 30(5) | -6(4) | 13(4)  | 1(4)  |
| C(13A) | 27(4) | 35(5) | 21(4) | -3(4) | 0(4)   | -8(4) |
| C(14A) | 22(4) | 24(5) | 22(4) | -2(4) | 5(4)   | 1(4)  |
| C(15A) | 20(4) | 15(5) | 15(4) | 0(3)  | -1(3)  | -5(3) |
| C(16A) | 21(4) | 26(5) | 16(4) | -5(4) | 0(4)   | 5(4)  |
| C(17A) | 37(5) | 31(5) | 18(4) | -3(4) | 11(4)  | -3(5) |
| C(18A) | 34(5) | 24(5) | 18(4) | 6(4)  | 9(3)   | 7(5)  |
| C(19A) | 22(4) | 27(5) | 15(4) | -1(4) | 9(3)   | 7(4)  |
| C(20A) | 27(4) | 10(4) | 20(4) | 1(3)  | 4(3)   | 1(3)  |
| C(21A) | 15(4) | 35(5) | 33(5) | 0(4)  | -11(4) | 0(4)  |

---

Table 11. Hydrogen coordinates ( $\times 10^4$ ) and isotropic displacement parameters ( $\text{\AA}^2 \times 10^3$ ) for rovis29\_0m.

|        | x     | y     | z     | U(eq) |
|--------|-------|-------|-------|-------|
| H(2B)  | -800  | 1282  | 8730  | 21    |
| H(4A)  | -539  | -1244 | 8982  | 34    |
| H(4B)  | -1059 | -906  | 9374  | 34    |
| H(5A)  | -4342 | -509  | 9232  | 32    |
| H(6A)  | -4955 | -2048 | 9238  | 54    |
| H(6B)  | -3363 | -2258 | 8923  | 54    |
| H(7A)  | -6159 | -2282 | 8582  | 53    |
| H(7B)  | -7547 | -1754 | 8871  | 53    |
| H(8A)  | -5763 | -963  | 8293  | 26    |
| H(8B)  | -7158 | -434  | 8583  | 26    |
| H(10A) | 2607  | 1290  | 8816  | 27    |
| H(11A) | 5374  | 1953  | 9120  | 26    |
| H(13A) | 3610  | 588   | 10003 | 29    |
| H(14A) | 775   | -27   | 9703  | 30    |
| H(16A) | -5162 | 2528  | 8271  | 27    |
| H(17A) | -3418 | 3795  | 8003  | 29    |
| H(18A) | -391  | 3551  | 7694  | 30    |
| H(19A) | 1195  | 2076  | 7686  | 23    |
| H(21A) | 1917  | -317  | 7797  | 36    |
| H(21B) | 2689  | 732   | 7857  | 36    |
| H(21C) | 1232  | 489   | 7530  | 36    |
| H(2AB) | 15302 | 6047  | 8629  | 21    |
| H(4AA) | 16065 | 4014  | 9337  | 27    |
| H(4AB) | 17924 | 4745  | 9377  | 27    |
| H(5AA) | 17241 | 3502  | 8802  | 28    |
| H(6AA) | 20804 | 3709  | 9250  | 24    |
| H(6AB) | 19635 | 2750  | 9149  | 24    |
| H(7AA) | 20863 | 2773  | 8584  | 31    |
| H(7AB) | 22826 | 3188  | 8793  | 31    |
| H(8AA) | 22257 | 4650  | 8593  | 24    |

|        |       |      |       |    |
|--------|-------|------|-------|----|
| H(8AB) | 20977 | 4132 | 8285  | 24 |
| H(10B) | 12293 | 6191 | 8833  | 22 |
| H(11B) | 9591  | 6837 | 9151  | 26 |
| H(13B) | 11847 | 5663 | 10043 | 34 |
| H(14B) | 14564 | 5012 | 9716  | 27 |
| H(16B) | 20030 | 7547 | 8276  | 25 |
| H(17B) | 18389 | 8793 | 8002  | 35 |
| H(18B) | 15351 | 8559 | 7678  | 30 |
| H(19B) | 13872 | 7071 | 7654  | 25 |
| H(21D) | 13094 | 4686 | 7768  | 42 |
| H(21E) | 13703 | 5505 | 7501  | 42 |
| H(21F) | 12314 | 5729 | 7839  | 42 |

---

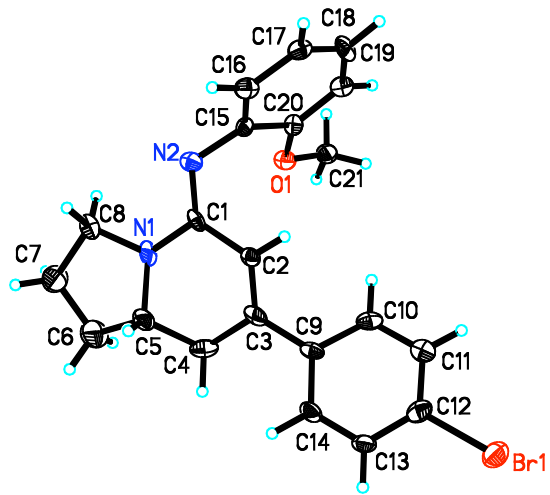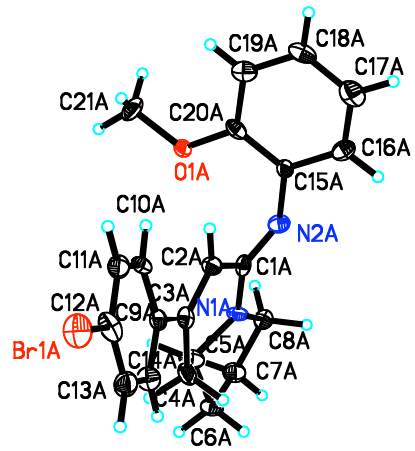

Supplement: NIHMS214576-supplement-Supplementary.pdf [file NIHMS214576-supplement-Supplementary.pdf]
